# Supplementary material for: How an early or late transition state impacts the stereoselectivity of tetrahydropyran formation by intramolecular oxa-Michael addition
Source: Royal Society of Chemistry journal article supplement (doi:10.1039/c9ob00750d), 2019-01-01
Supplement: c9ob00750d3.pdf [file c9ob00750d3.pdf]

## How an Early or Late Transition State Impacts the Stereoselectivity of Tetrahydropyran Formation by Intramolecular oxa-Michael Addition

Dániel Csókás,<sup>a</sup> Annabel Ho Xuan Ying,<sup>a</sup>  
Raghunath O. Ramabhadran<sup>b\*</sup> and Roderick W. Bates<sup>a\*</sup>

a. Division of Chemistry and Biological Chemistry, School of Physical and Mathematical Sciences, Nanyang Technological University, 21 Nanyang Link, Singapore 637371

b. Indian Institute of Science Education and Research (IISER) Tirupati, Transit Campus - Sree Rama Engineering College, Mangalam P/O, Tirupati - 517507, Andhra Pradesh, India

### Supporting information II: NMR Spectra and crystallographic data

#### Table of Contents

|                                                 |                    |                     |      |
|-------------------------------------------------|--------------------|---------------------|------|
| <b>Stereochemical assignments of the THPs</b>   | <b>2</b>           |                     |      |
| <b>NMR Spectra</b>                              | <b>5</b>           |                     |      |
| General information                             | 5                  |                     |      |
|                                                 | <sup>1</sup> H NMR | <sup>13</sup> C NMR | COSY |
| <b>10a</b>                                      | 6                  | 7                   |      |
| <b><i>cis</i>-22</b>                            | 8                  | 9                   |      |
| <b><i>trans</i>-22</b>                          | 11                 | 12                  | 13   |
| <b>12a</b>                                      | 14                 | 15                  |      |
| <b><i>trans</i>-23</b>                          | 16                 | 17                  | 18   |
| <b>15a</b>                                      | 19                 | 20                  |      |
| <b><i>cis</i>-24</b>                            | 21                 | 22                  | 23   |
| <b><i>trans</i>-24</b>                          | 24                 | 25                  | 26   |
| <b>17a</b>                                      | 27                 | 28                  |      |
| <b><i>trans</i>-25</b>                          | 29                 | 30                  | 31   |
| <b><i>cis</i>-25</b>                            | 32                 | 33                  | 34   |
| <b><i>trans</i>-21</b>                          | 35                 | 36                  |      |
| <b><i>trans</i>-19</b>                          | 37                 | 38                  |      |
| <b><i>cis</i>-20</b>                            | 39                 | 40                  |      |
| <b><i>cis</i>-18</b>                            | 41                 | 42                  |      |
| <b>crystallographic data and ORTEP diagrams</b> |                    |                     |      |
| <b><i>cis</i>-20</b>                            | 43                 |                     |      |
| <b><i>trans</i>-19</b>                          | 47                 |                     |      |
| <b><i>trans</i>-21</b>                          | 53                 |                     |      |

## Stereochemical assignments of the obtained THPs

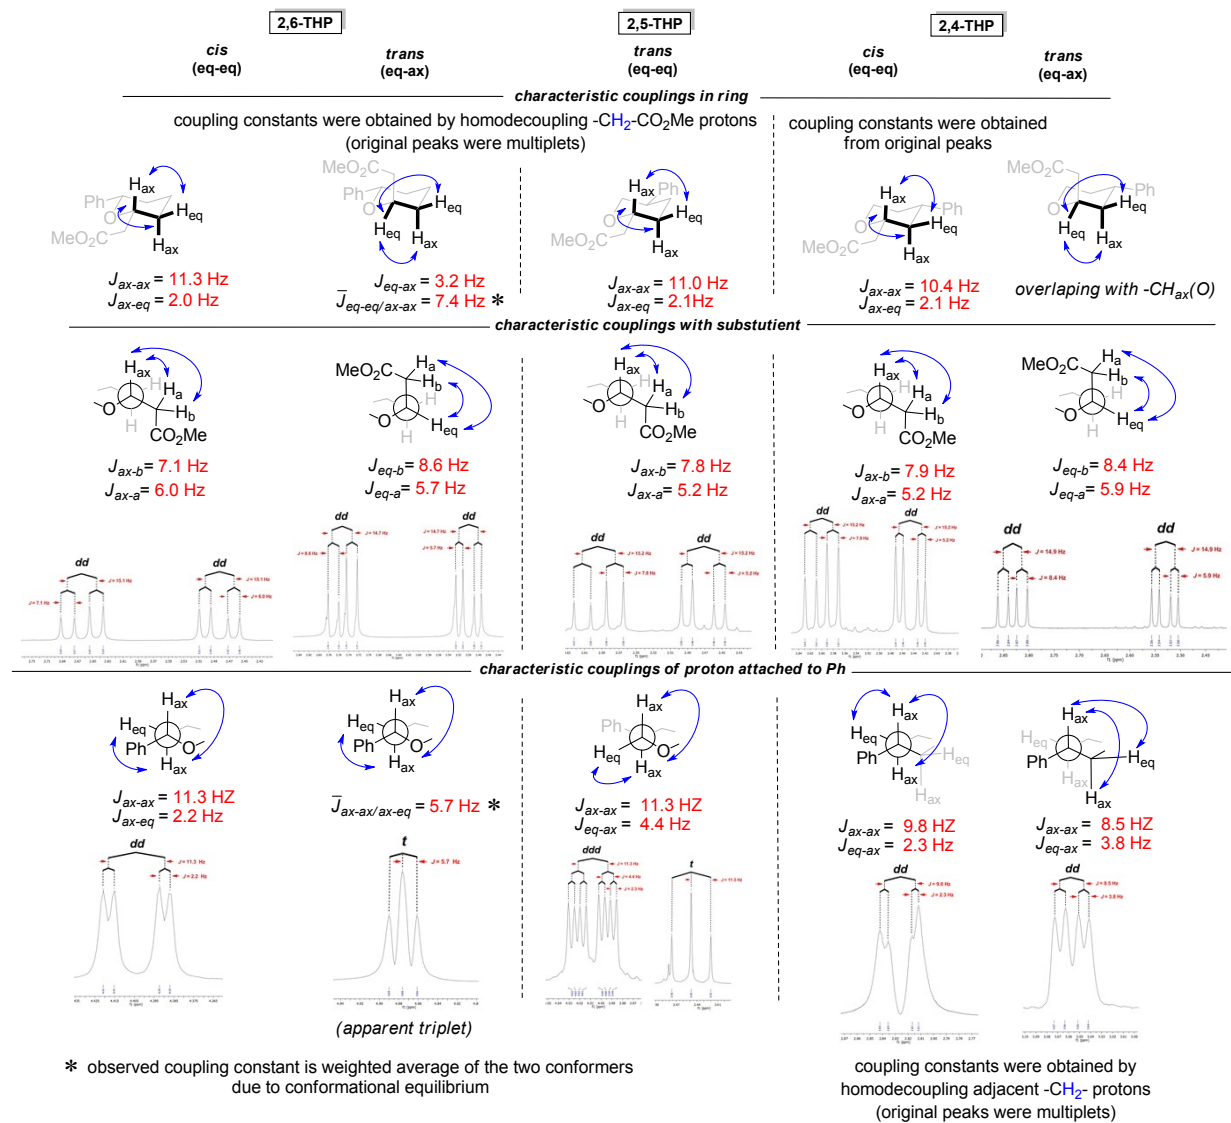

Figure 1 Stereochemical assignment of 2,6-, 2,5-, 2,4-THPs obtained from base-catalysed oxa-Michael cyclisation

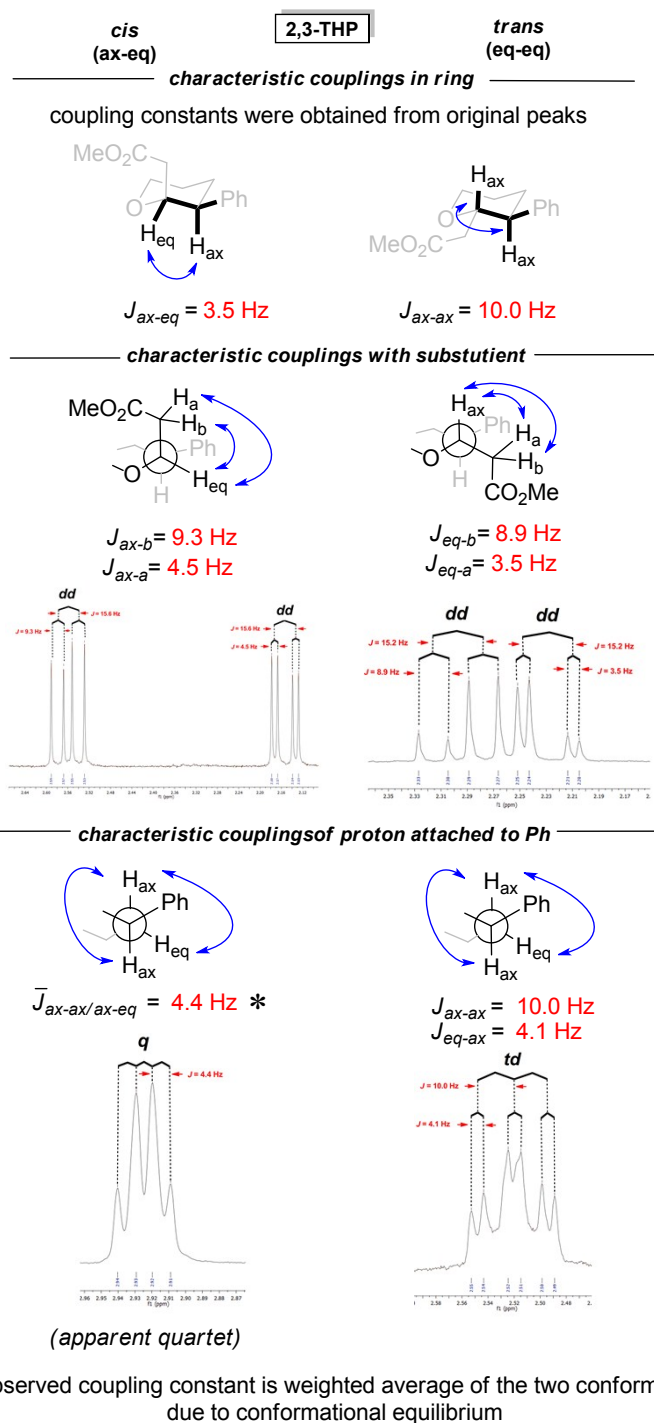

**Figure 2 Stereochemical assignment of 2,3-THP obtained from base-catalysed oxa-Michael cyclisation**

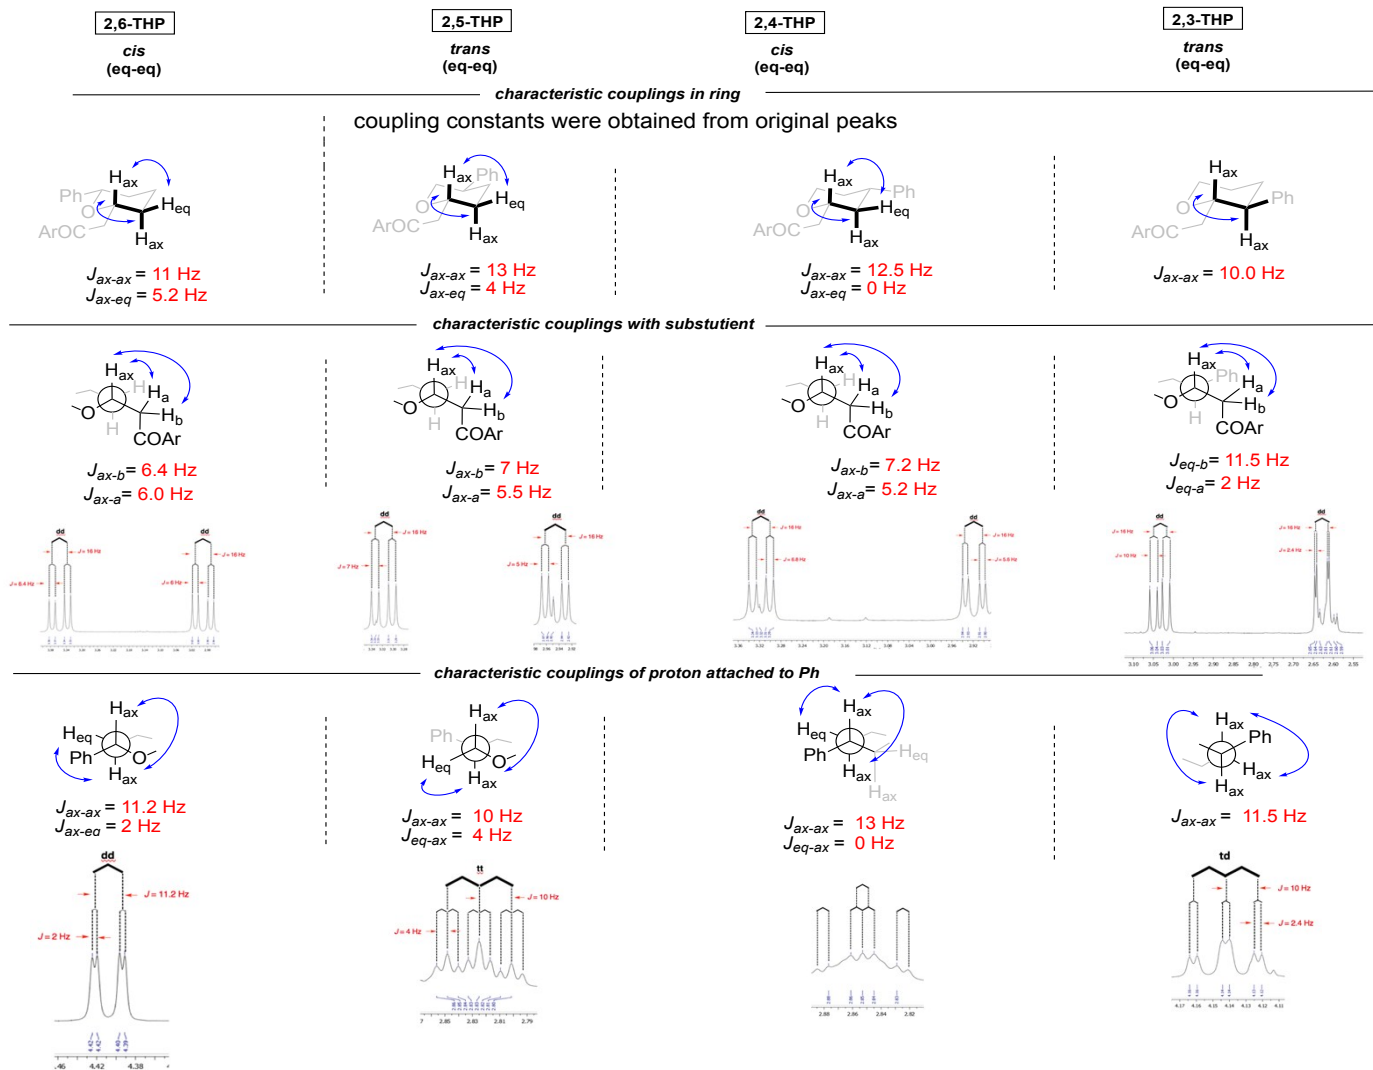

Figure 3 Stereochemical assignment of 2,6-, 2,5-, 2,4, 2,3-THPs obtained from acid-catalysed oxa-Michael cyclisation

## NMR Spectra

### General information

NMR spectra were recorded on JEOL ECA 400SL (400MHz), JEOL ECA 400 (400MHz) and Bruker AV400 (400 MHz) spectrometers in CDCl<sub>3</sub> solutions. Chemical shifts are given in ppm (referenced to the residual chloroform <sup>1</sup>H-spectrum 7.26 ppm, <sup>13</sup>C-spectrum: 77.16 ppm) and coupling constants in Hz. In the cases of severely overlapping peaks, the integration of individual peaks is assumed to be the expected value.

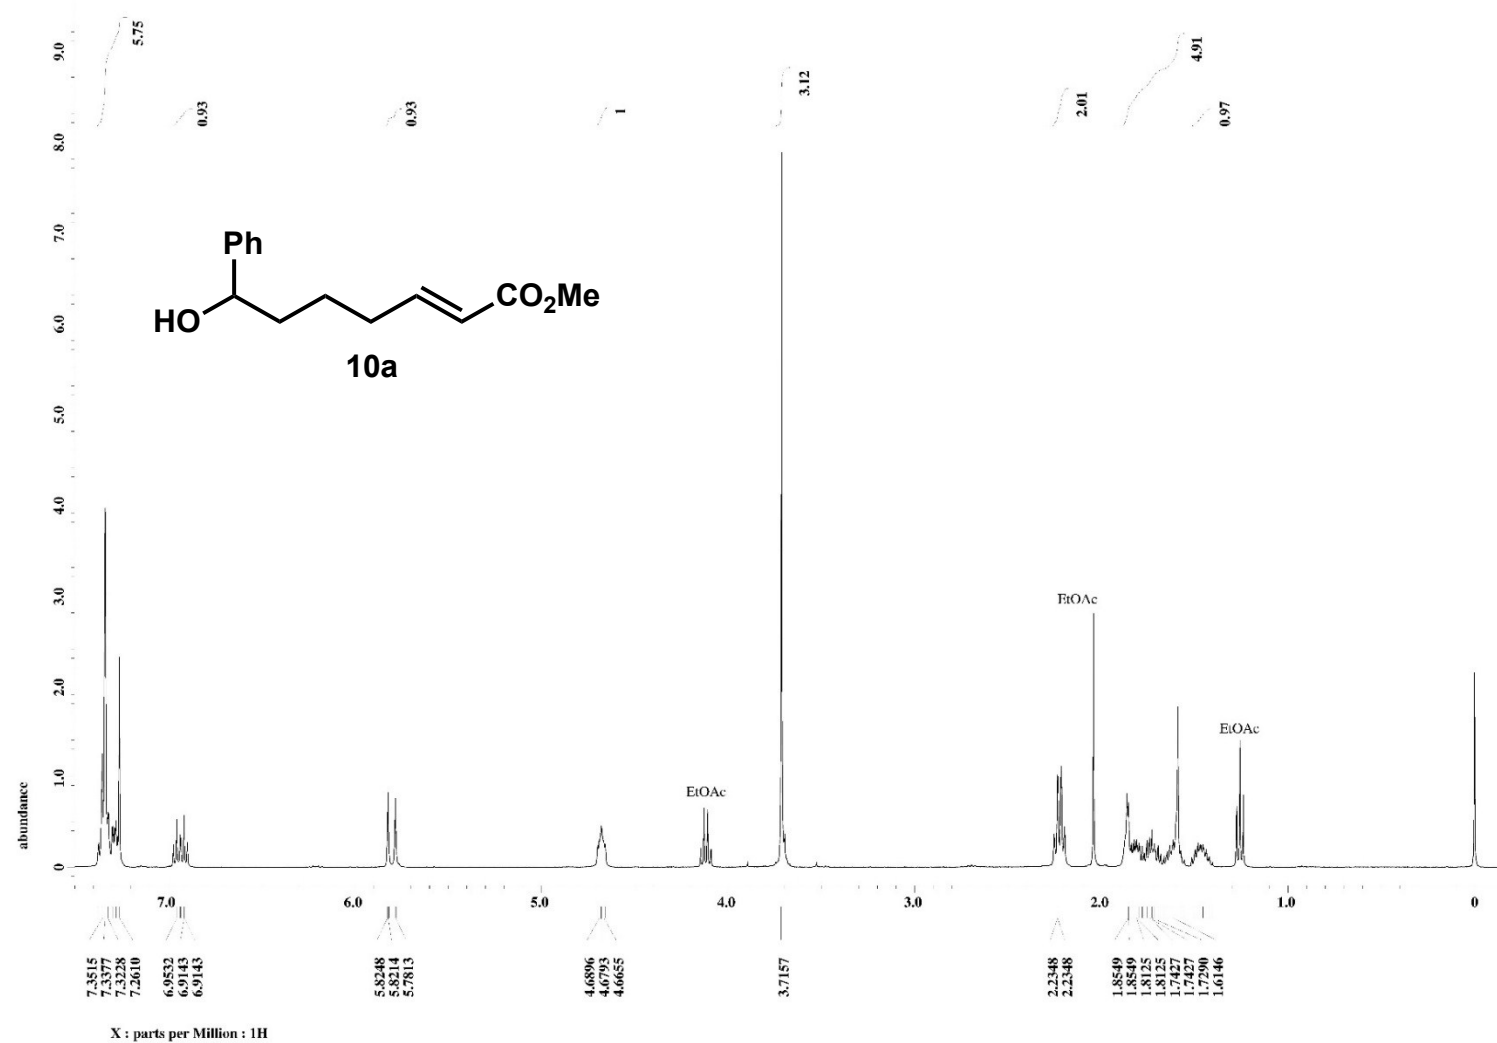

Figure 4  $^1\text{H}$  NMR spectrum of 10a

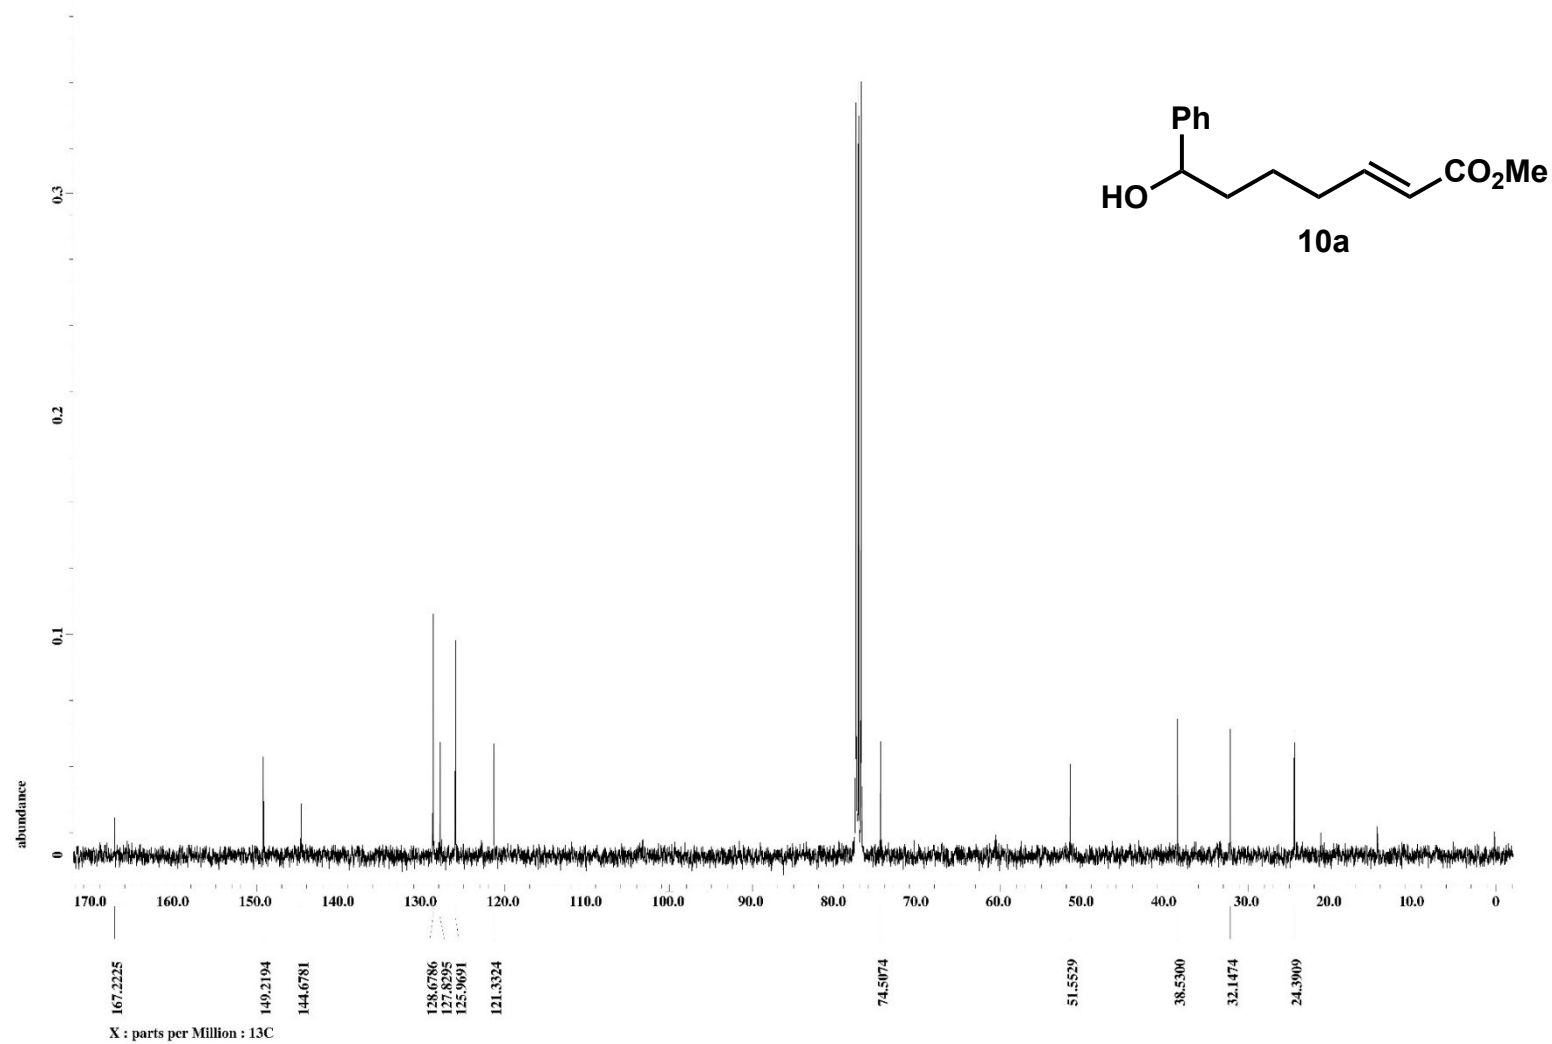

Figure 5 <sup>13</sup>C NMR spectrum of 10a

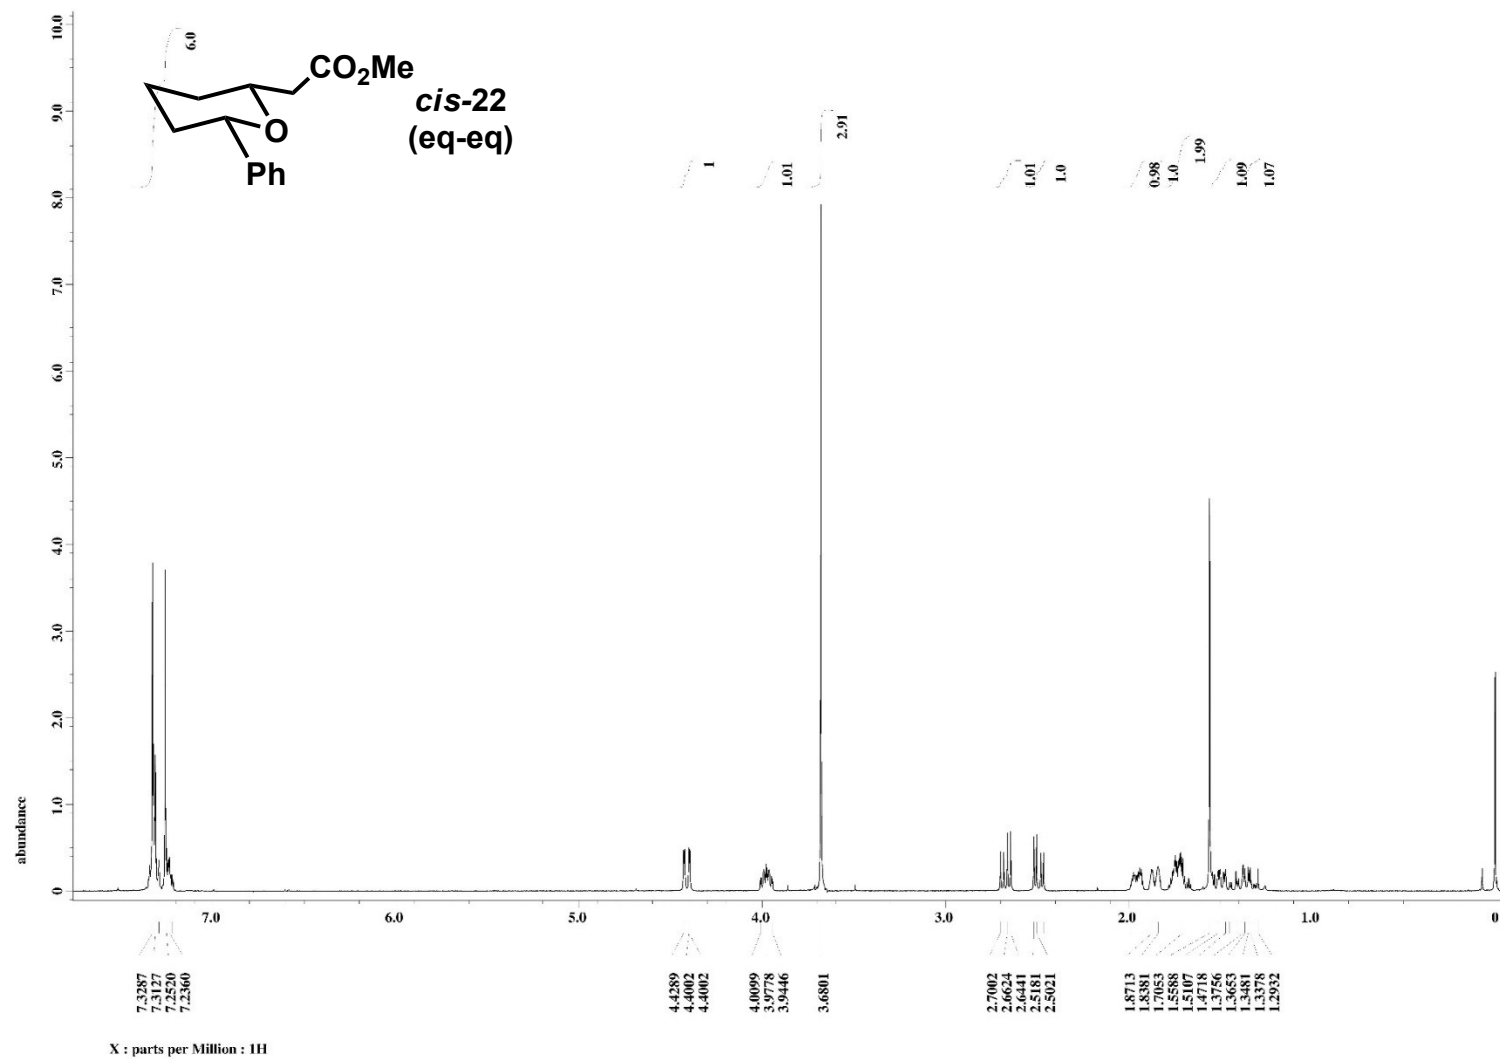

Figure 6 <sup>1</sup>H NMR spectrum of *cis*-22



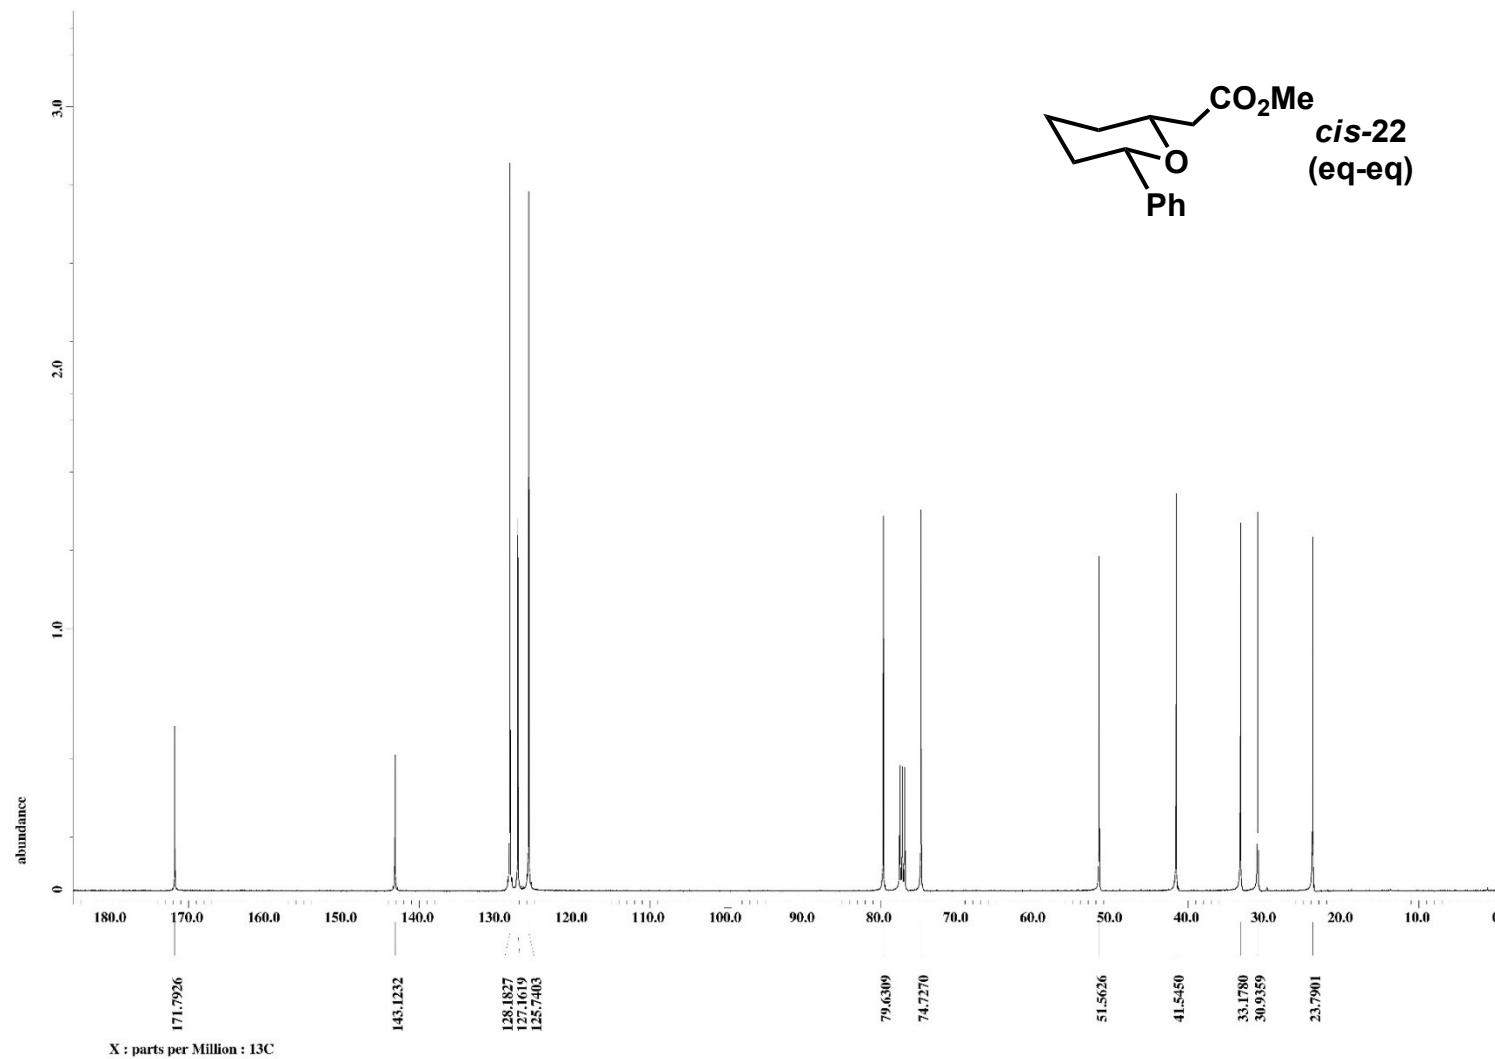

Figure 7 <sup>13</sup>C NMR spectrum of cis-22

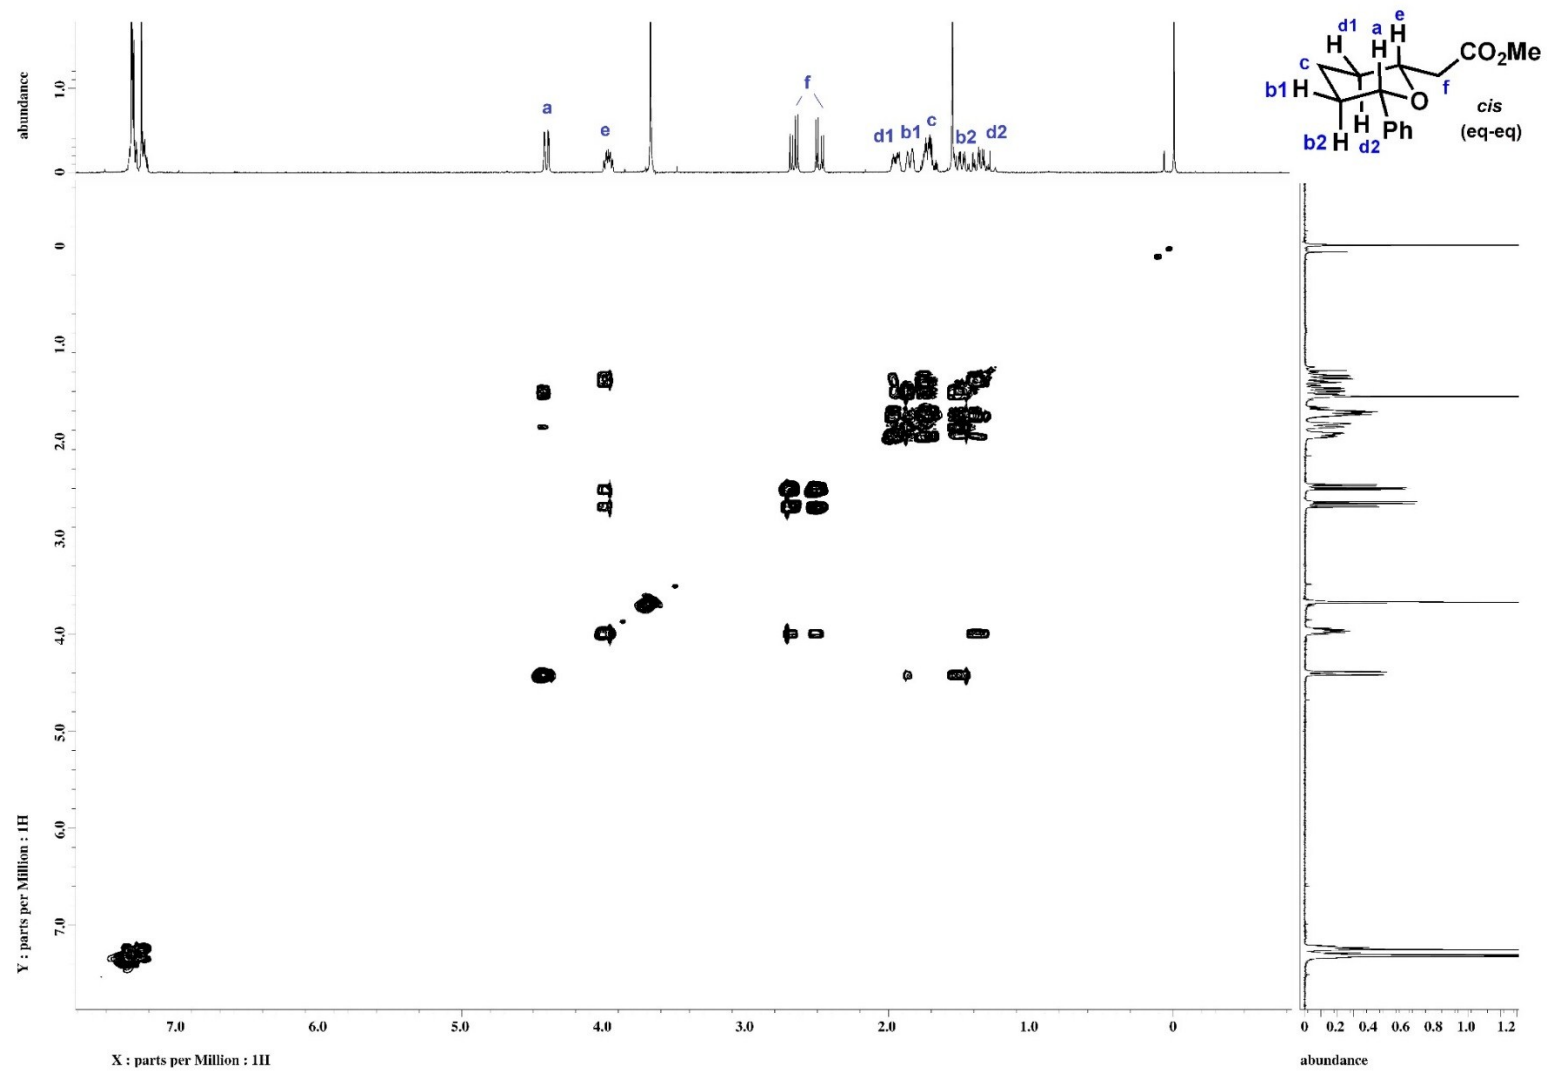

Figure 8 COSY spectrum of *cis*-22

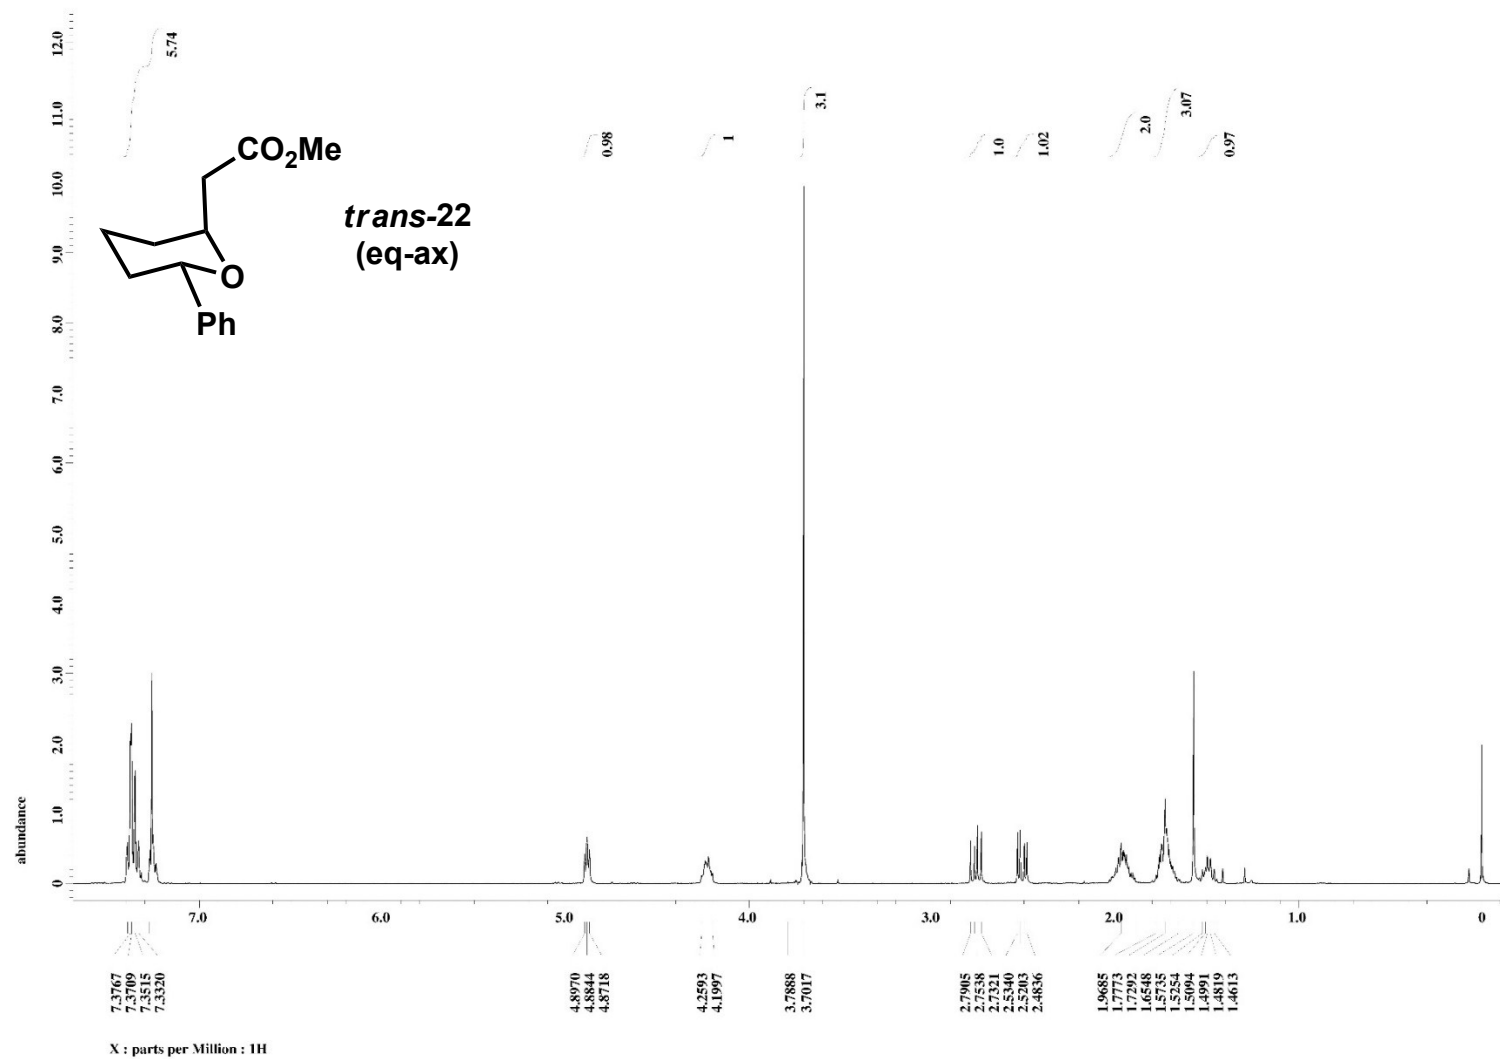

Figure 9 <sup>1</sup>H NMR spectrum of *trans*-22

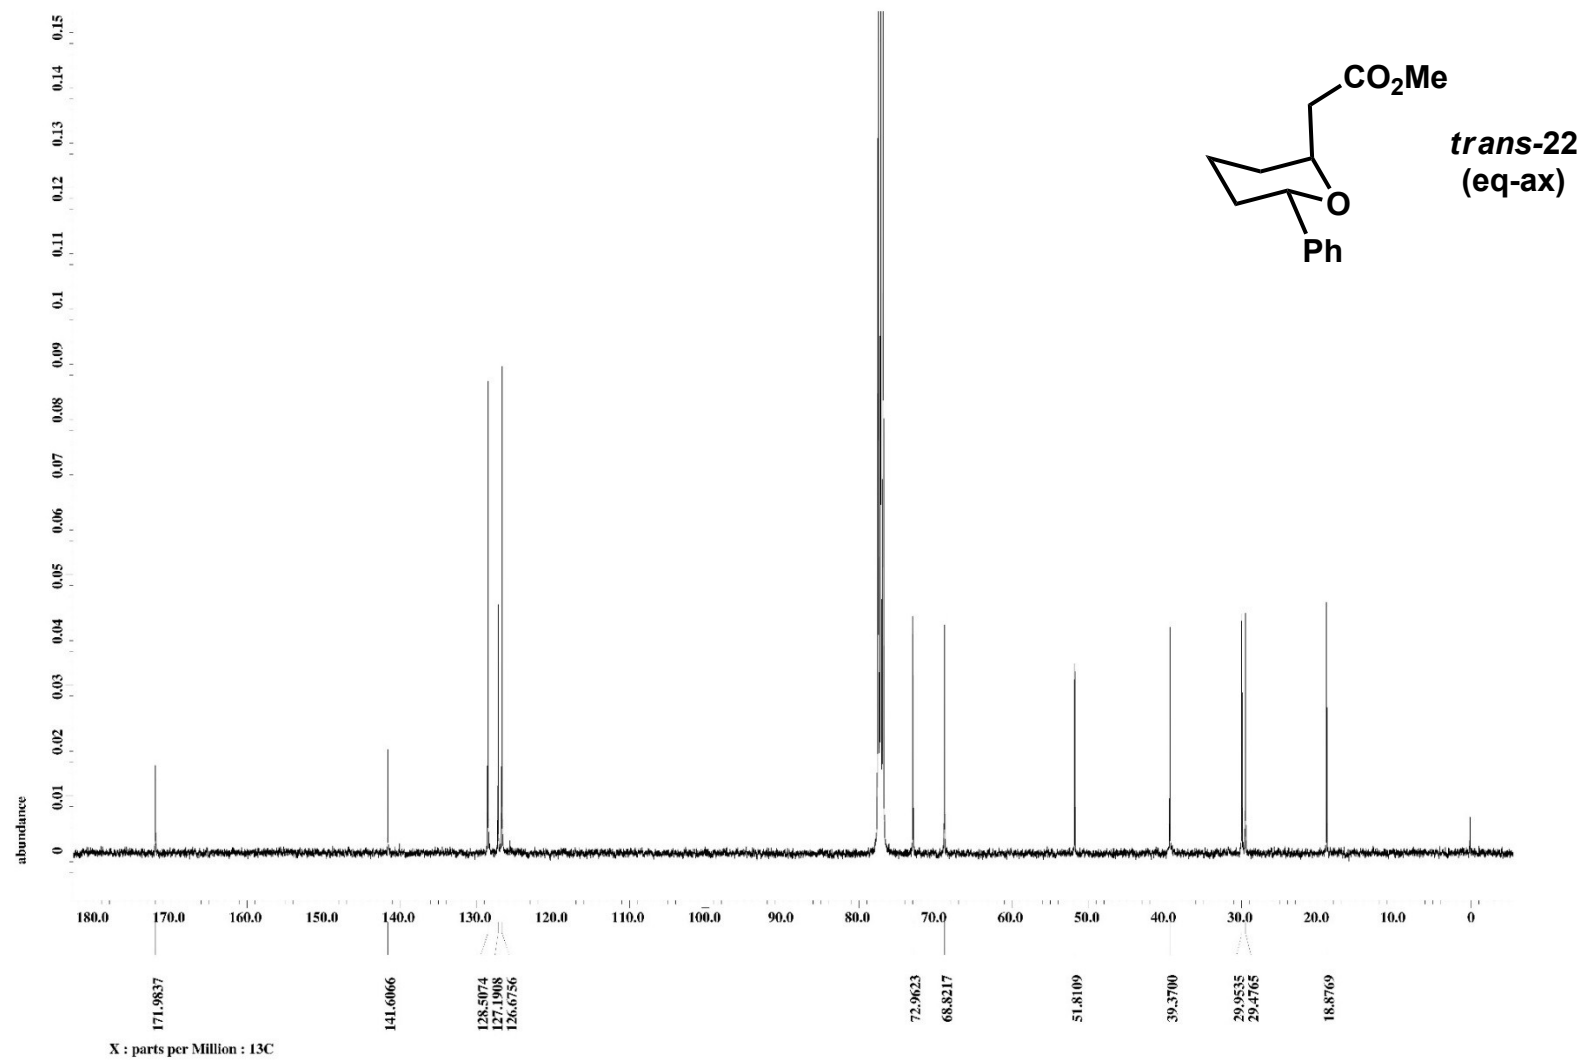

Figure 10  $^{13}\text{C}$  NMR spectrum of *trans*-22

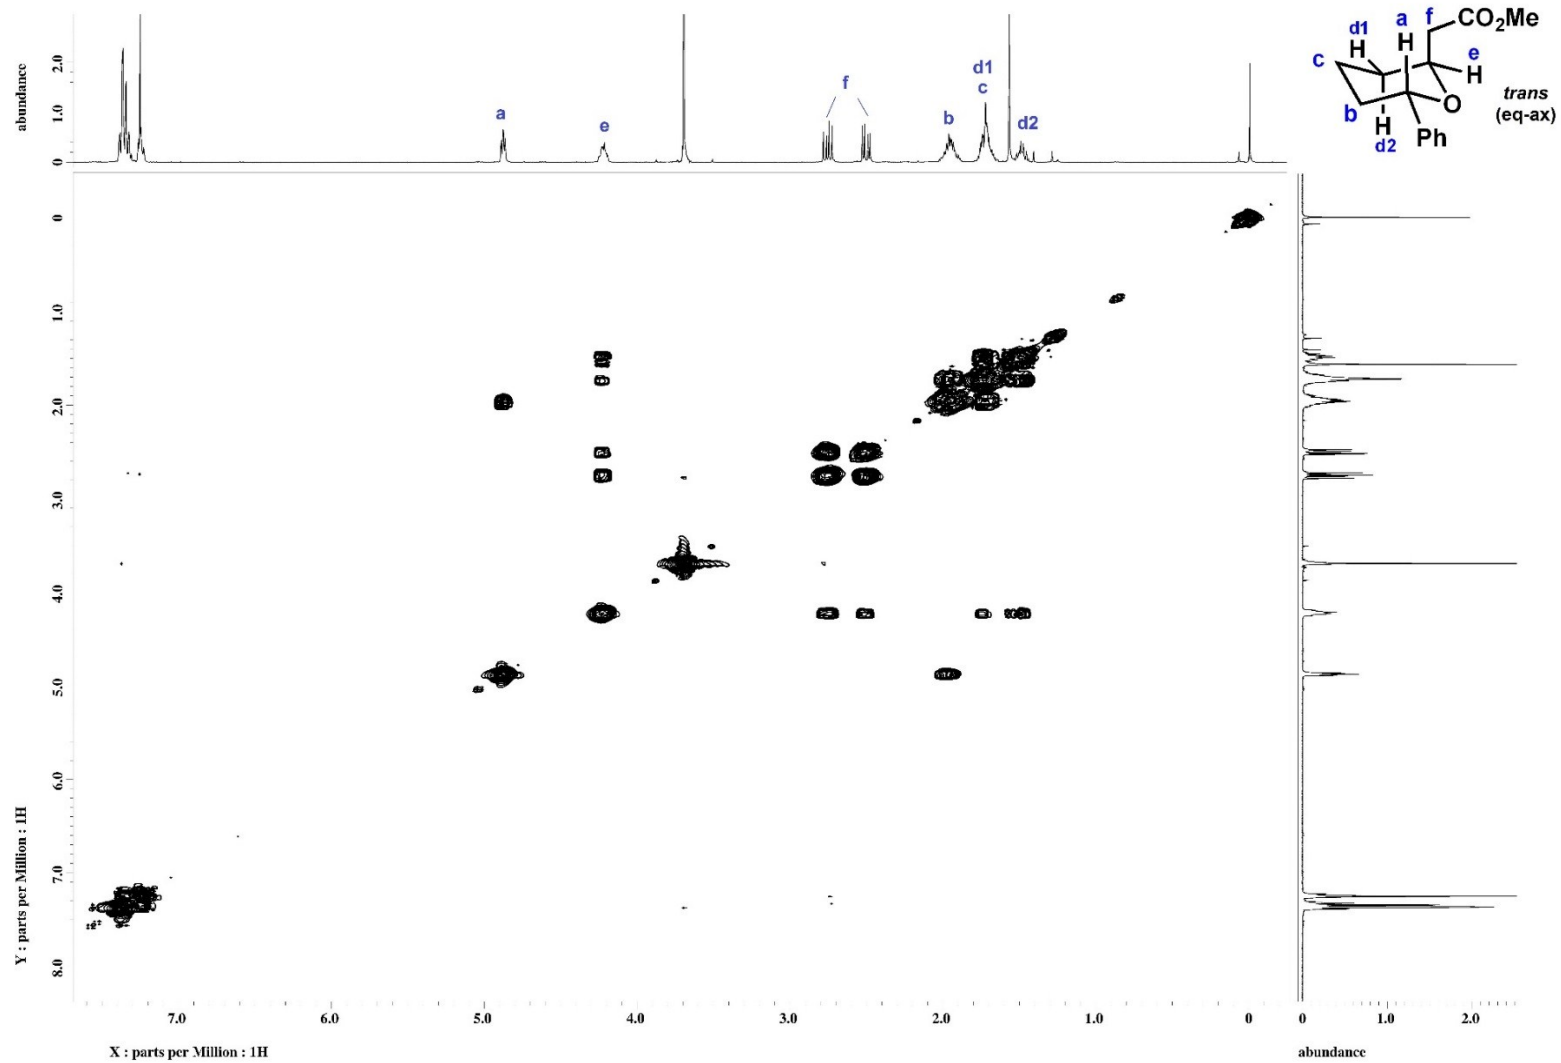

Figure 11 COSY spectrum of trans-22

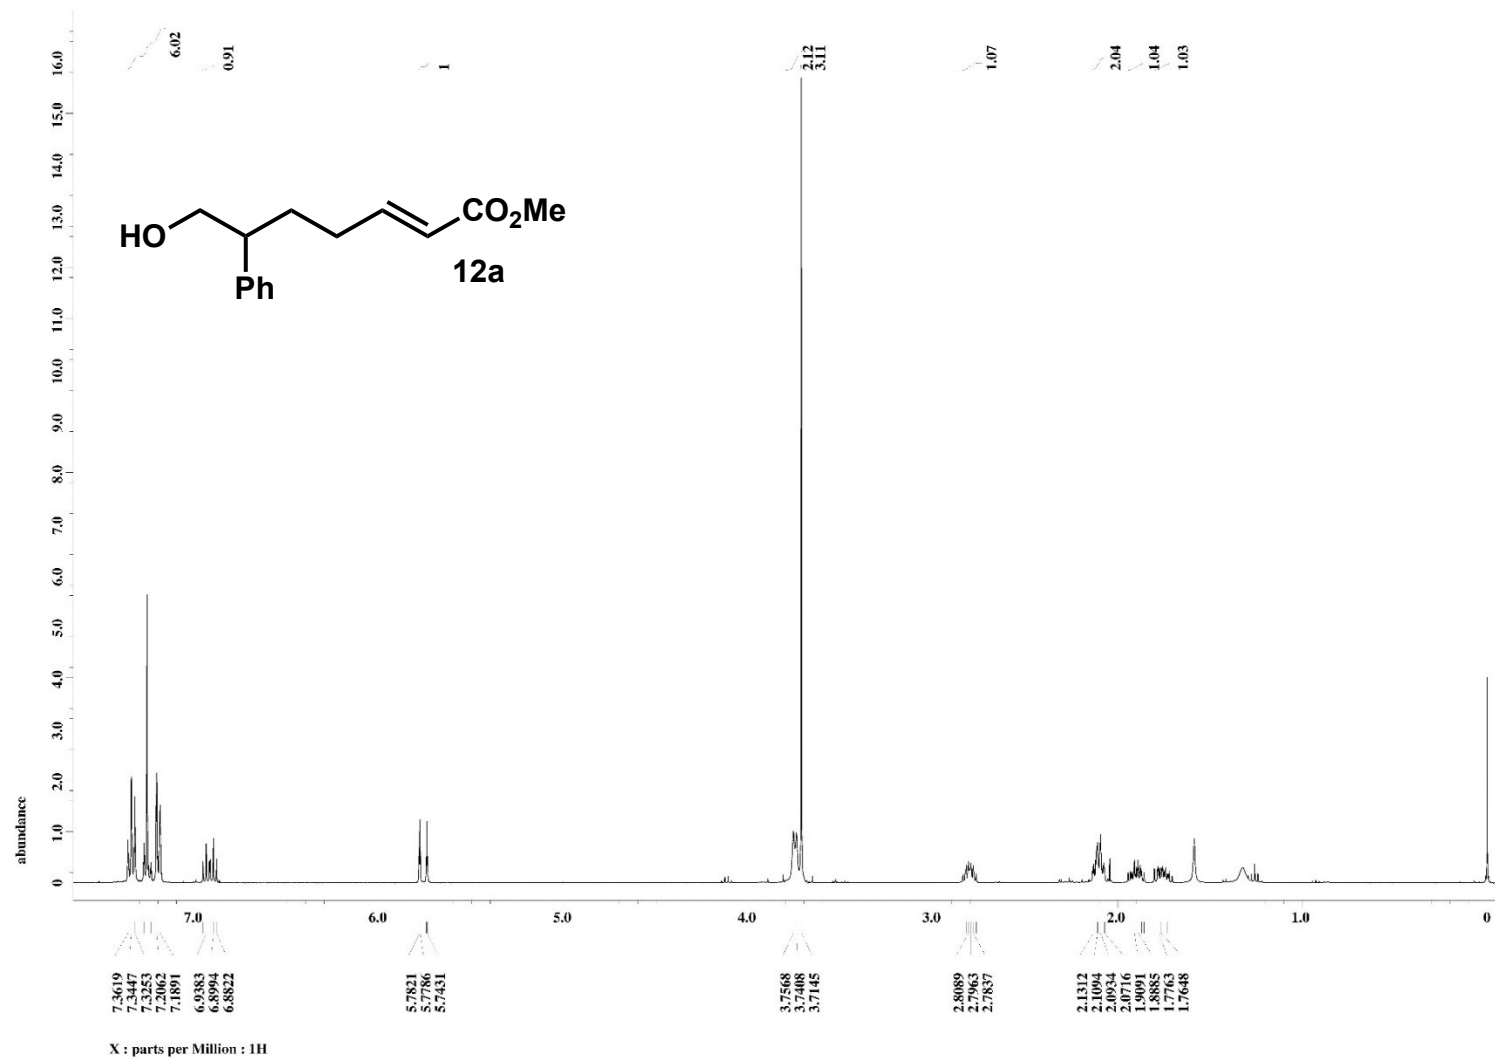

Figure 12 <sup>1</sup>H NMR spectrum of 12a

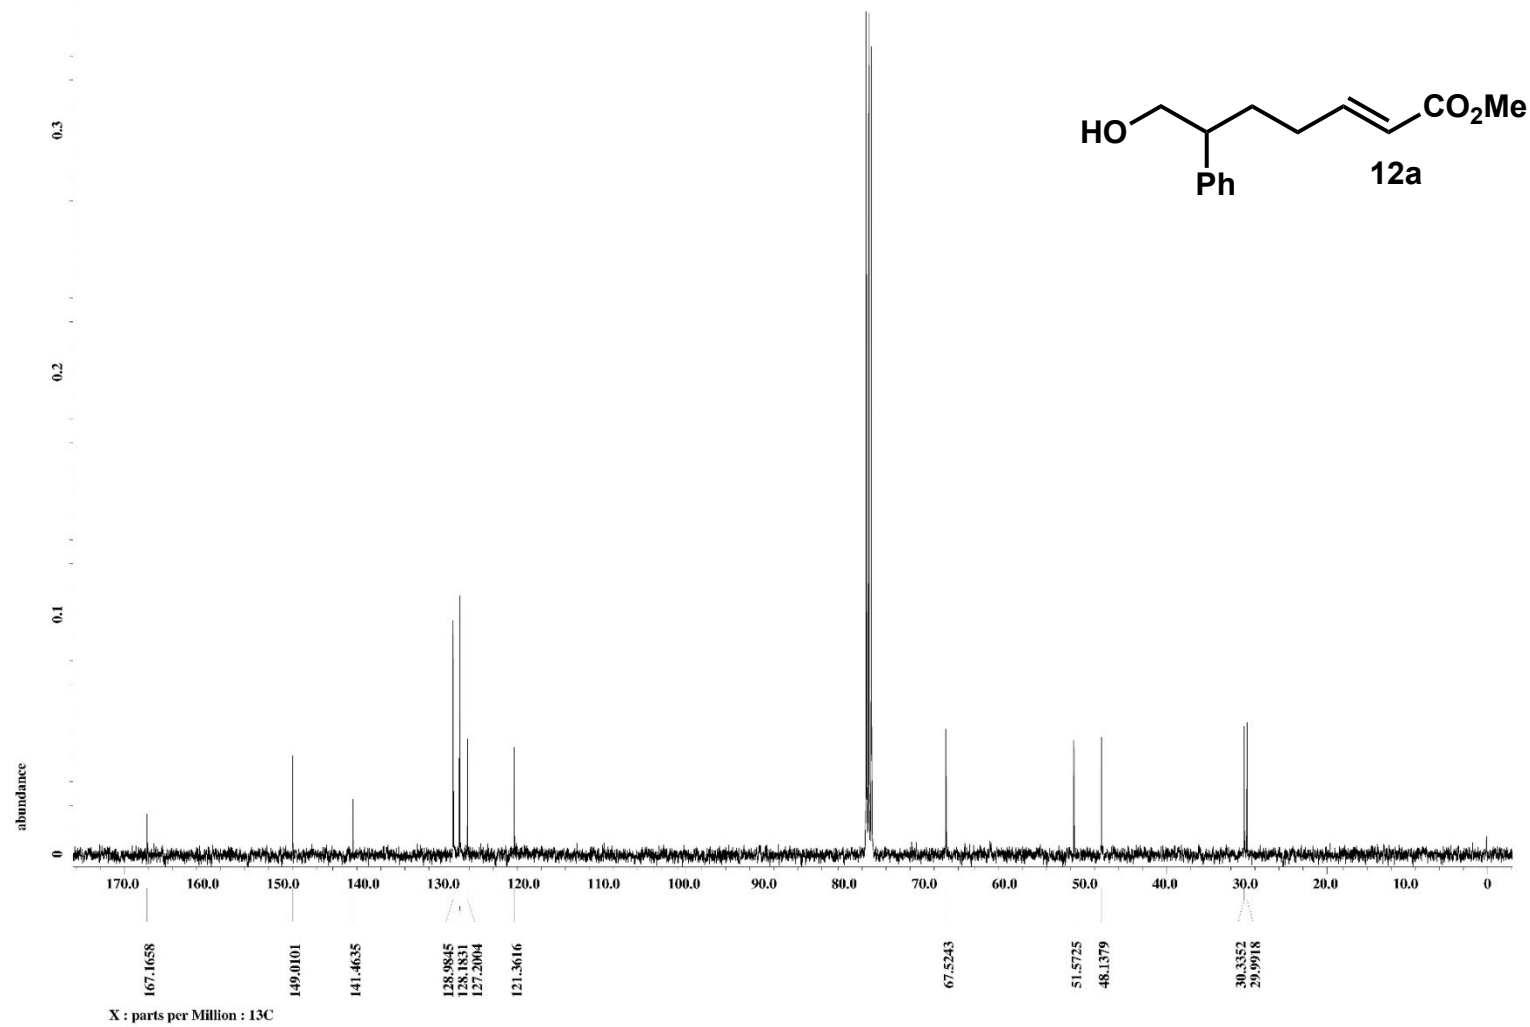

Figure 13 <sup>13</sup>C NMR spectrum of 12a

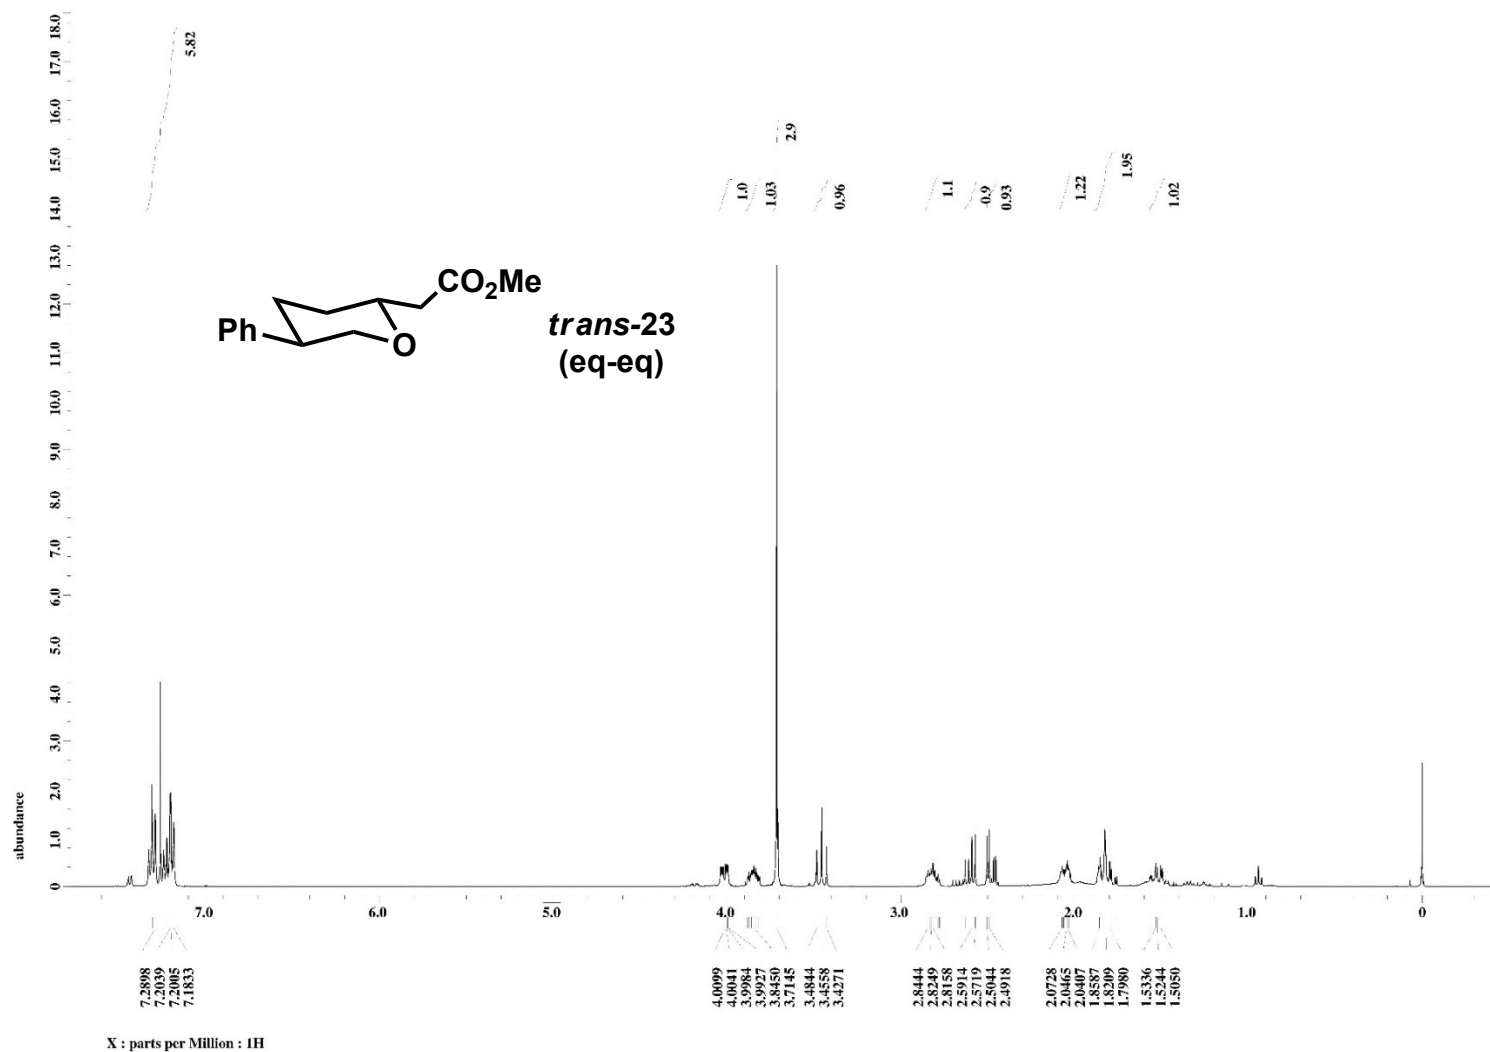

Figure 14 <sup>1</sup>H NMR spectrum of *trans*-23



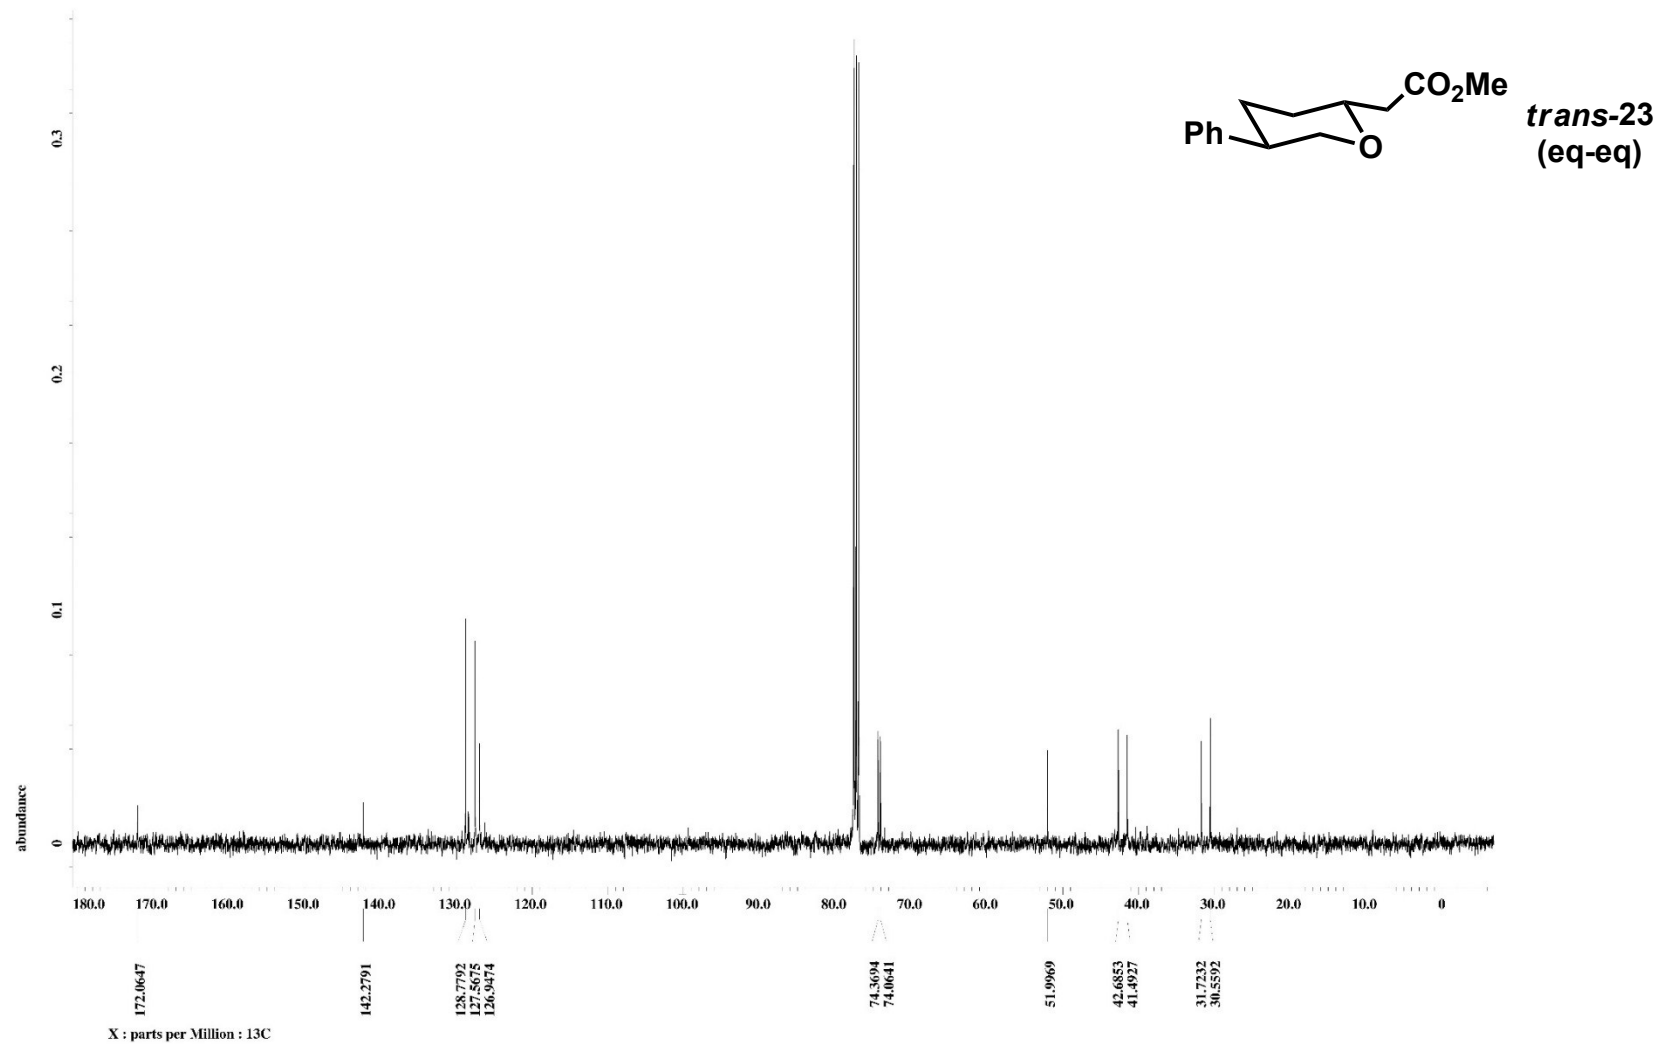

Figure 15 <sup>13</sup>C NMR spectrum of *trans*-23

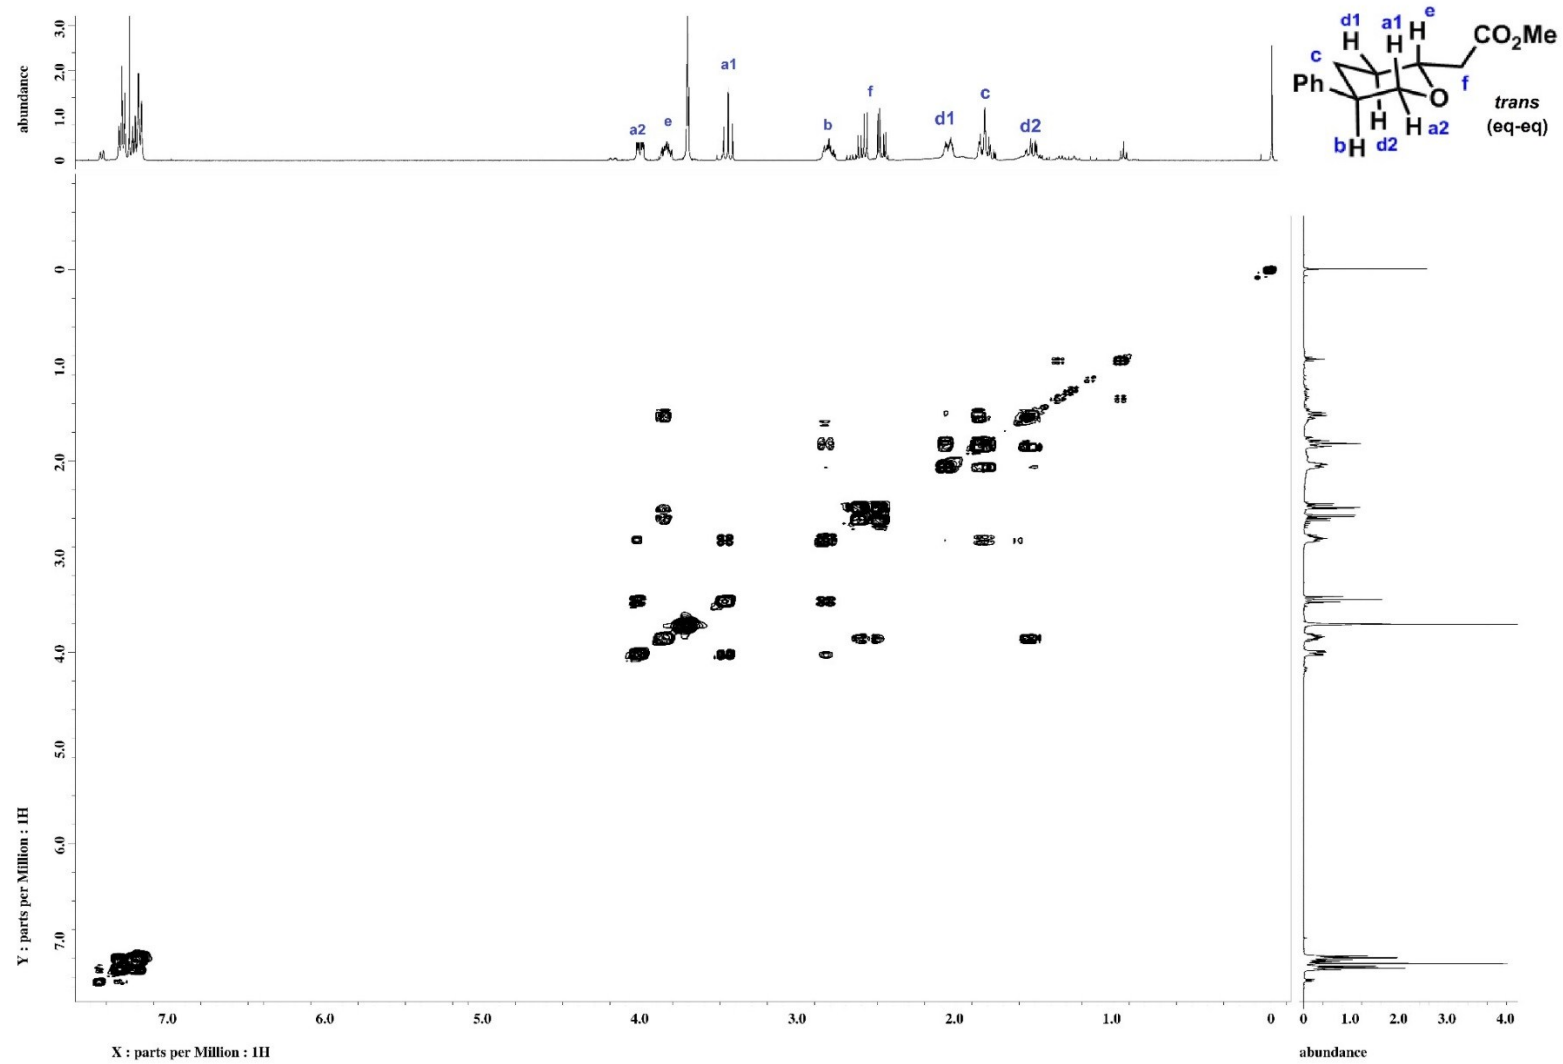

Figure 16 COSY spectrum of trans-23

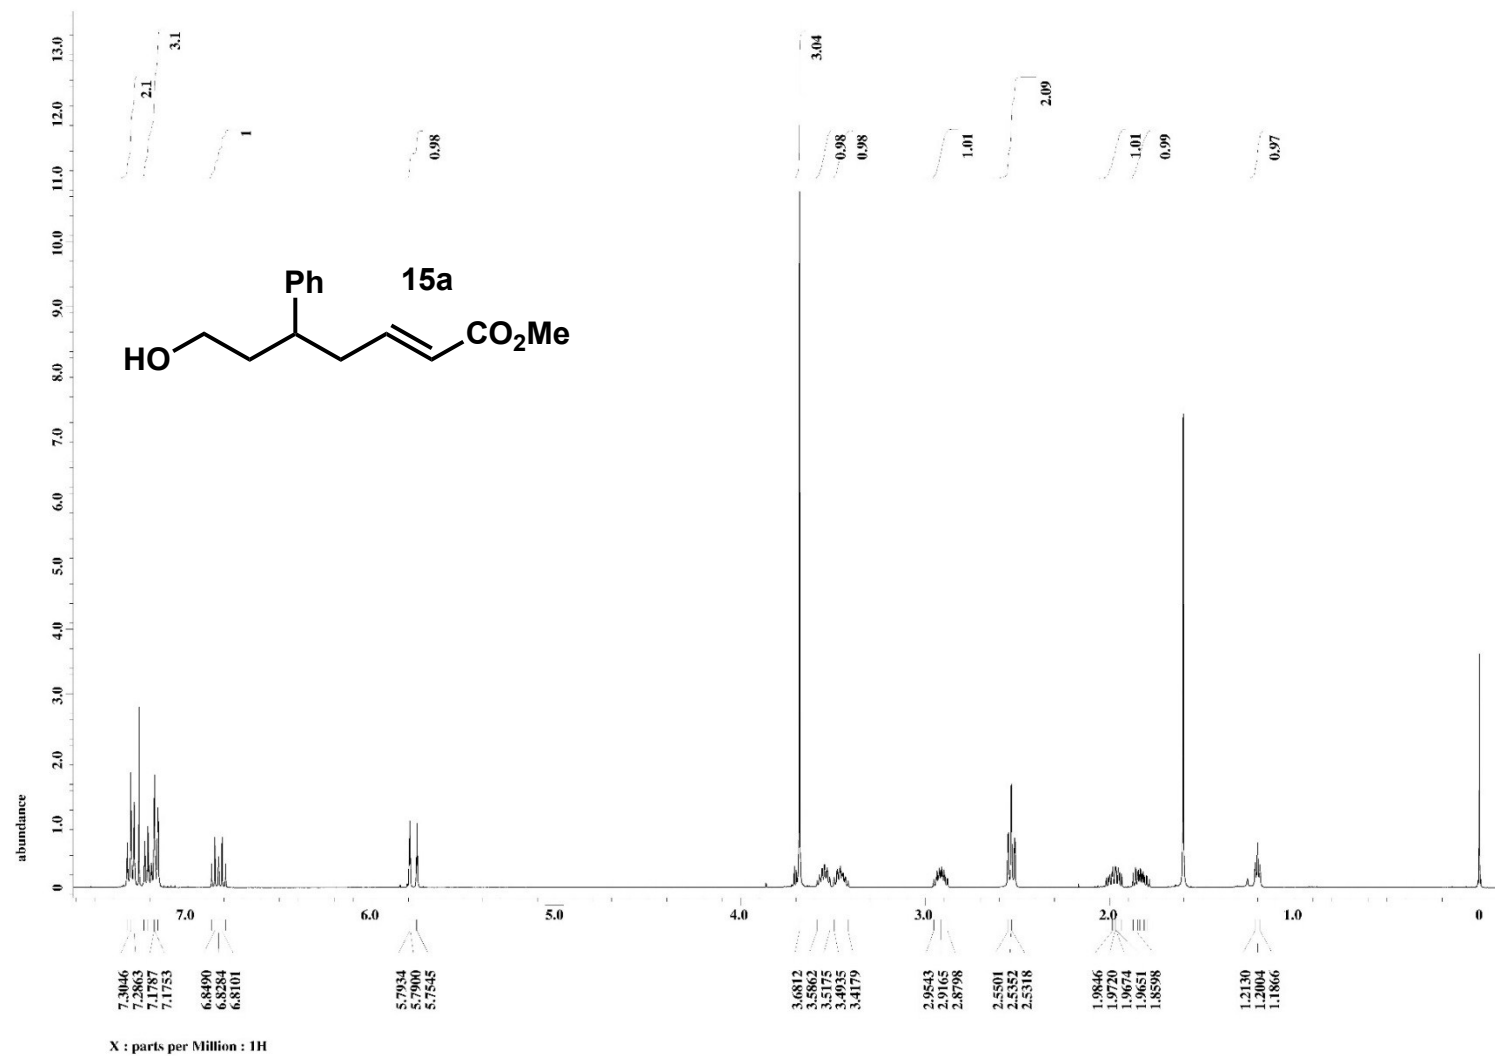

Figure 17 <sup>1</sup>H NMR spectrum of 15a

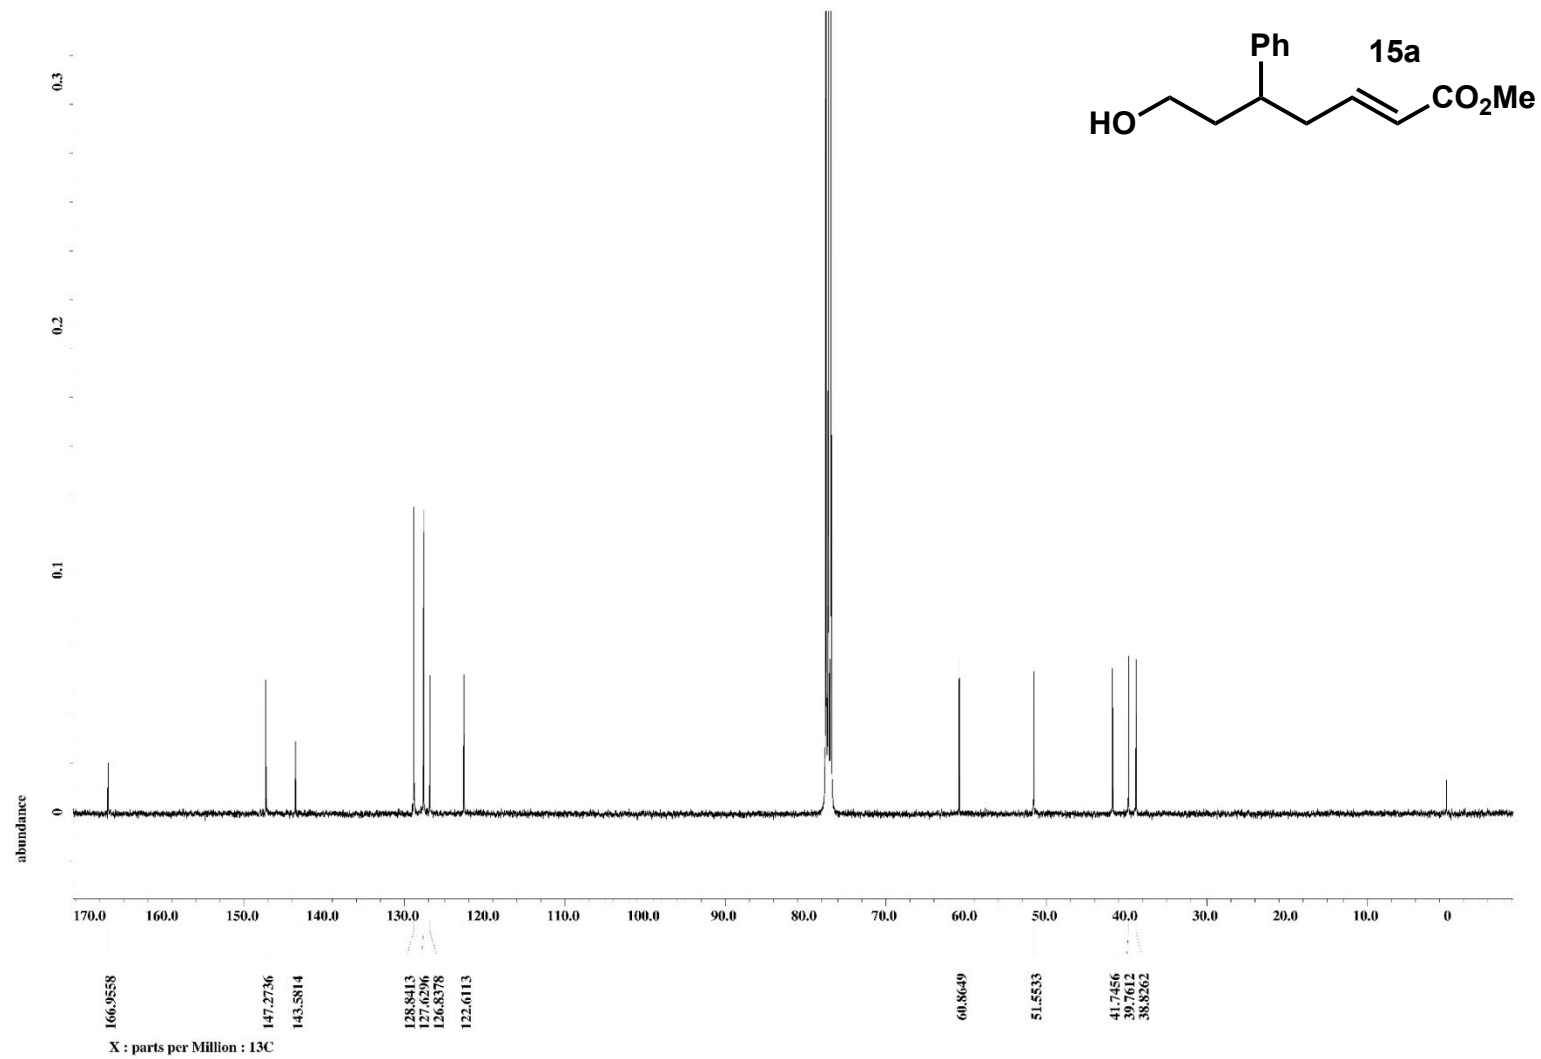

Figure 18  $^{13}\text{C}$  NMR spectrum of 15a

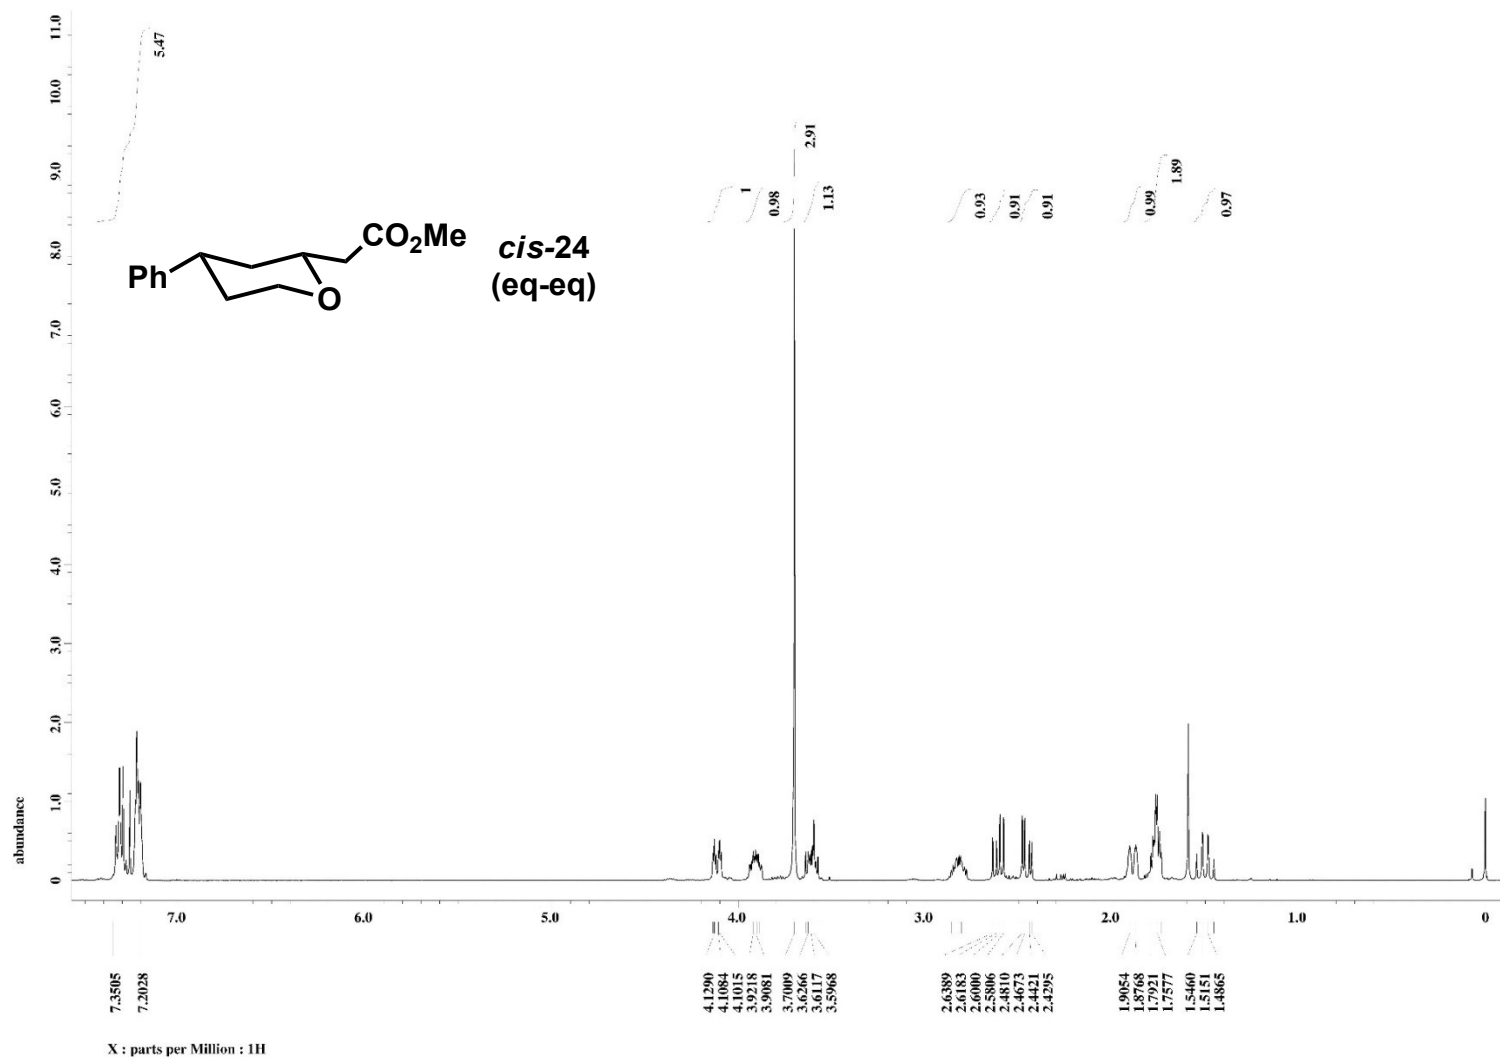

Figure 19 <sup>1</sup>H NMR spectrum of *cis*-24

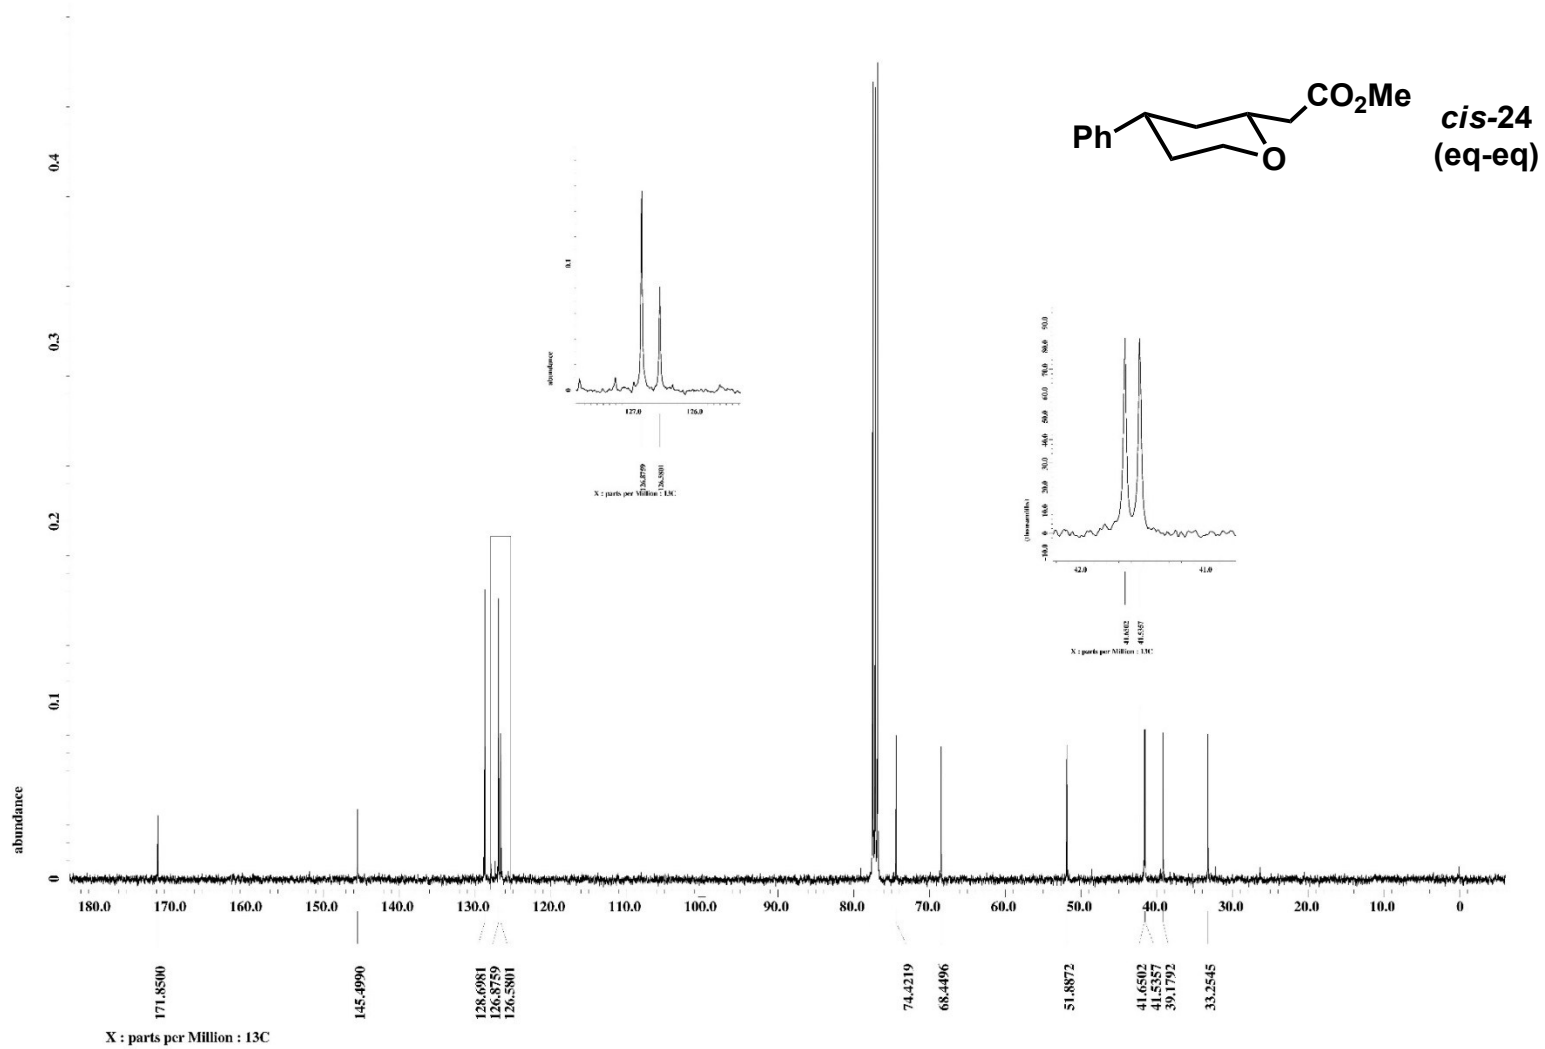

Figure 20 <sup>13</sup>C NMR spectrum of *cis*-24

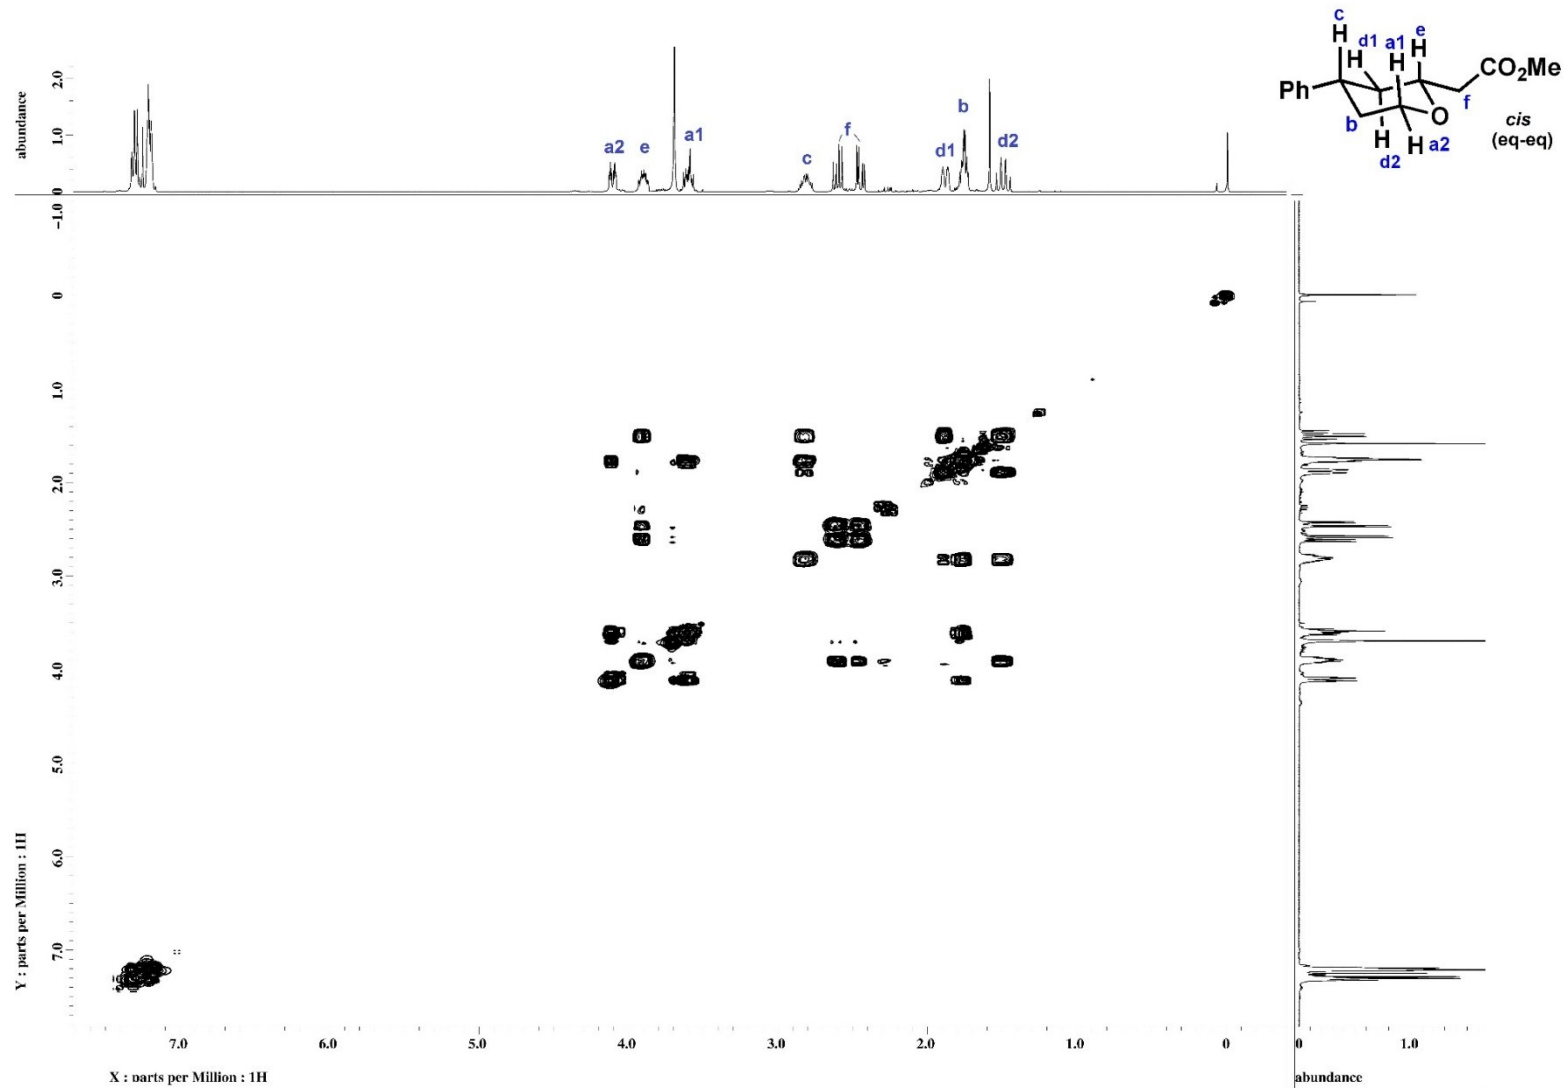

Figure 21 COSY spectrum of *cis*-24

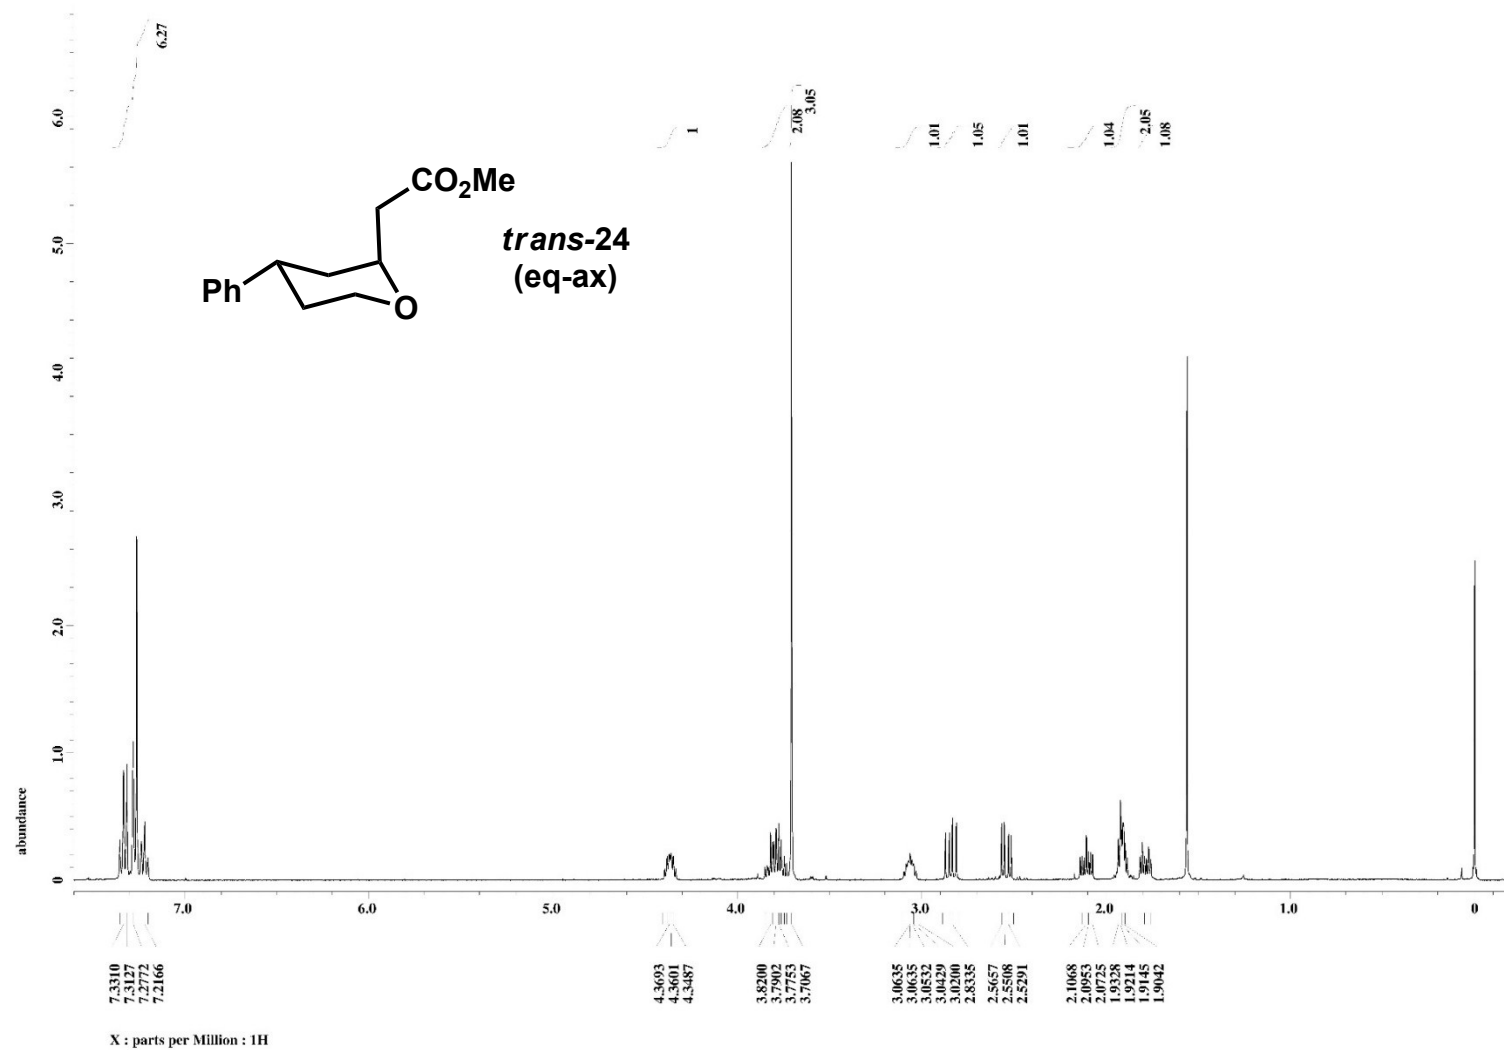

Figure 22 <sup>1</sup>H NMR spectrum of *trans*-24



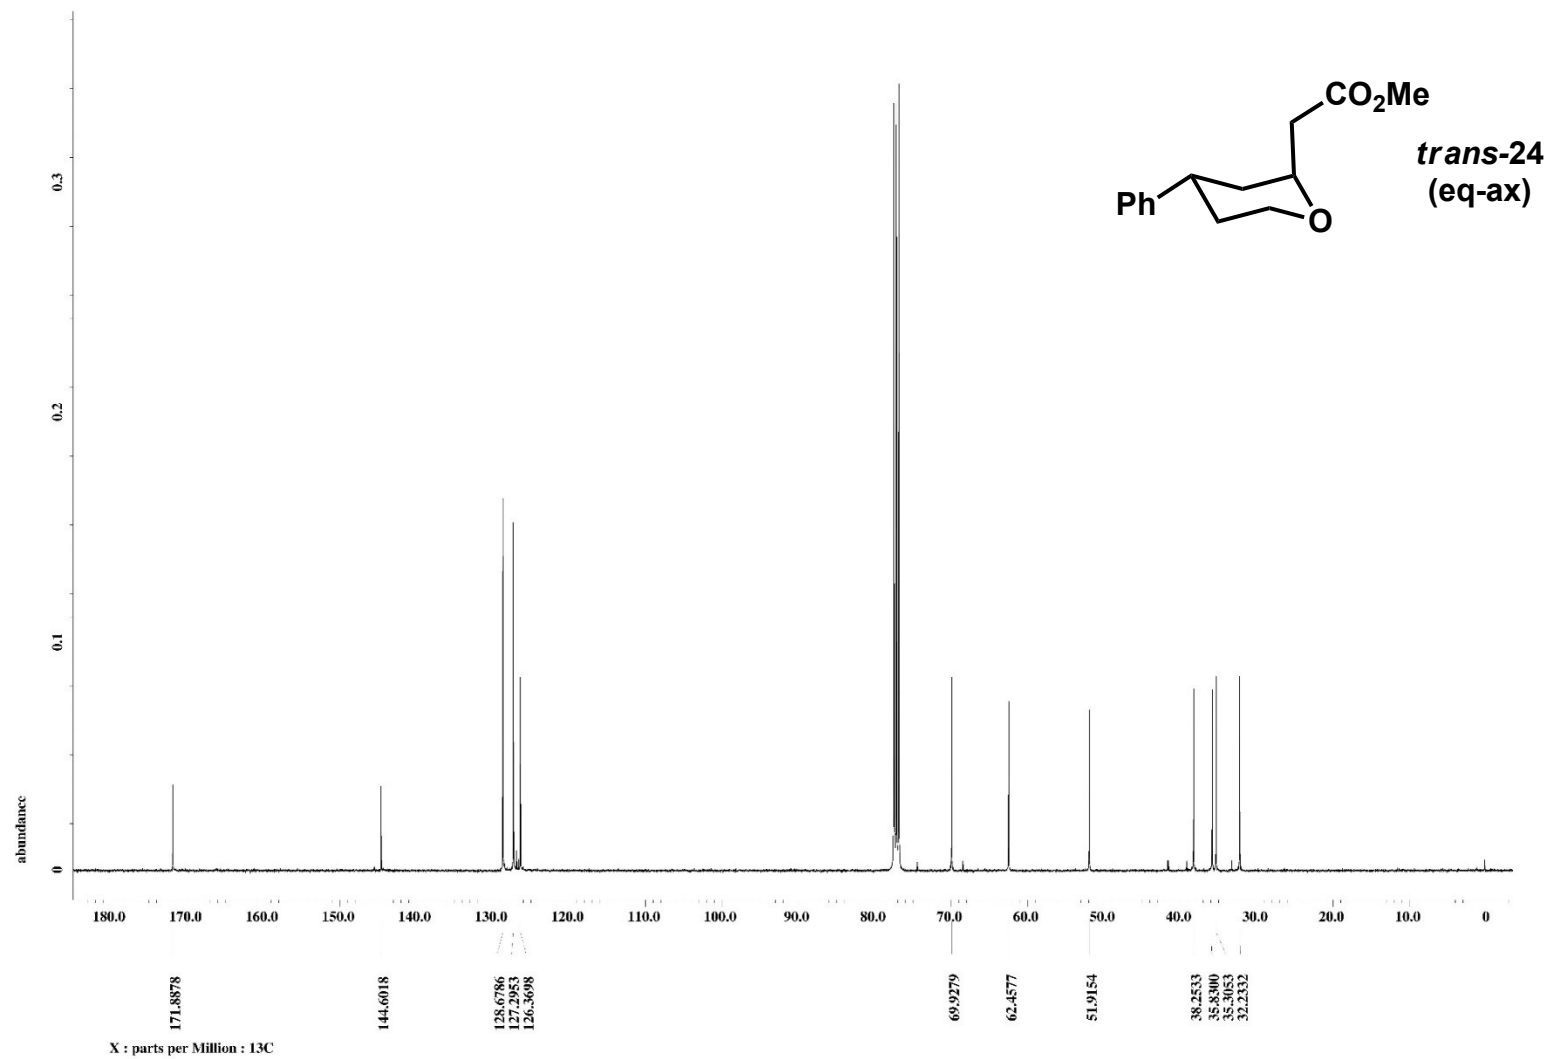

Figure 23 <sup>13</sup>C NMR spectrum of *trans*-24

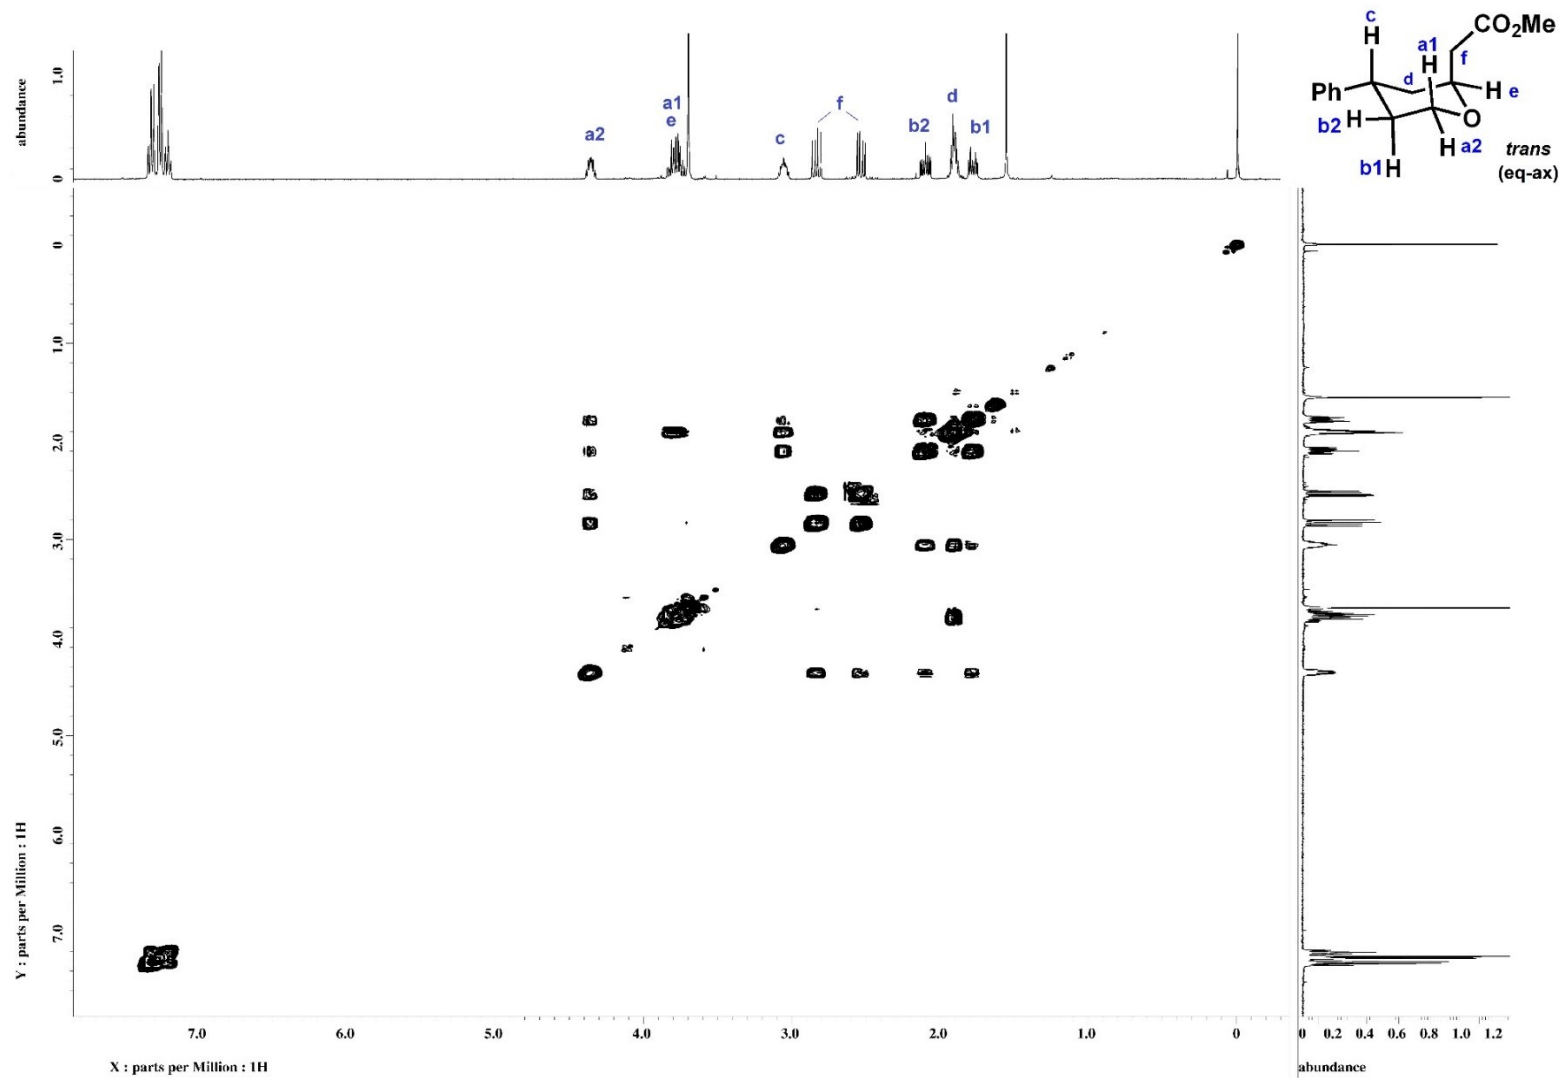

Figure 24 COSY spectrum of trans-24

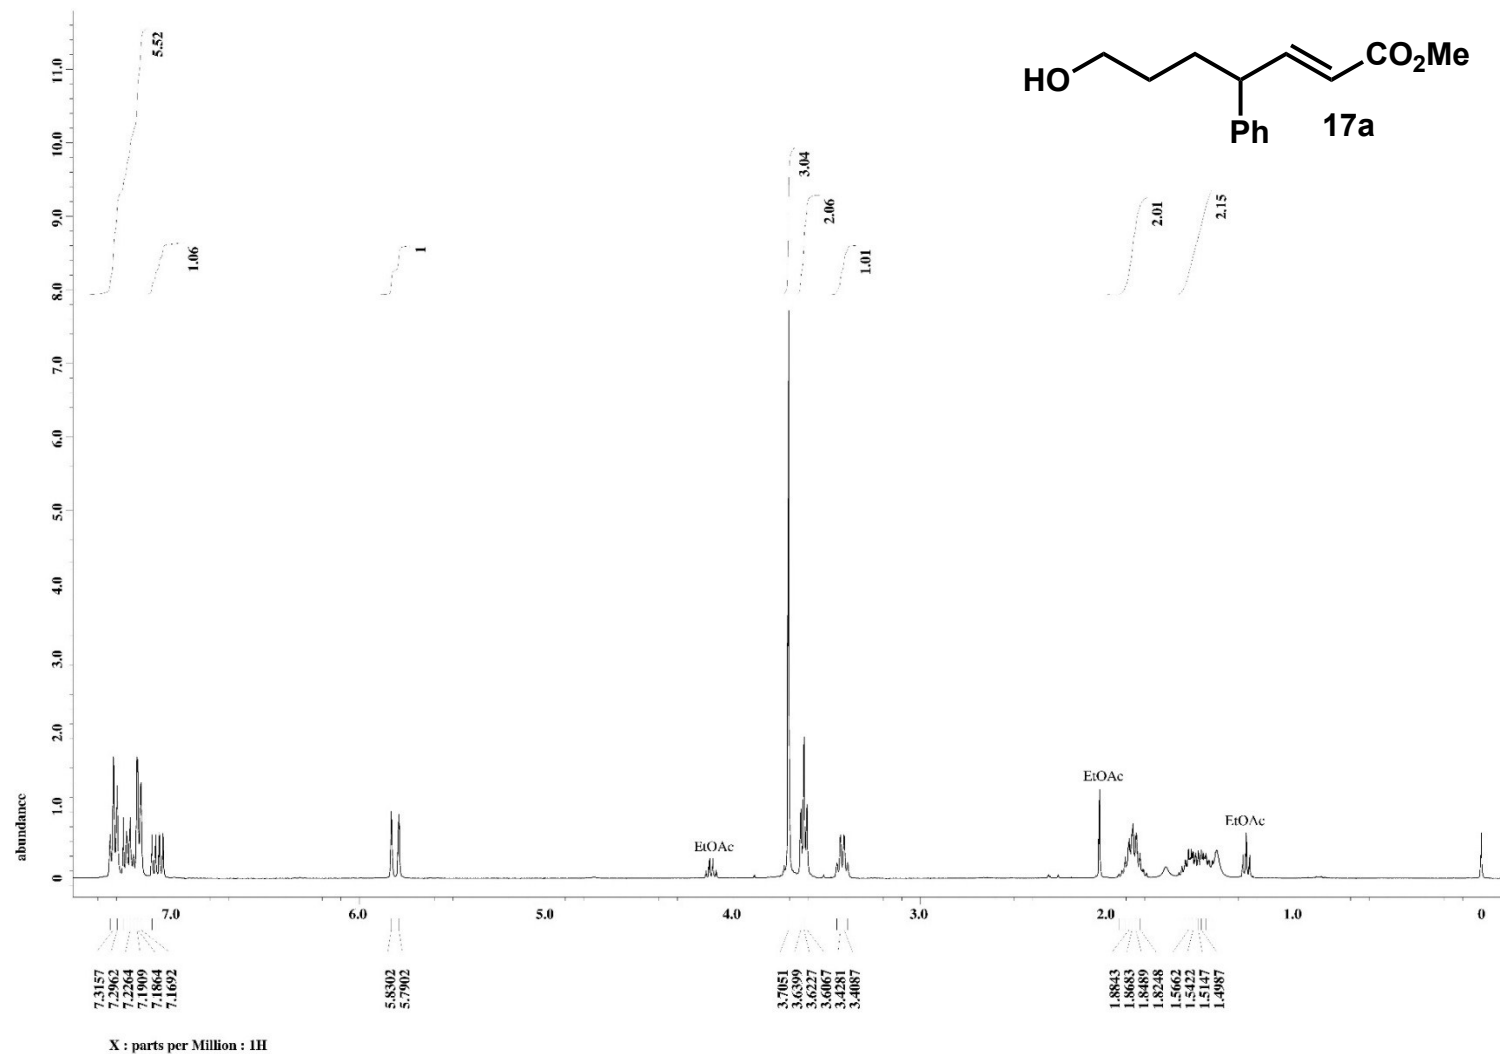

Figure 25 <sup>1</sup>H NMR spectrum of 17a

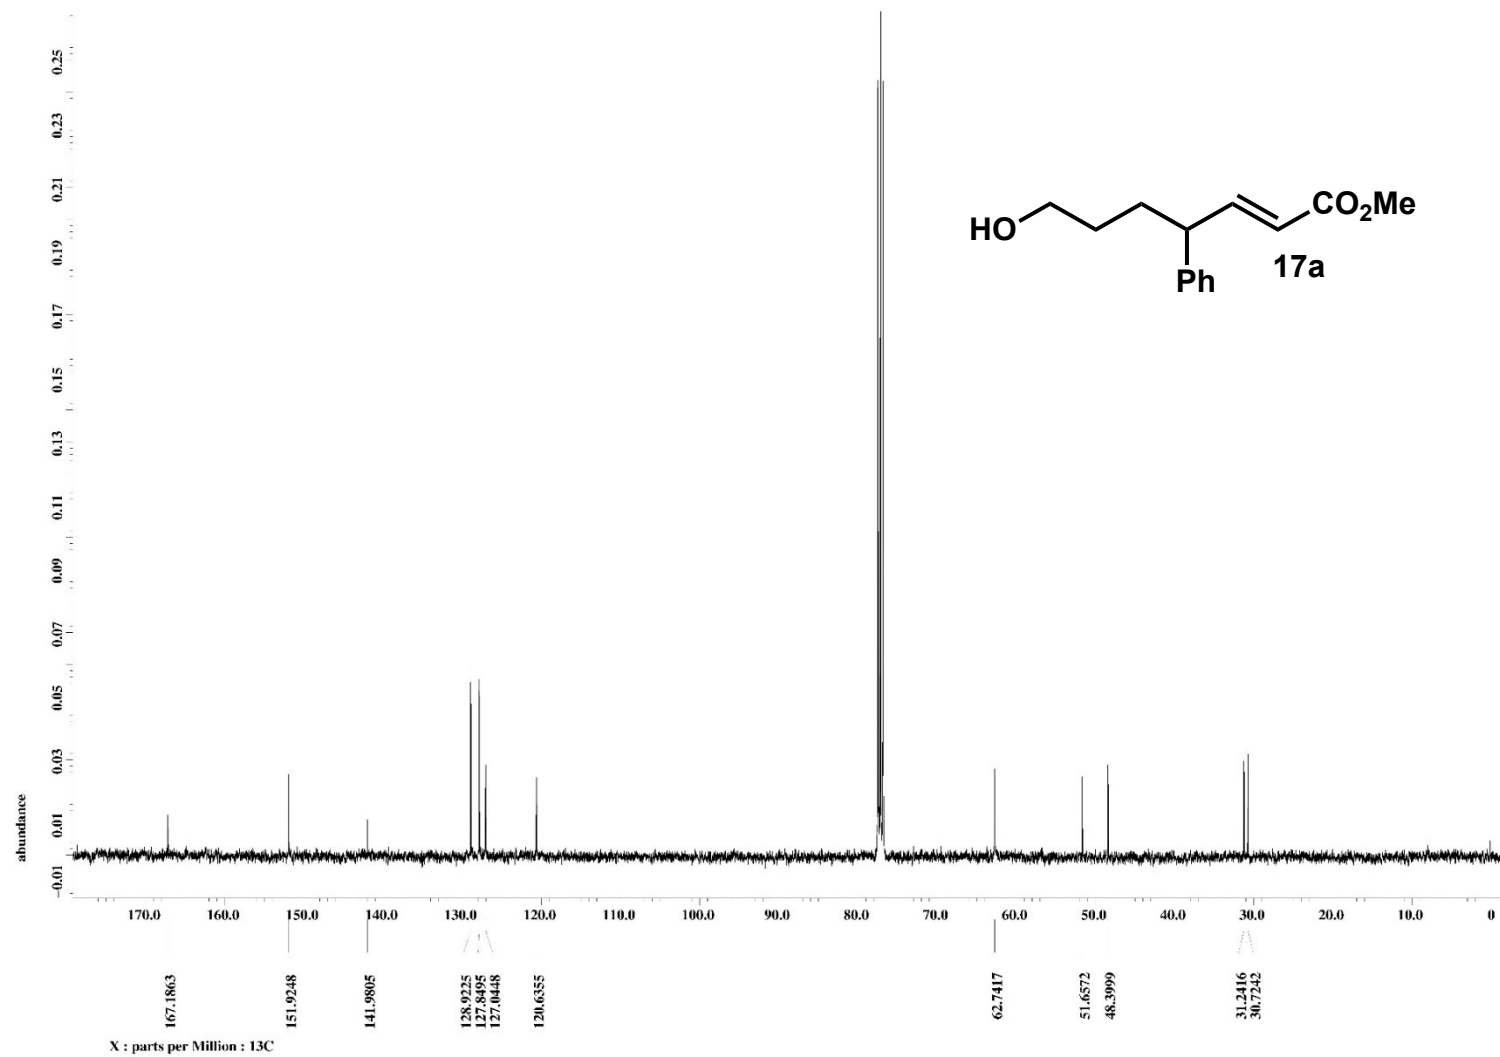

Figure 26  $^{13}\text{C}$  NMR spectrum of 17a

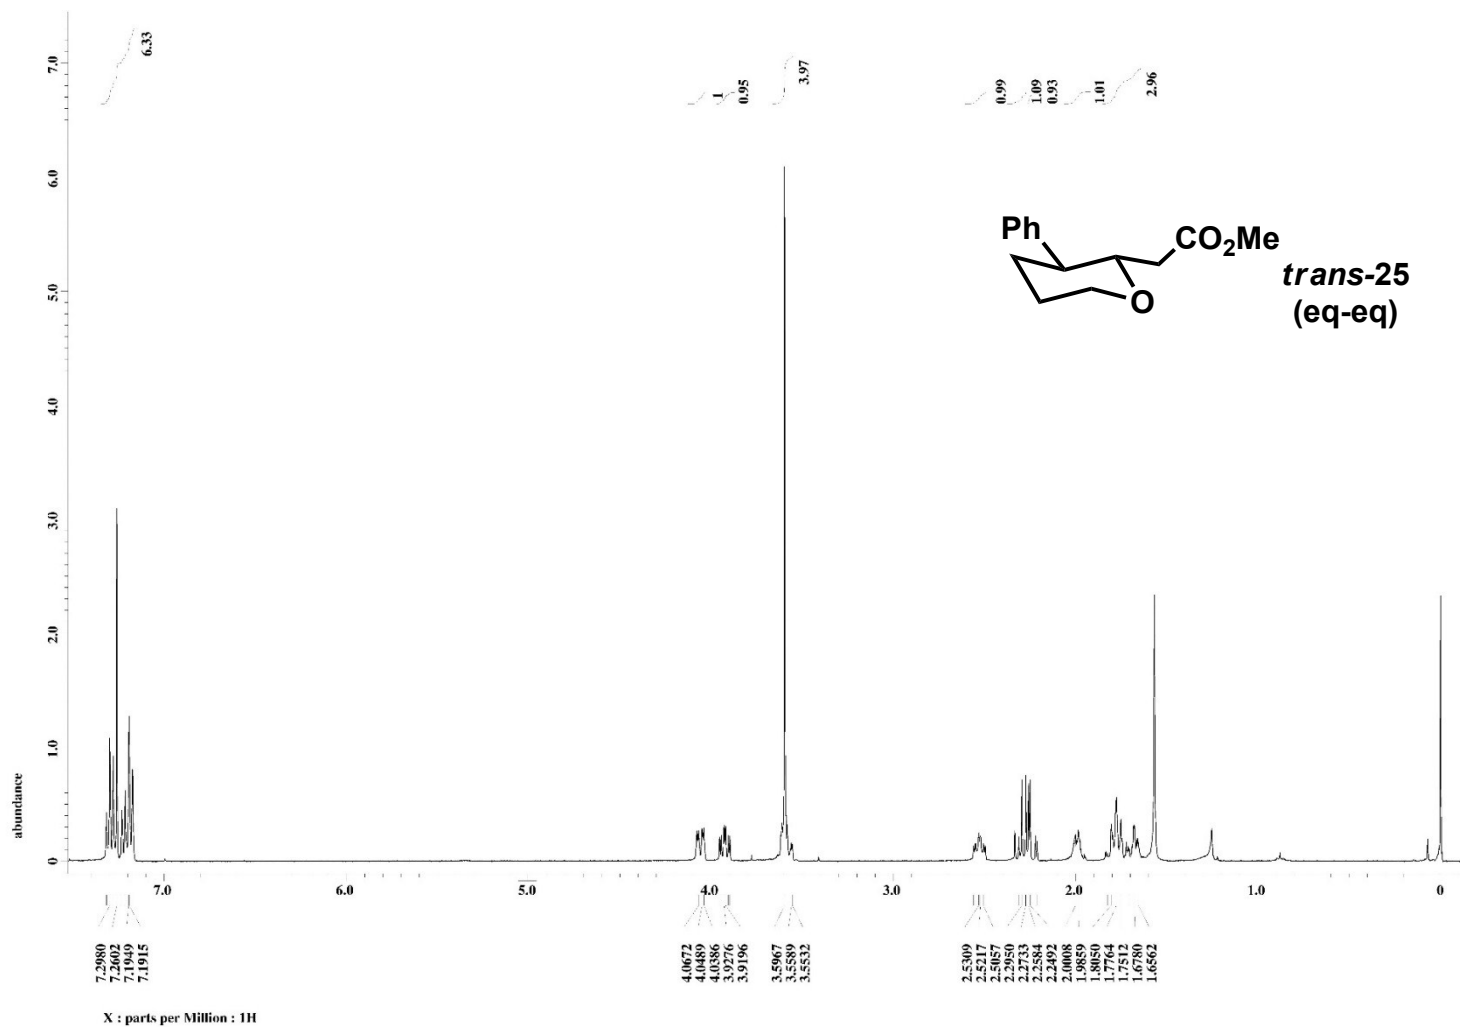

Figure 27 <sup>1</sup>H NMR spectrum of *trans*-25

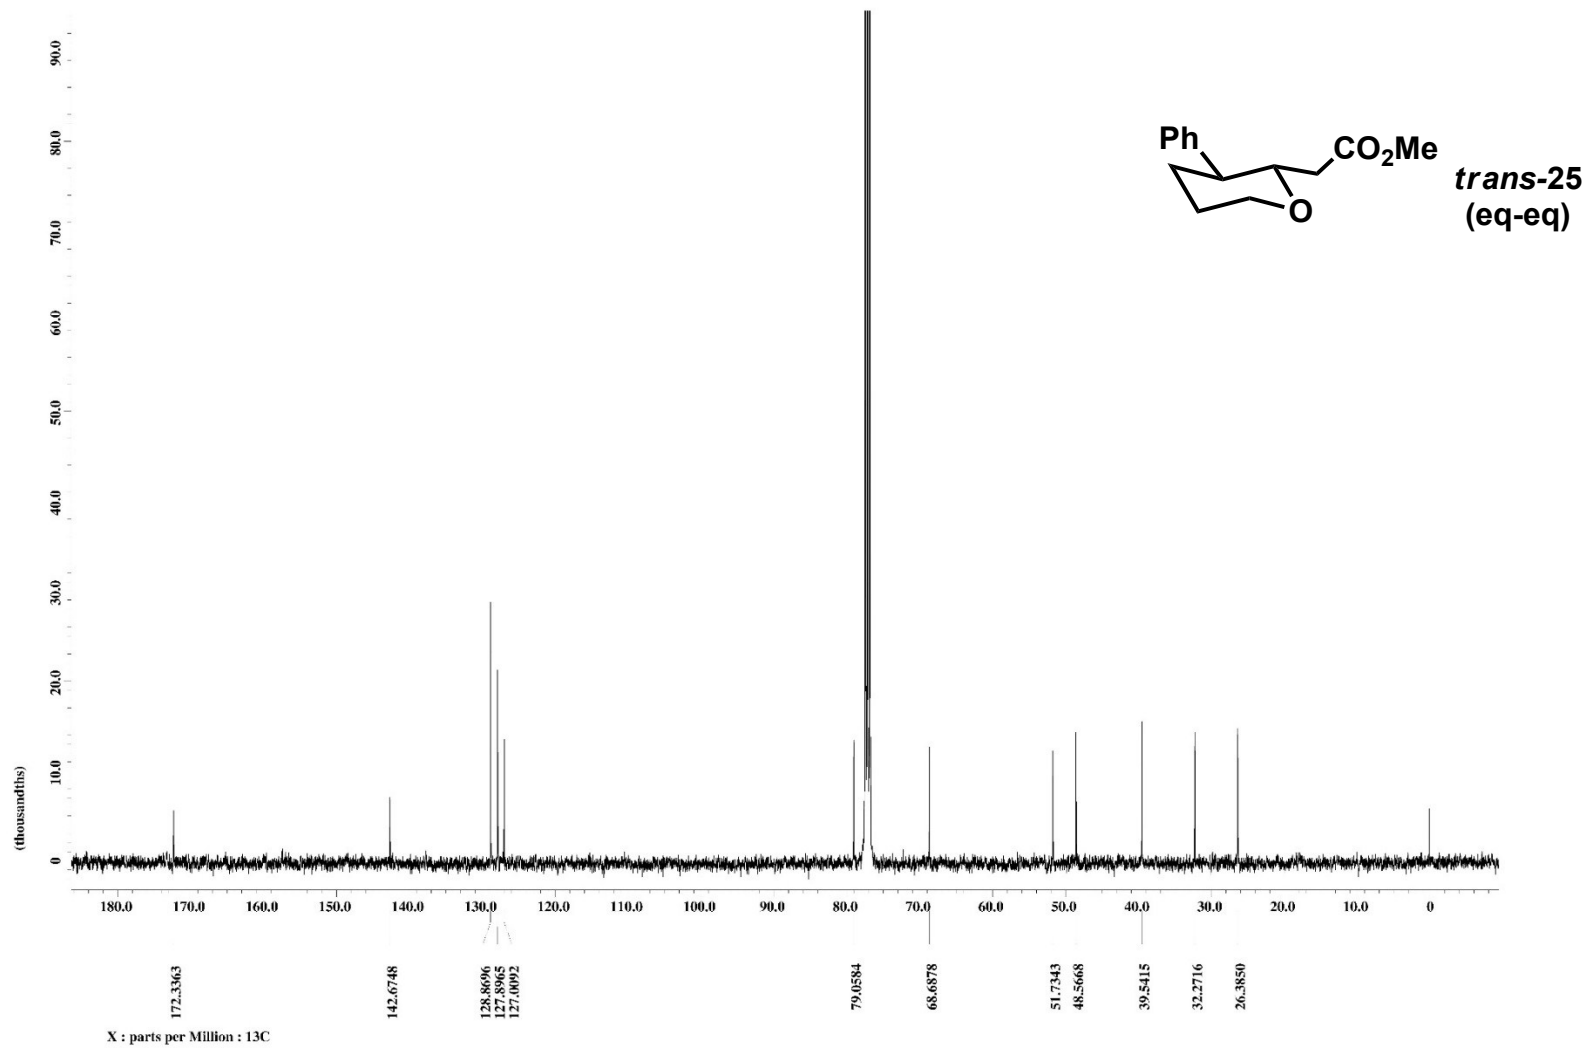

Figure 28  $^{13}\text{C}$  NMR spectrum of *trans*-25

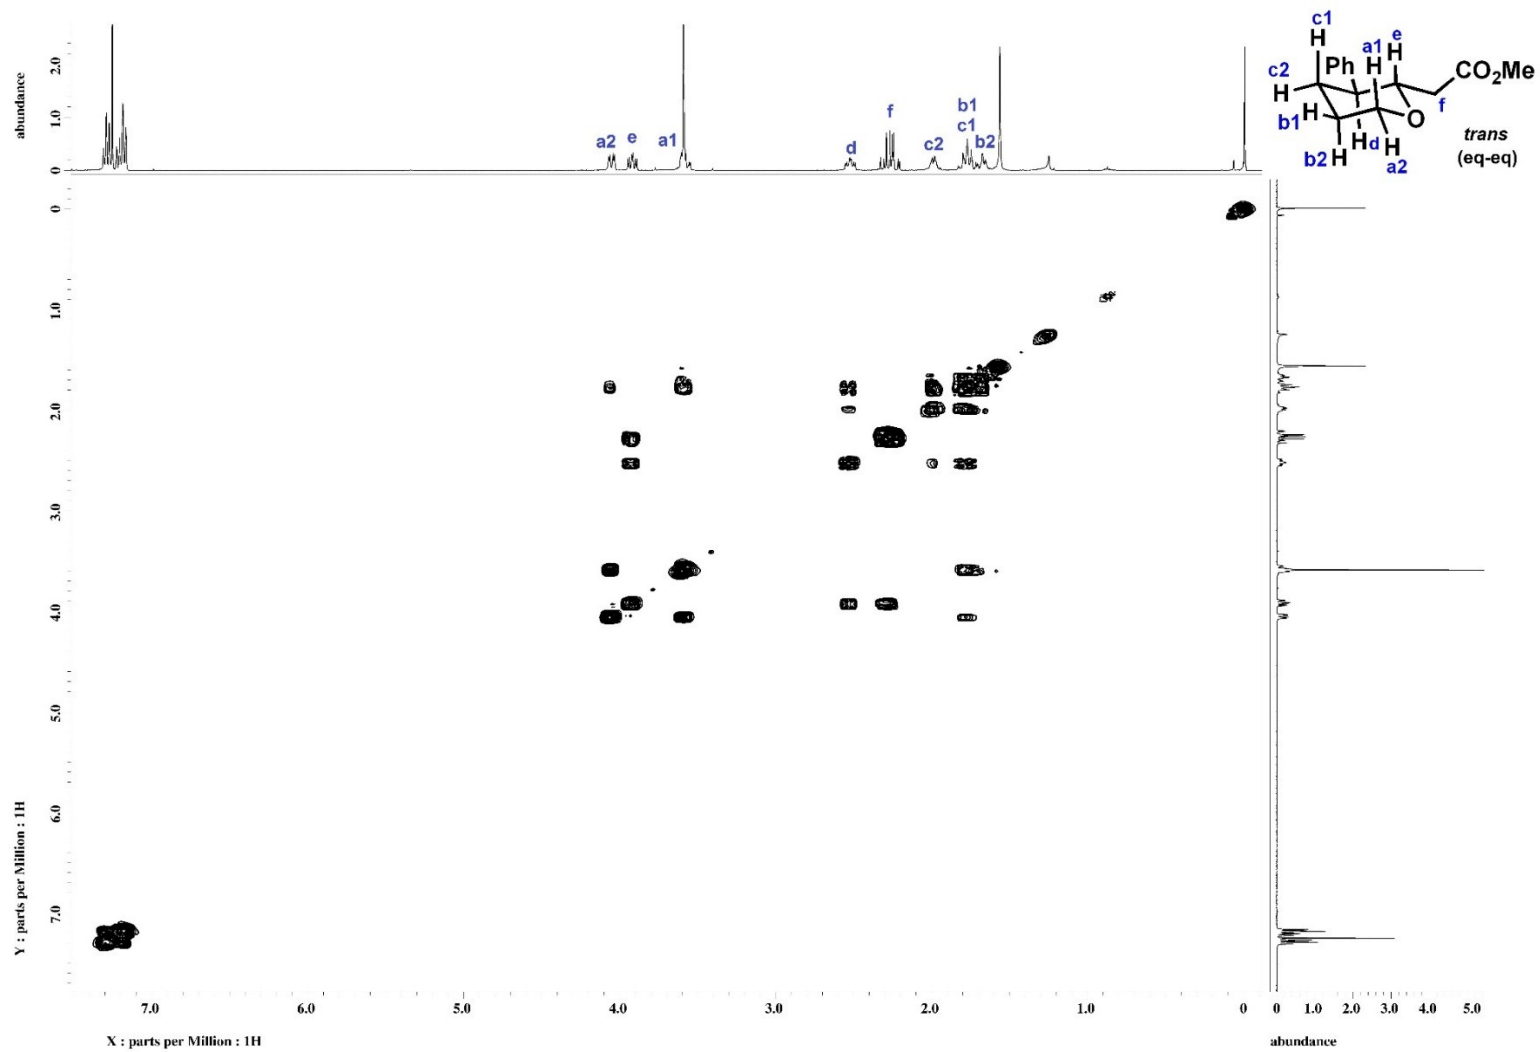

Figure 29 COSY spectrum of trans-25

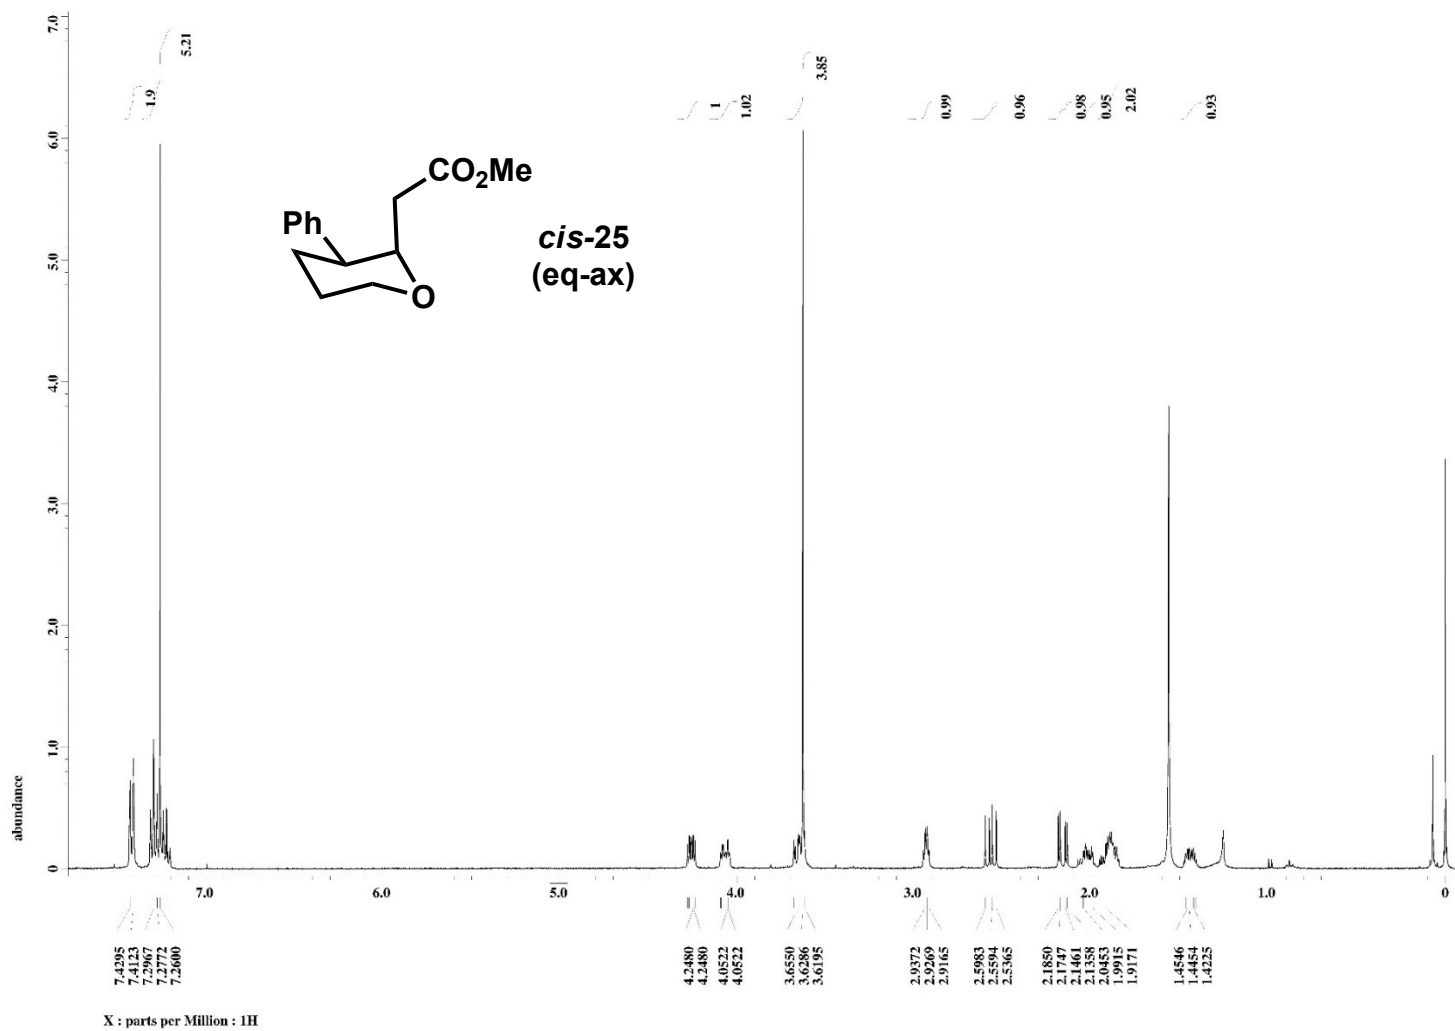

Figure 30  $^1\text{H}$  NMR spectrum of *cis*-25



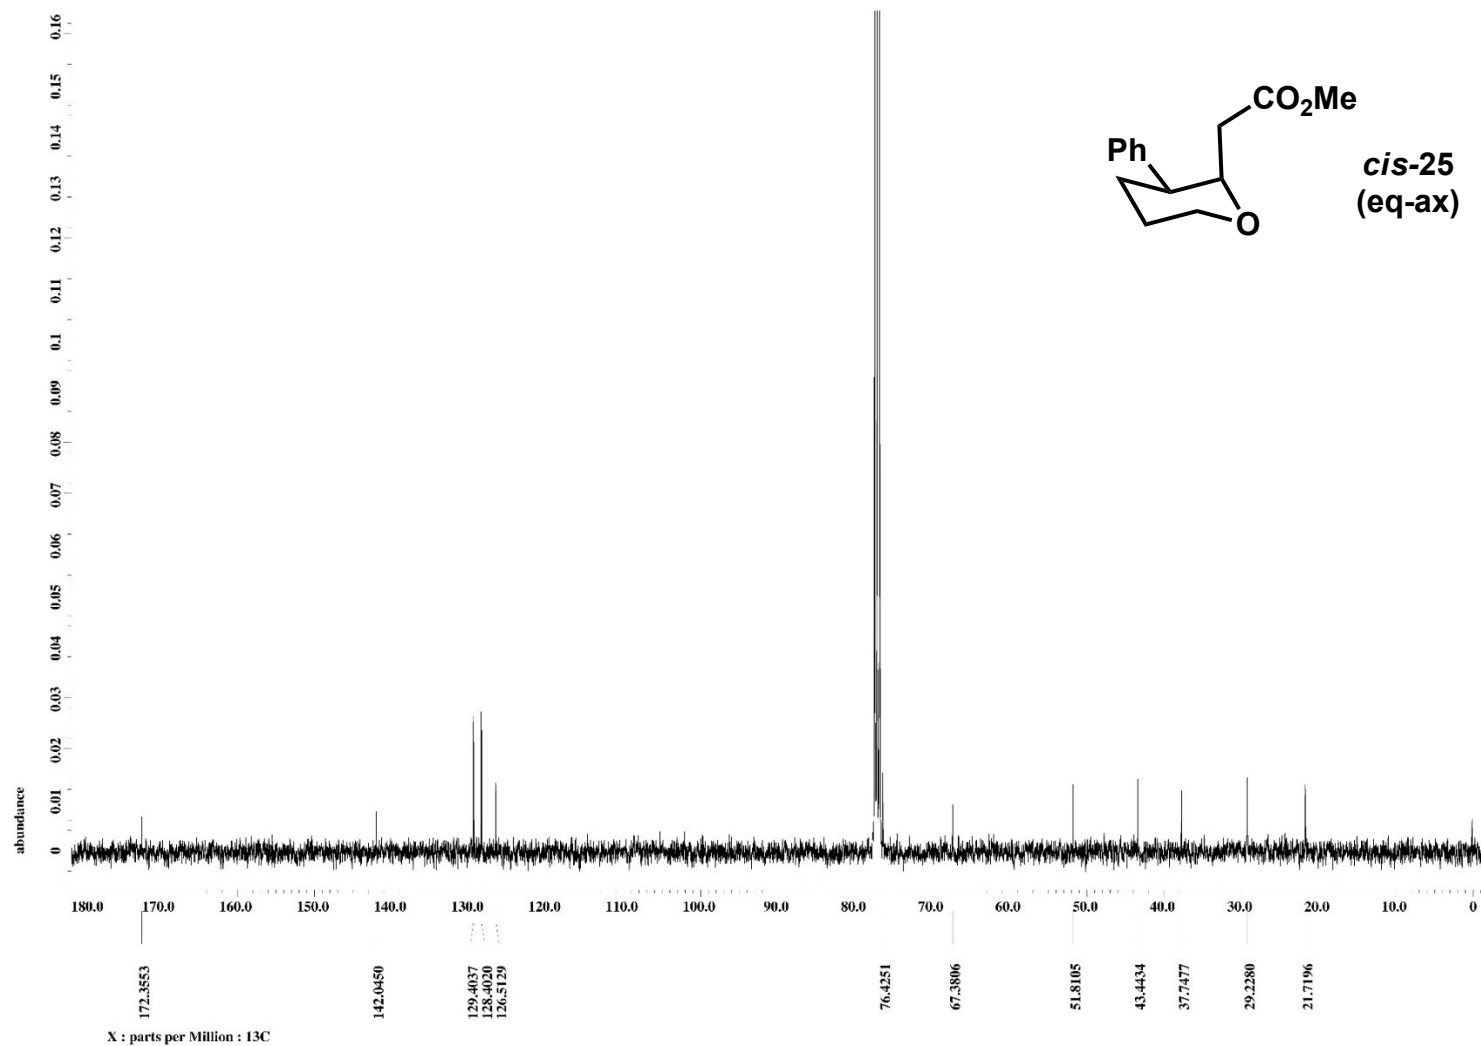

Figure 31  $^{13}\text{C}$  NMR spectrum of *cis*-25

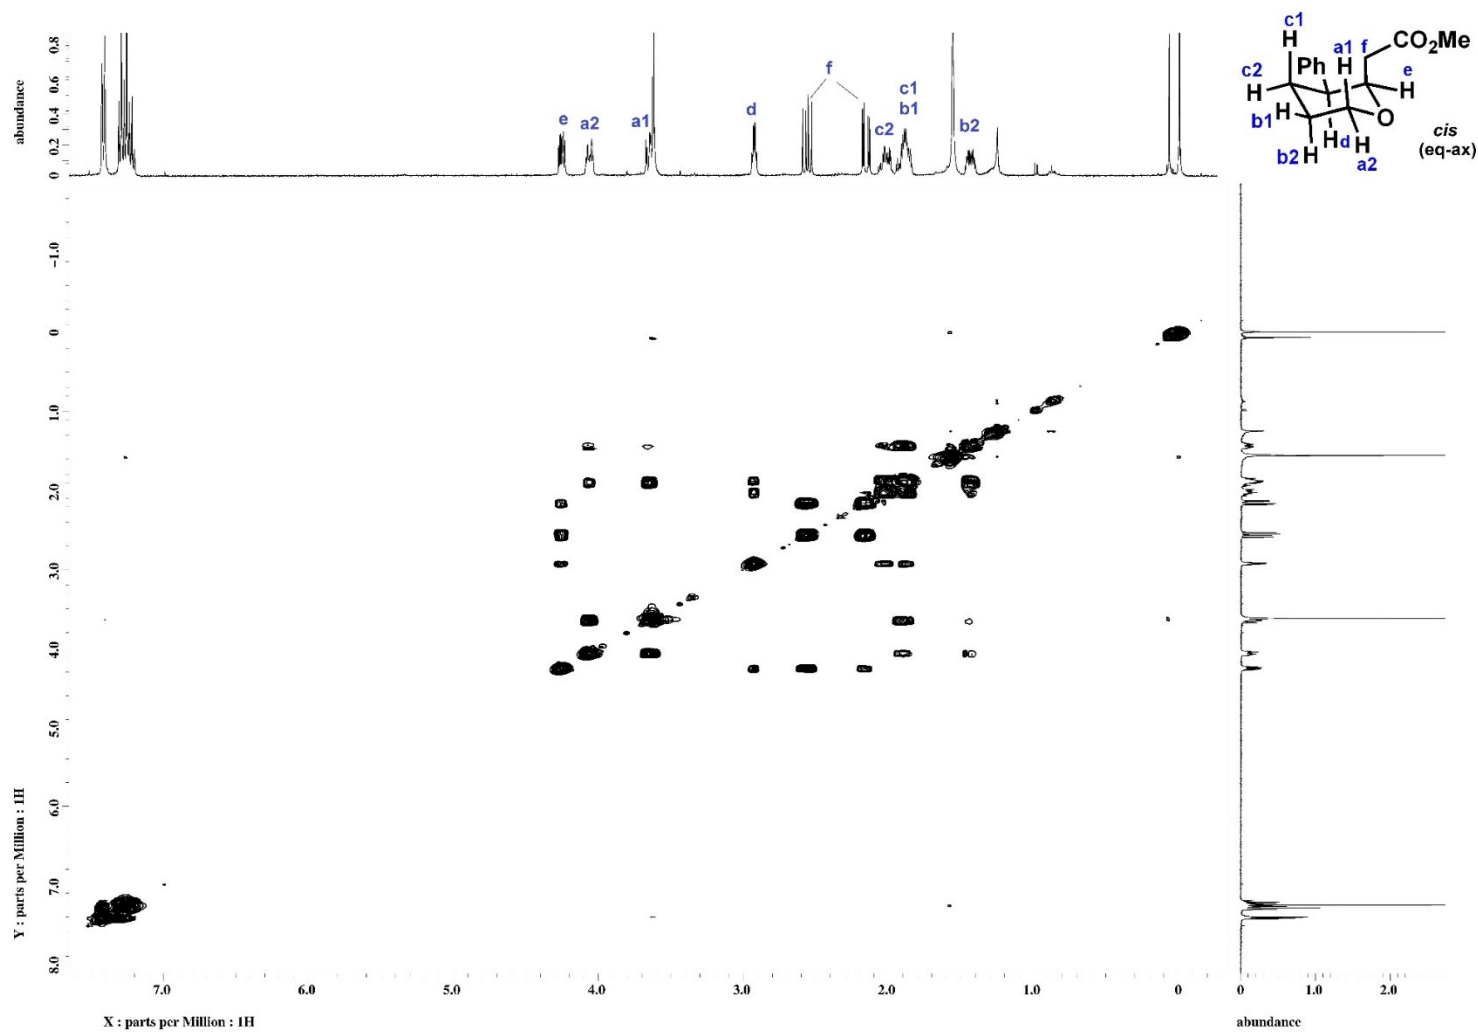

Figure 32 COSY spectrum of *cis*-25

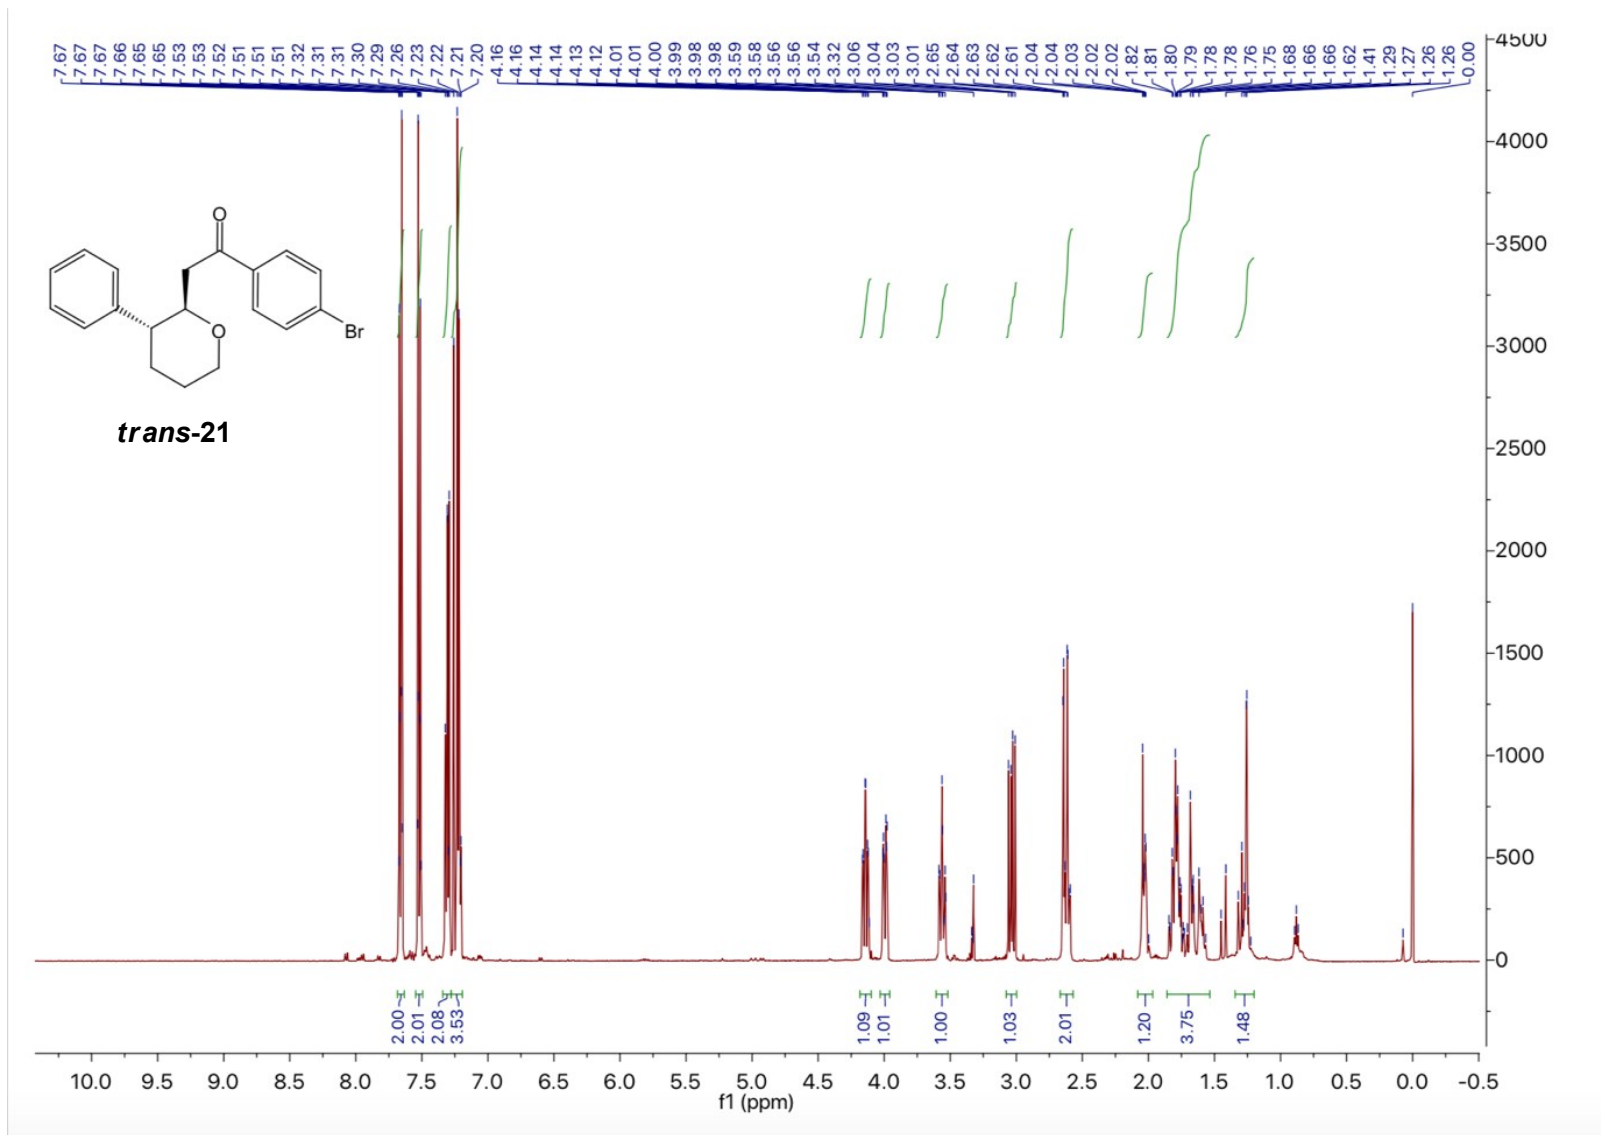

Figure 33 <sup>1</sup>H NMR spectrum of trans-21

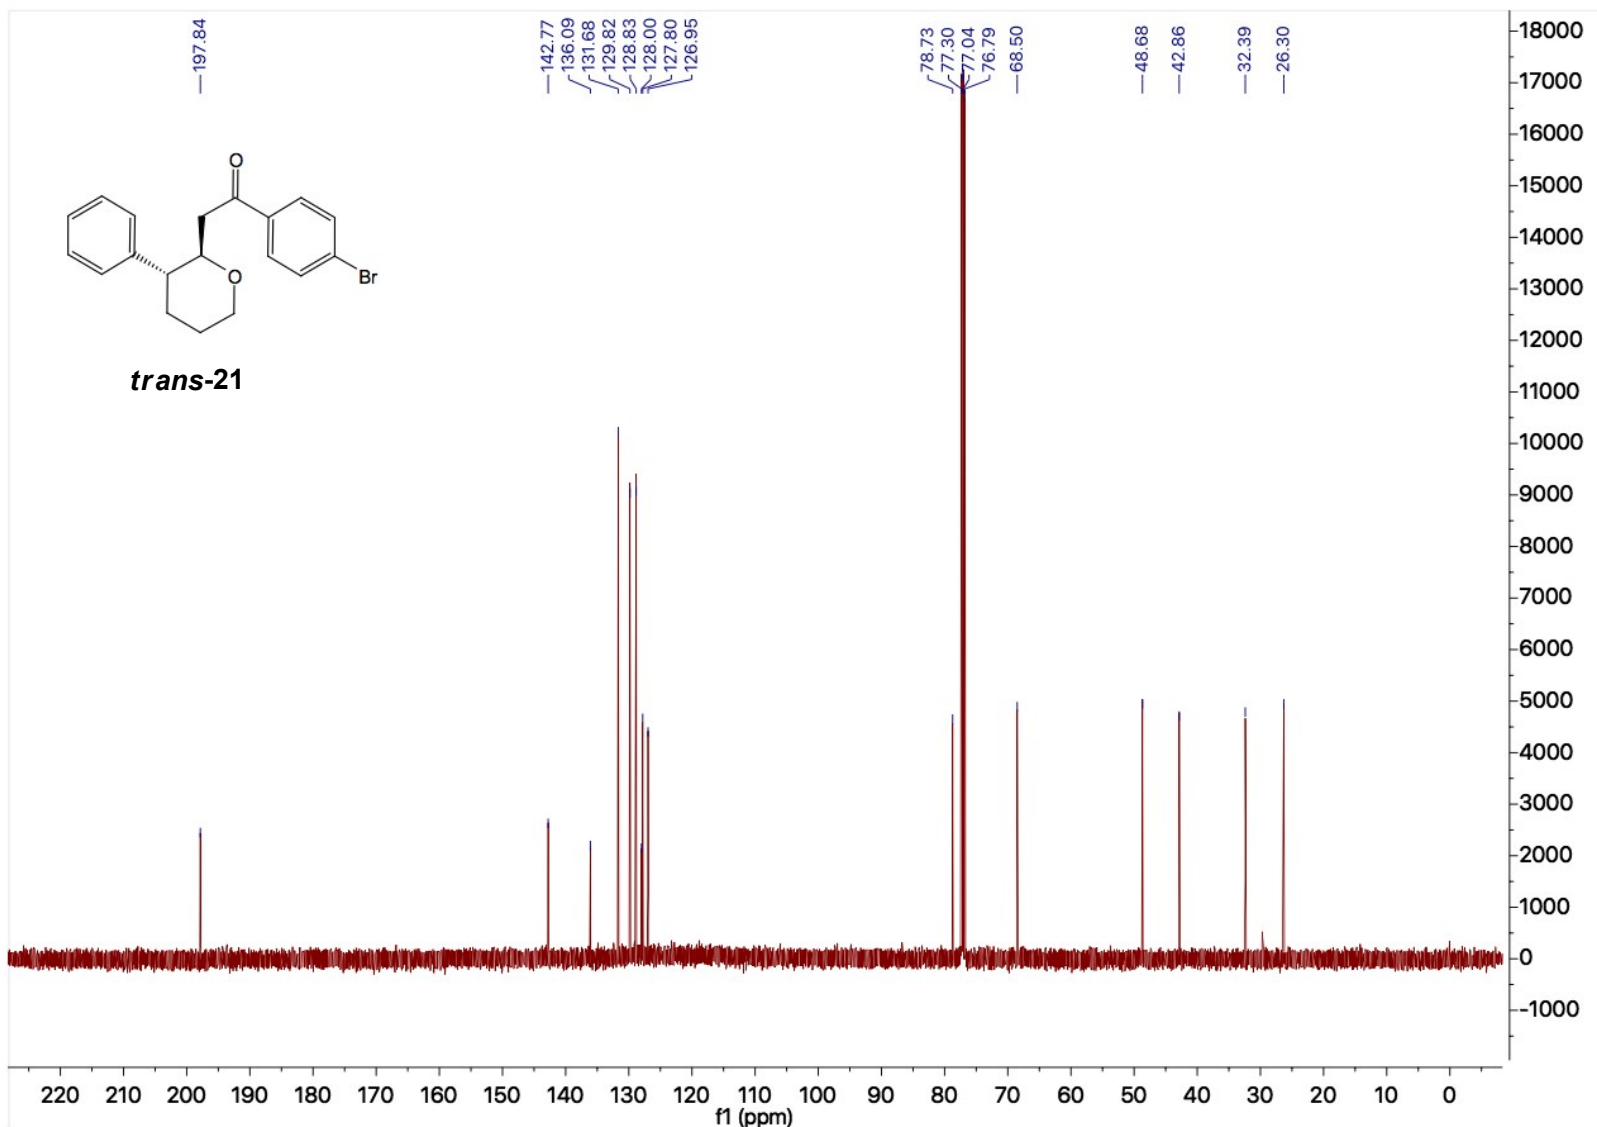

Figure 34  $^{13}\text{C}$  NMR spectrum of **trans-21**

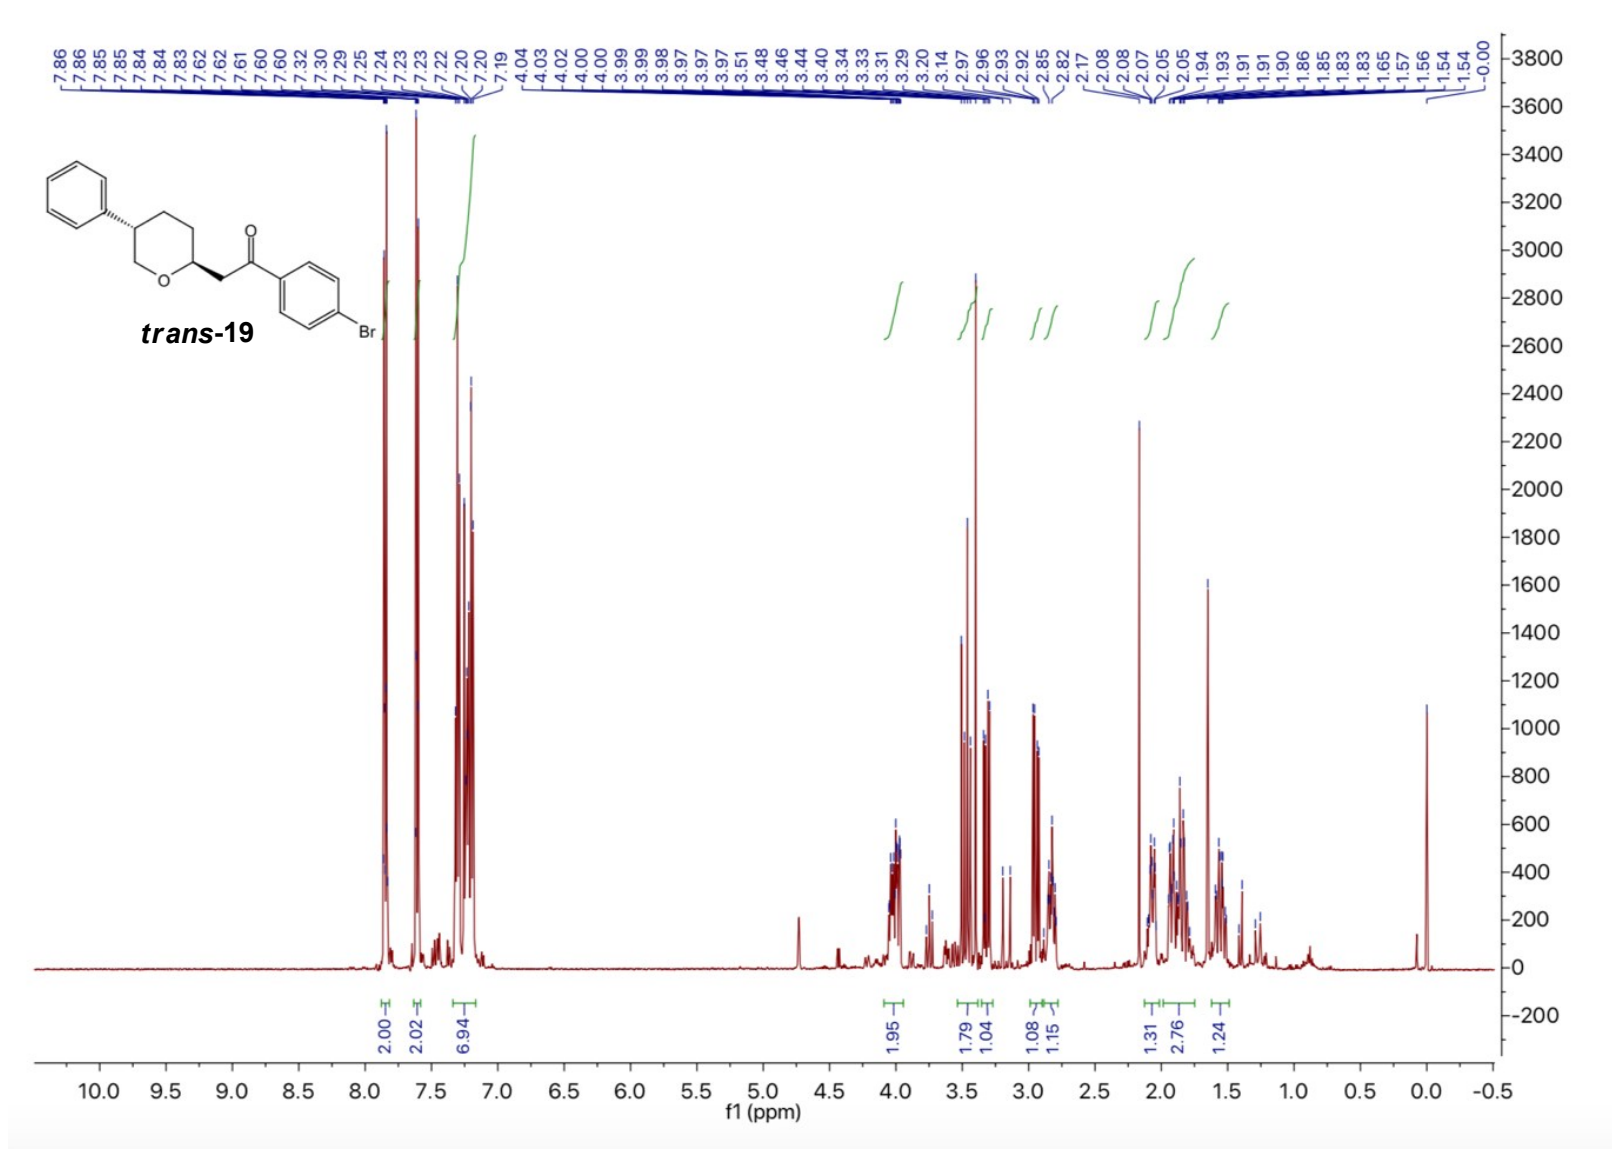

Figure 35  $^1\text{H}$  NMR spectrum of **trans-19**

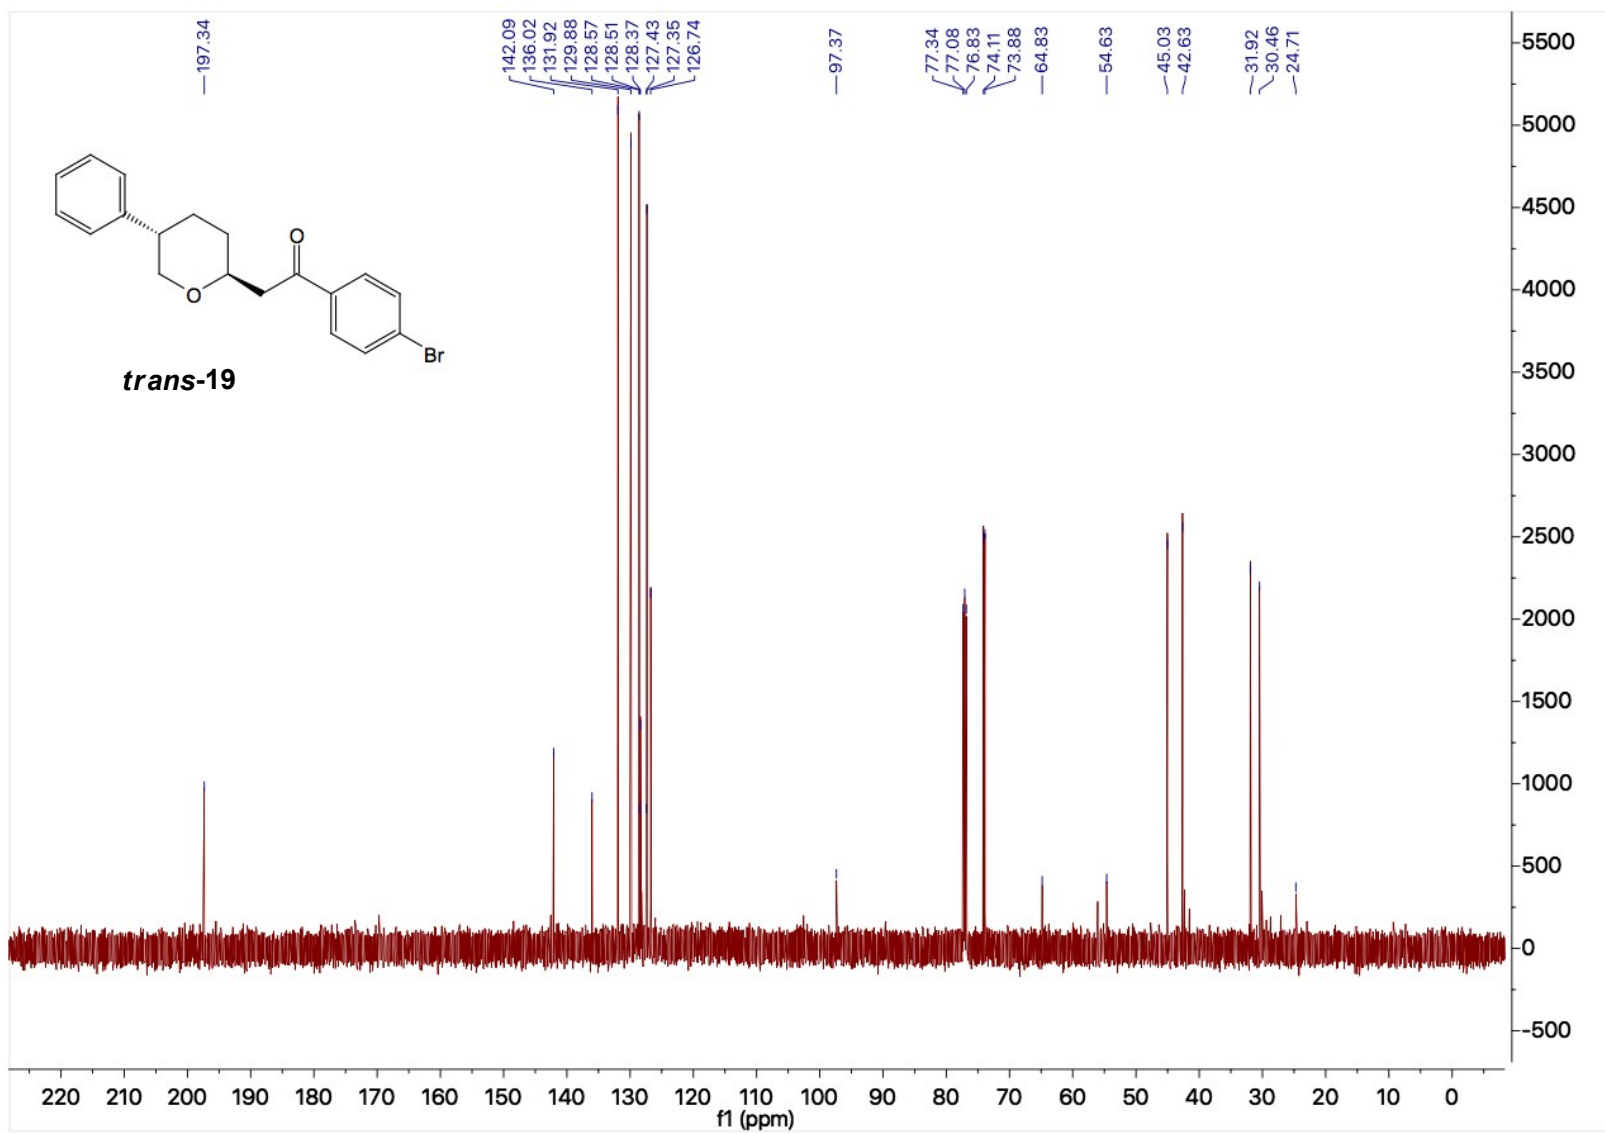

**Figure 36  $^{13}\text{C}$  NMR spectrum of trans-19**

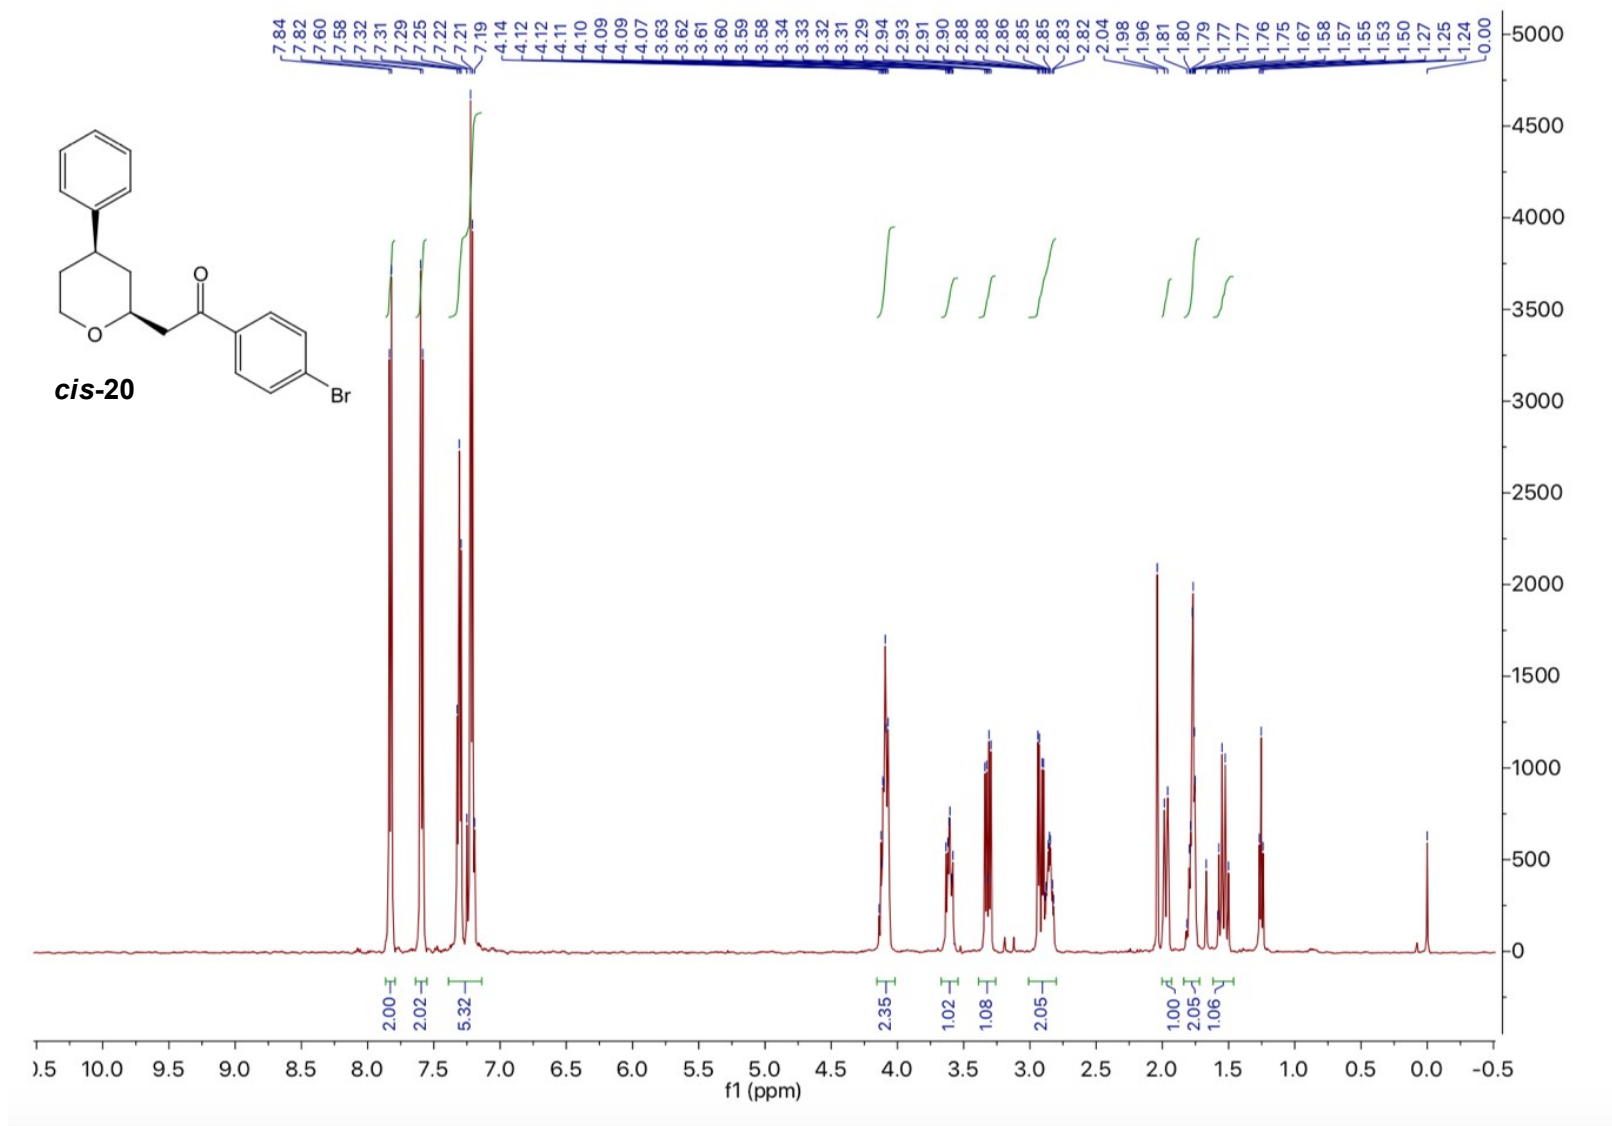

Figure 37 <sup>1</sup>H NMR spectrum of cis-20

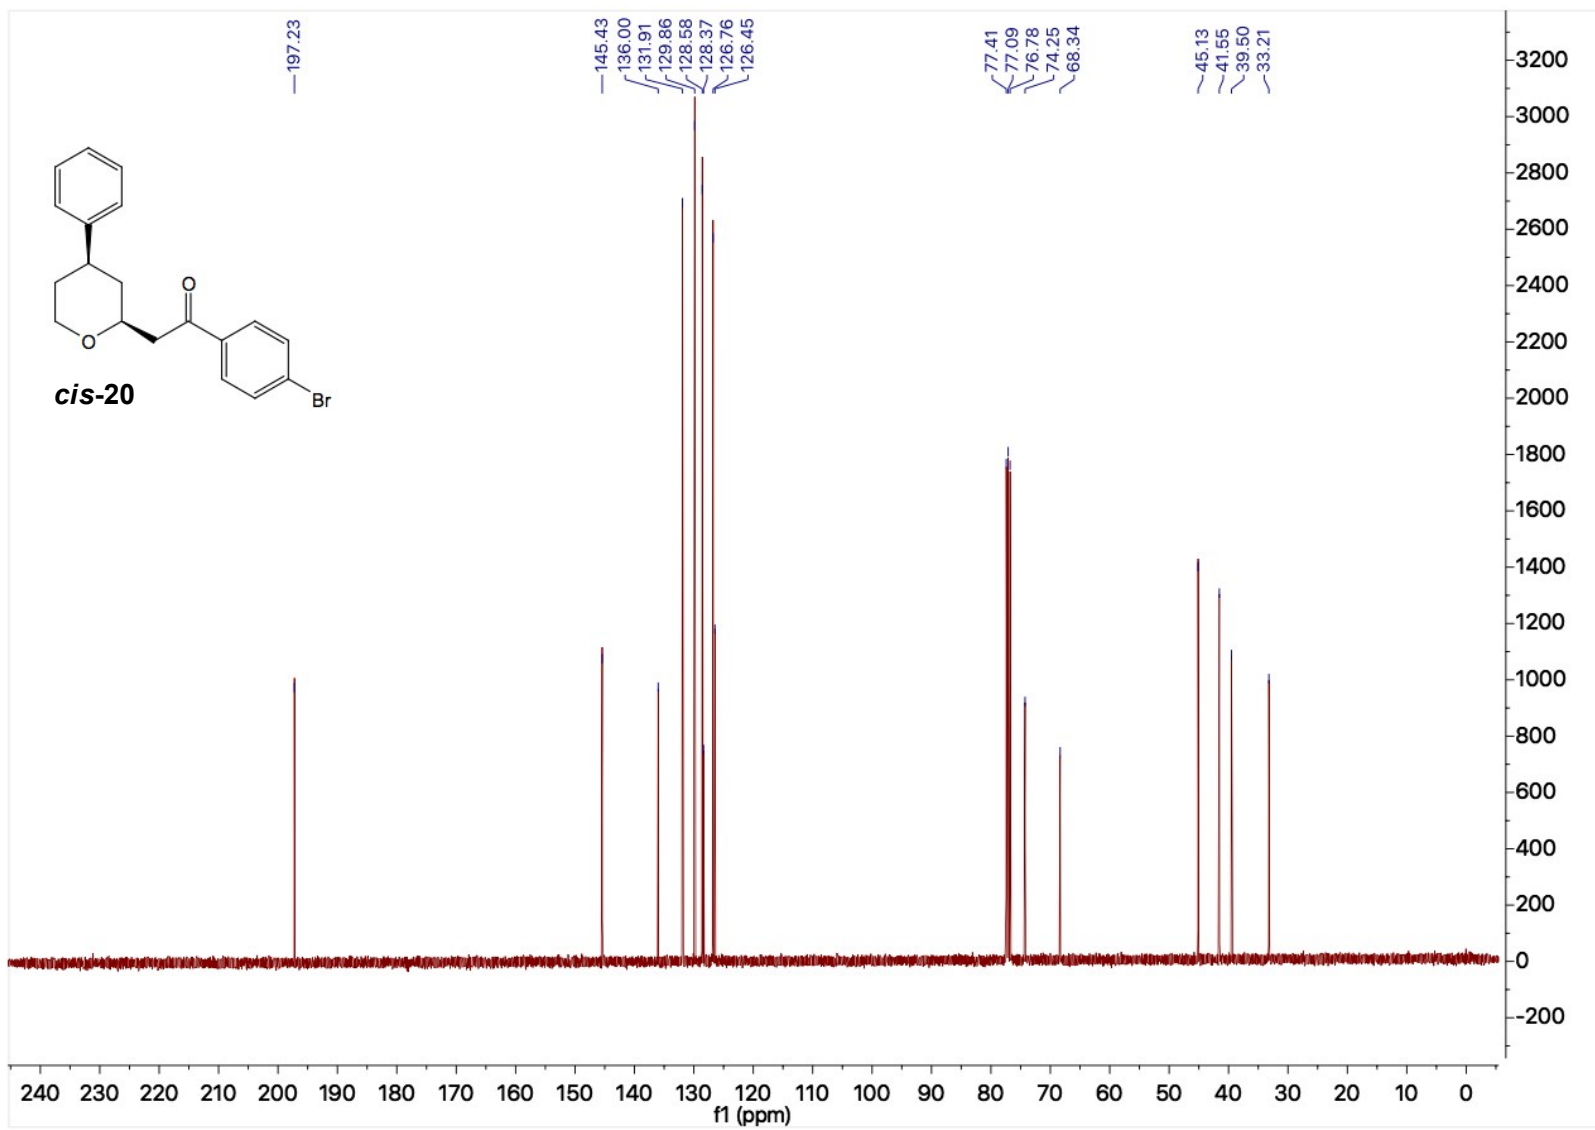

Figure 38 <sup>13</sup>C NMR spectrum of cis-20



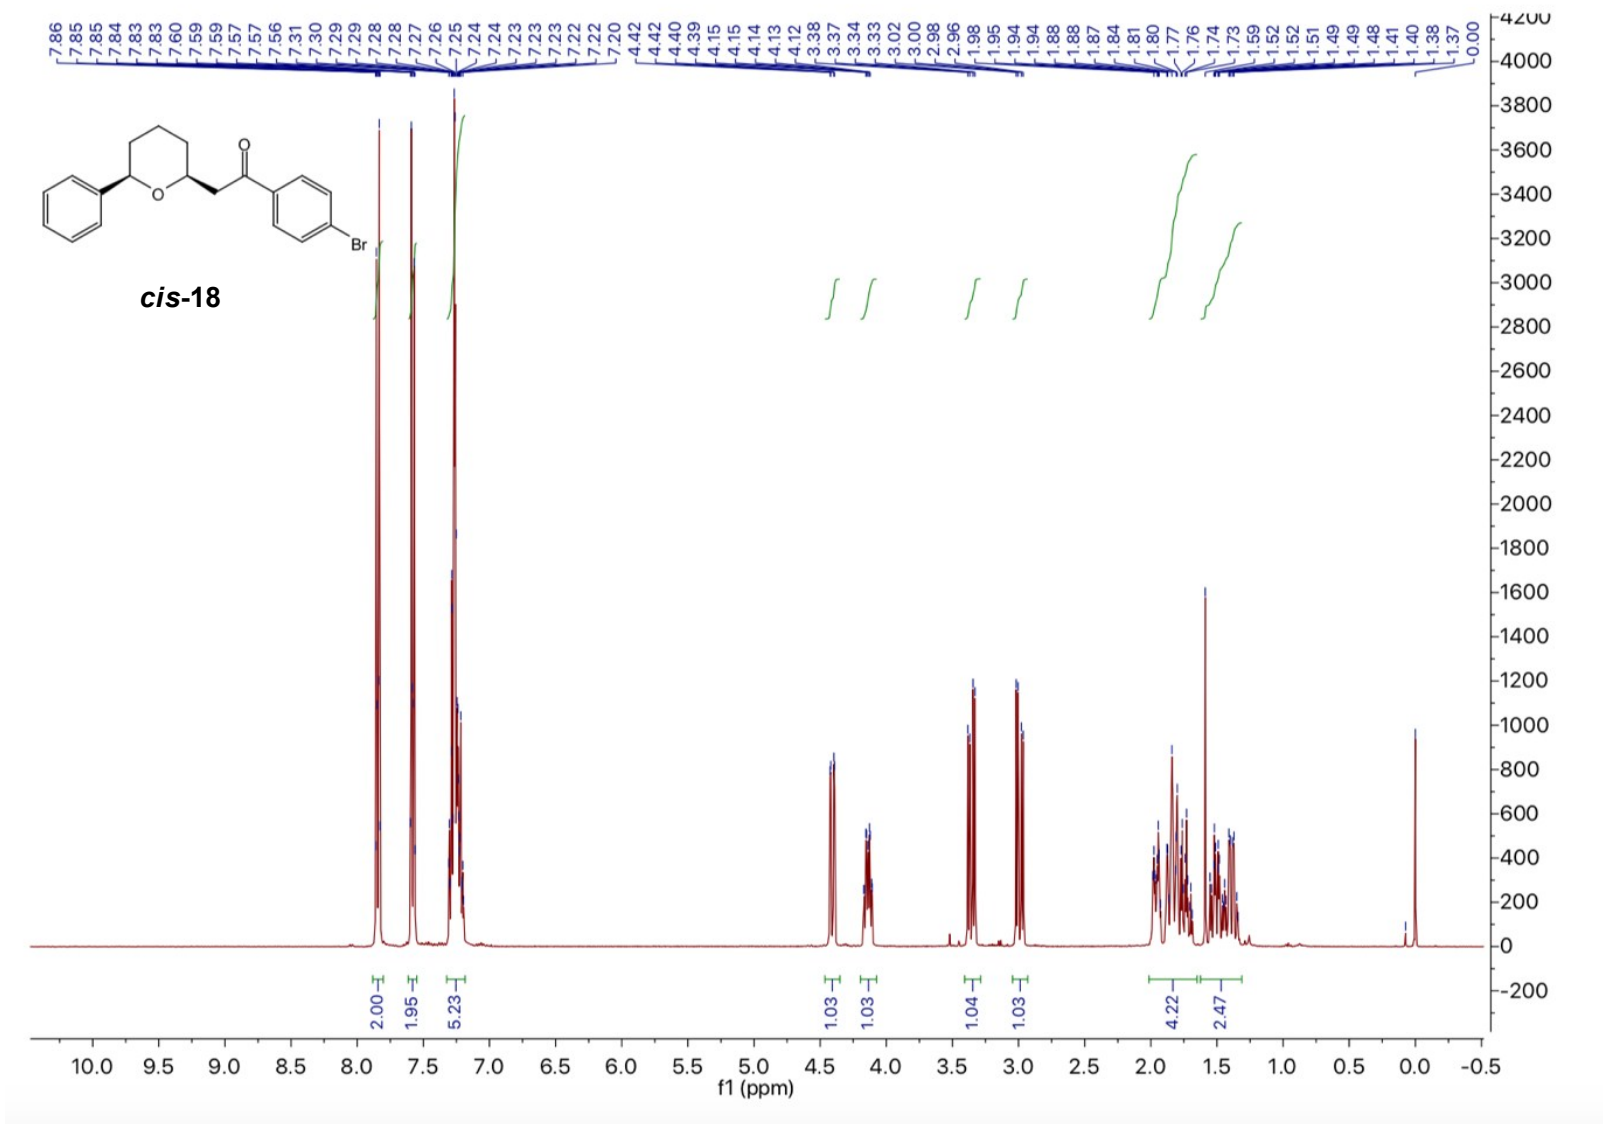

Figure 39 <sup>1</sup>H NMR spectrum of cis-18

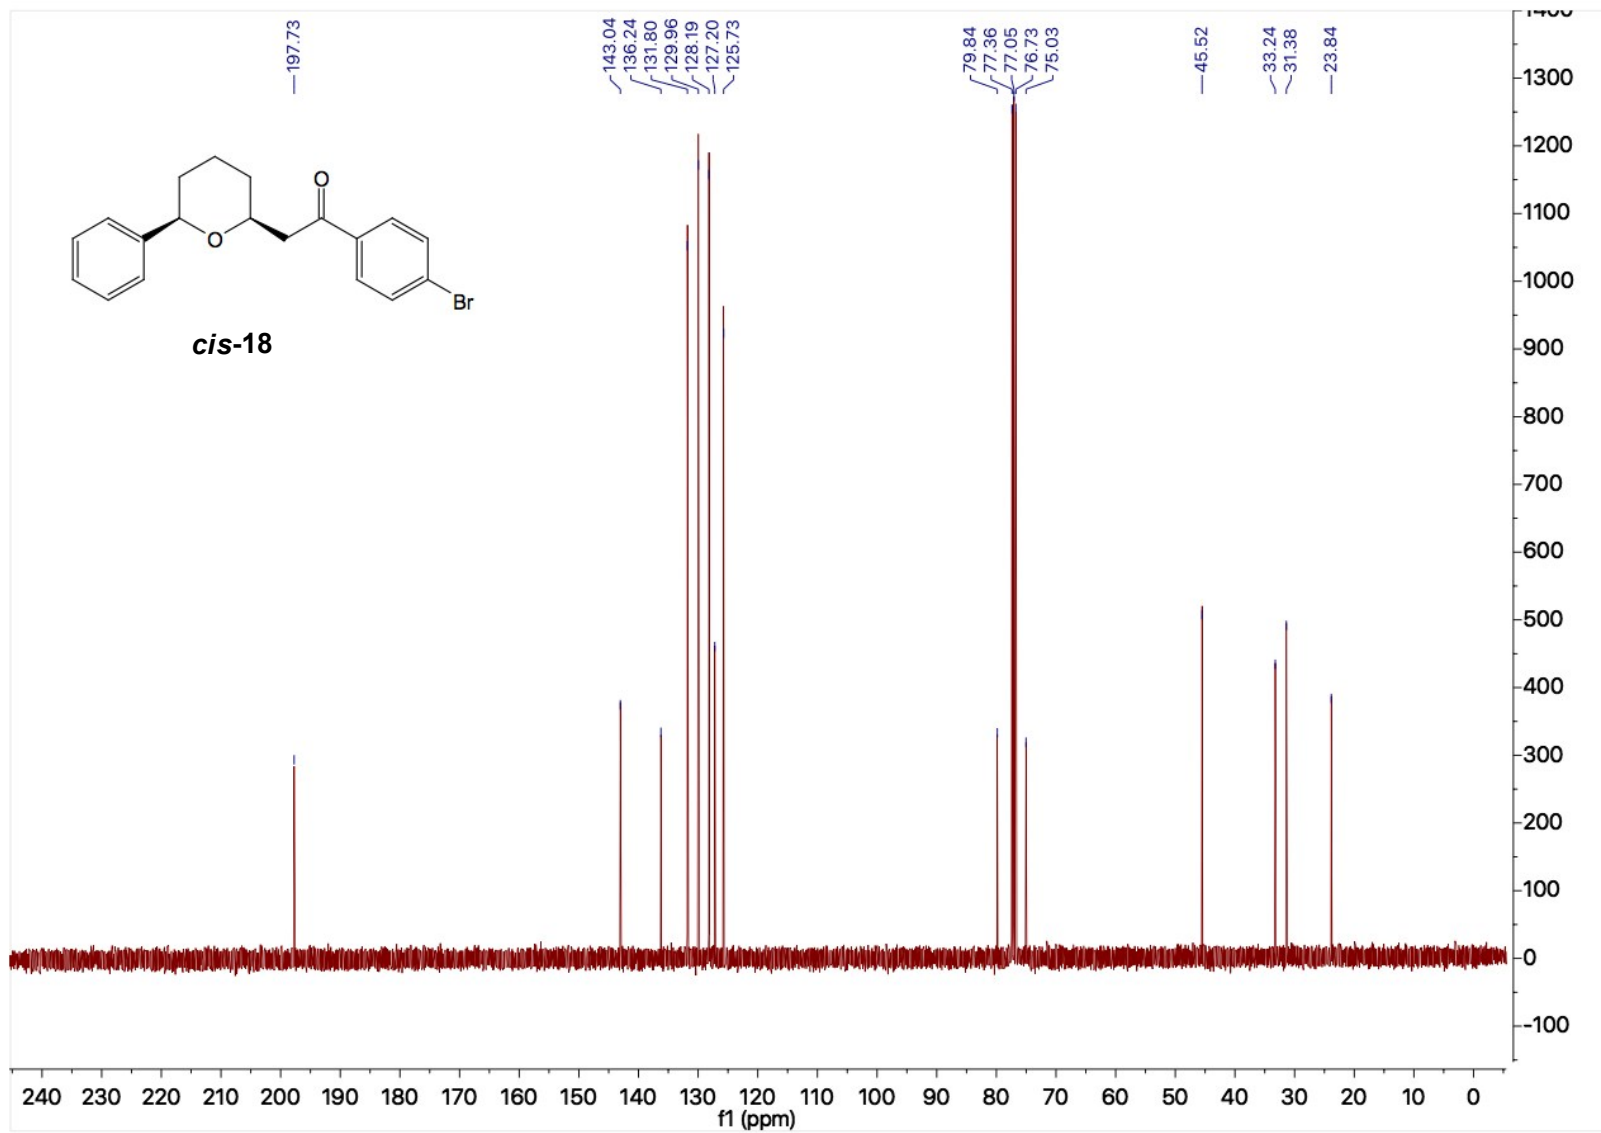

Figure 40 <sup>13</sup>C NMR spectrum of cis-18

## X-ray crystallographic data

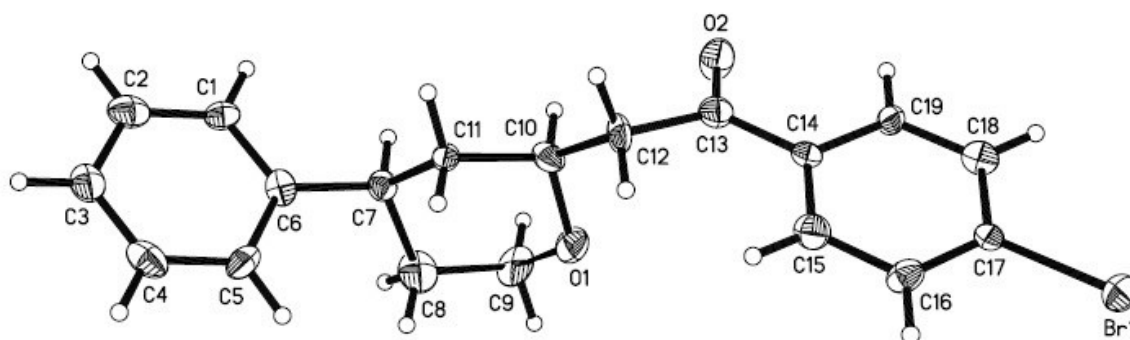

**Figure 41 ORTEP diagram of *cis*-20 with 50% probability**

**Table 1. Sample and crystal data for *cis*-20.**

|                               |                                                  |         |
|-------------------------------|--------------------------------------------------|---------|
| <b>Chemical formula</b>       | C <sub>19</sub> H <sub>19</sub> BrO <sub>2</sub> |         |
| <b>Formula weight</b>         | 359.25 g/mol                                     |         |
| <b>Temperature</b>            | 100(2) K                                         |         |
| <b>Wavelength</b>             | 0.71073 Å                                        |         |
| <b>Crystal size</b>           | 0.040 x 0.120 x 0.320 mm                         |         |
| <b>Crystal habit</b>          | colorless plate                                  |         |
| <b>Crystal system</b>         | orthorhombic                                     |         |
| <b>Space group</b>            | P n a 21                                         |         |
| <b>Unit cell dimensions</b>   | a = 19.185(2) Å                                  | α = 90° |
|                               | b = 5.7454(7) Å                                  | β = 90° |
|                               | c = 29.323(3) Å                                  | γ = 90° |
| <b>Volume</b>                 | 3232.1(7) Å <sup>3</sup>                         |         |
| <b>Z</b>                      | 8                                                |         |
| <b>Density (calculated)</b>   | 1.477 g/cm <sup>3</sup>                          |         |
| <b>Absorption coefficient</b> | 2.548 mm <sup>-1</sup>                           |         |
| <b>F(000)</b>                 | 1472                                             |         |

**Table 2. Data collection and structure refinement for *cis*-20.**

|                                            |                                                                              |
|--------------------------------------------|------------------------------------------------------------------------------|
| <b>Theta range for data collection</b>     | 2.23 to 27.94°                                                               |
| <b>Index ranges</b>                        | -25 ≤ h ≤ 24, -7 ≤ k ≤ 6, -38 ≤ l ≤ 38                                       |
| <b>Reflections collected</b>               | 18414                                                                        |
| <b>Independent reflections</b>             | 7547 [R(int) = 0.0670]                                                       |
| <b>Coverage of independent reflections</b> | 99.8%                                                                        |
| <b>Absorption correction</b>               | Multi-Scan                                                                   |
| <b>Max. and min. transmission</b>          | 0.9050 and 0.4960                                                            |
| <b>Structure solution technique</b>        | direct methods                                                               |
| <b>Structure solution program</b>          | SHELXT 2014/5 (Sheldrick, 2014)                                              |
| <b>Refinement method</b>                   | Full-matrix least-squares on F <sup>2</sup>                                  |
| <b>Refinement program</b>                  | SHELXL-2016/6 (Sheldrick, 2016)                                              |
| <b>Function minimized</b>                  | Σ w(F <sub>o</sub> <sup>2</sup> - F <sub>c</sub> <sup>2</sup> ) <sup>2</sup> |

|                                         |                                                                                                                                                               |
|-----------------------------------------|---------------------------------------------------------------------------------------------------------------------------------------------------------------|
| <b>Data / restraints / parameters</b>   | 7547 / 1 / 398                                                                                                                                                |
| <b>Goodness-of-fit on F<sup>2</sup></b> | 1.034                                                                                                                                                         |
| <b>Final R indices</b>                  | 5514 data; I>2σ(I) R1 = 0.0645, wR2 = 0.1480<br>all data R1 = 0.0960, wR2 = 0.1637                                                                            |
| <b>Weighting scheme</b>                 | w=1/[σ <sup>2</sup> (F <sub>o</sub> <sup>2</sup> )+(0.0817P) <sup>2</sup> +2.4536P]<br>where P=(F <sub>o</sub> <sup>2</sup> +2F <sub>c</sub> <sup>2</sup> )/3 |
| <b>Absolute structure parameter</b>     | 0.39(2)                                                                                                                                                       |
| <b>Largest diff. peak and hole</b>      | 2.354 and -0.874 eÅ <sup>-3</sup>                                                                                                                             |
| <b>R.M.S. deviation from mean</b>       | 0.125 eÅ <sup>-3</sup>                                                                                                                                        |

**Table 3. Bond lengths (Å) for *cis*-20.**

|          |           |          |           |
|----------|-----------|----------|-----------|
| Br1-C17  | 1.889(9)  | Br2-C36  | 1.903(9)  |
| C1-C2    | 1.368(15) | C1-C6    | 1.388(14) |
| C1-H1    | 0.95      | C2-C3    | 1.384(16) |
| C2-H2    | 0.95      | C3-C4    | 1.390(16) |
| C3-H3    | 0.95      | C4-C5    | 1.367(15) |
| C4-H4    | 0.95      | C5-C6    | 1.401(14) |
| C5-H5    | 0.95      | C6-C7    | 1.529(13) |
| C7-C8    | 1.509(14) | C7-C11   | 1.534(13) |
| C7-H7    | 1.0       | C8-C9    | 1.496(16) |
| C8-H8A   | 0.99      | C8-H8B   | 0.99      |
| C9-O1    | 1.422(13) | C9-H9A   | 0.99      |
| C9-H9B   | 0.99      | C10-O1   | 1.423(11) |
| C10-C12  | 1.520(13) | C10-C11  | 1.541(13) |
| C10-H10  | 1.0       | C11-H11A | 0.99      |
| C11-H11B | 0.99      | C12-C13  | 1.538(13) |
| C12-H12A | 0.99      | C12-H12B | 0.99      |
| C13-O2   | 1.218(12) | C13-C14  | 1.482(14) |
| C14-C15  | 1.394(13) | C14-C19  | 1.395(12) |
| C15-C16  | 1.402(14) | C15-H15  | 0.95      |
| C16-C17  | 1.370(14) | C16-H16  | 0.95      |
| C17-C18  | 1.405(14) | C18-C19  | 1.370(13) |
| C18-H18  | 0.95      | C19-H19  | 0.95      |
| C20-C21  | 1.383(15) | C20-C25  | 1.393(14) |
| C20-H20  | 0.95      | C21-C22  | 1.382(17) |
| C21-H21  | 0.95      | C22-C23  | 1.353(16) |
| C22-H22  | 0.95      | C23-C24  | 1.396(15) |
| C23-H23  | 0.95      | C24-C25  | 1.418(14) |
| C24-H24  | 0.95      | C25-C26  | 1.512(14) |
| C26-C30  | 1.518(14) | C26-C27  | 1.528(15) |
| C26-H26  | 1.0       | C27-C28  | 1.501(15) |
| C27-H27A | 0.99      | C27-H27B | 0.99      |
| C28-O3   | 1.450(13) | C28-H28A | 0.99      |
| C28-H28B | 0.99      | C29-O3   | 1.425(11) |
| C29-C30  | 1.509(13) | C29-C31  | 1.523(13) |
| C29-H29  | 1.0       | C30-H30A | 0.99      |
| C30-H30B | 0.99      | C31-C32  | 1.495(13) |
| C31-H31A | 0.99      | C31-H31B | 0.99      |
| C32-O4   | 1.217(12) | C32-C33  | 1.510(13) |

|         |           |         |           |
|---------|-----------|---------|-----------|
| C33-C34 | 1.378(13) | C33-C38 | 1.393(13) |
| C34-C35 | 1.383(13) | C34-H34 | 0.95      |
| C35-C36 | 1.396(13) | C35-H35 | 0.95      |
| C36-C37 | 1.378(13) | C37-C38 | 1.376(13) |
| C37-H37 | 0.95      | C38-H38 | 0.95      |

**Table 4. Bond angles (°) for *cis*-20.**

|              |           |               |           |
|--------------|-----------|---------------|-----------|
| C2-C1-C6     | 122.0(9)  | C2-C1-H1      | 119.0     |
| C6-C1-H1     | 119.0     | C1-C2-C3      | 119.9(10) |
| C1-C2-H2     | 120.1     | C3-C2-H2      | 120.1     |
| C2-C3-C4     | 118.4(10) | C2-C3-H3      | 120.8     |
| C4-C3-H3     | 120.8     | C5-C4-C3      | 122.2(11) |
| C5-C4-H4     | 118.9     | C3-C4-H4      | 118.9     |
| C4-C5-C6     | 119.2(10) | C4-C5-H5      | 120.4     |
| C6-C5-H5     | 120.4     | C1-C6-C5      | 118.3(9)  |
| C1-C6-C7     | 120.3(9)  | C5-C6-C7      | 121.3(9)  |
| C8-C7-C6     | 115.9(9)  | C8-C7-C11     | 109.2(8)  |
| C6-C7-C11    | 109.1(8)  | C8-C7-H7      | 107.4     |
| C6-C7-H7     | 107.4     | C11-C7-H7     | 107.4     |
| C9-C8-C7     | 112.1(9)  | C9-C8-H8A     | 109.2     |
| C7-C8-H8A    | 109.2     | C9-C8-H8B     | 109.2     |
| C7-C8-H8B    | 109.2     | H8A-C8-H8B    | 107.9     |
| O1-C9-C8     | 112.6(9)  | O1-C9-H9A     | 109.1     |
| C8-C9-H9A    | 109.1     | O1-C9-H9B     | 109.1     |
| C8-C9-H9B    | 109.1     | H9A-C9-H9B    | 107.8     |
| O1-C10-C12   | 107.6(8)  | O1-C10-C11    | 110.5(8)  |
| C12-C10-C11  | 111.5(8)  | O1-C10-H10    | 109.1     |
| C12-C10-H10  | 109.1     | C11-C10-H10   | 109.1     |
| C7-C11-C10   | 110.6(8)  | C7-C11-H11A   | 109.5     |
| C10-C11-H11A | 109.5     | C7-C11-H11B   | 109.5     |
| C10-C11-H11B | 109.5     | H11A-C11-H11B | 108.1     |
| C10-C12-C13  | 110.1(8)  | C10-C12-H12A  | 109.6     |
| C13-C12-H12A | 109.6     | C10-C12-H12B  | 109.6     |
| C13-C12-H12B | 109.6     | H12A-C12-H12B | 108.1     |
| O2-C13-C14   | 120.6(9)  | O2-C13-C12    | 118.8(9)  |
| C14-C13-C12  | 120.5(9)  | C15-C14-C19   | 118.9(9)  |
| C15-C14-C13  | 123.4(9)  | C19-C14-C13   | 117.6(8)  |
| C14-C15-C16  | 120.3(9)  | C14-C15-H15   | 119.8     |
| C16-C15-H15  | 119.8     | C17-C16-C15   | 119.4(9)  |
| C17-C16-H16  | 120.3     | C15-C16-H16   | 120.3     |
| C16-C17-C18  | 120.8(9)  | C16-C17-Br1   | 120.5(7)  |
| C18-C17-Br1  | 118.8(7)  | C19-C18-C17   | 119.3(9)  |
| C19-C18-H18  | 120.4     | C17-C18-H18   | 120.4     |
| C18-C19-C14  | 121.2(9)  | C18-C19-H19   | 119.4     |
| C14-C19-H19  | 119.4     | C21-C20-C25   | 121.4(10) |
| C21-C20-H20  | 119.3     | C25-C20-H20   | 119.3     |
| C22-C21-C20  | 119.9(10) | C22-C21-H21   | 120.0     |
| C20-C21-H21  | 120.0     | C23-C22-C21   | 120.5(10) |

|               |           |              |           |
|---------------|-----------|--------------|-----------|
| C23-C22-H22   | 119.7     | C21-C22-H22  | 119.7     |
| C22-C23-C24   | 120.5(11) | C22-C23-H23  | 119.7     |
| C24-C23-H23   | 119.7     | C23-C24-C25  | 120.2(10) |
| C23-C24-H24   | 119.9     | C25-C24-H24  | 119.9     |
| C20-C25-C24   | 117.3(10) | C20-C25-C26  | 121.0(9)  |
| C24-C25-C26   | 121.7(9)  | C25-C26-C30  | 111.0(9)  |
| C25-C26-C27   | 114.8(9)  | C30-C26-C27  | 108.6(8)  |
| C25-C26-H26   | 107.4     | C30-C26-H26  | 107.4     |
| C27-C26-H26   | 107.4     | C28-C27-C26  | 111.7(9)  |
| C28-C27-H27A  | 109.3     | C26-C27-H27A | 109.3     |
| C28-C27-H27B  | 109.3     | C26-C27-H27B | 109.3     |
| H27A-C27-H27B | 107.9     | O3-C28-C27   | 110.7(10) |
| O3-C28-H28A   | 109.5     | C27-C28-H28A | 109.5     |
| O3-C28-H28B   | 109.5     | C27-C28-H28B | 109.5     |
| H28A-C28-H28B | 108.1     | O3-C29-C30   | 110.9(8)  |
| O3-C29-C31    | 106.7(8)  | C30-C29-C31  | 114.0(8)  |
| O3-C29-H29    | 108.4     | C30-C29-H29  | 108.4     |
| C31-C29-H29   | 108.4     | C29-C30-C26  | 111.7(8)  |
| C29-C30-H30A  | 109.3     | C26-C30-H30A | 109.3     |
| C29-C30-H30B  | 109.3     | C26-C30-H30B | 109.3     |
| H30A-C30-H30B | 107.9     | C32-C31-C29  | 112.2(8)  |
| C32-C31-H31A  | 109.2     | C29-C31-H31A | 109.2     |
| C32-C31-H31B  | 109.2     | C29-C31-H31B | 109.2     |
| H31A-C31-H31B | 107.9     | O4-C32-C31   | 119.9(9)  |
| O4-C32-C33    | 119.5(8)  | C31-C32-C33  | 120.6(8)  |
| C34-C33-C38   | 118.1(9)  | C34-C33-C32  | 124.2(9)  |
| C38-C33-C32   | 117.7(8)  | C33-C34-C35  | 121.5(9)  |
| C33-C34-H34   | 119.2     | C35-C34-H34  | 119.2     |
| C34-C35-C36   | 117.8(9)  | C34-C35-H35  | 121.1     |
| C36-C35-H35   | 121.1     | C37-C36-C35  | 122.8(9)  |
| C37-C36-Br2   | 118.1(7)  | C35-C36-Br2  | 119.1(7)  |
| C38-C37-C36   | 116.9(9)  | C38-C37-H37  | 121.5     |
| C36-C37-H37   | 121.5     | C37-C38-C33  | 122.8(9)  |
| C37-C38-H38   | 118.6     | C33-C38-H38  | 118.6     |
| C9-O1-C10     | 111.2(8)  | C29-O3-C28   | 110.0(8)  |

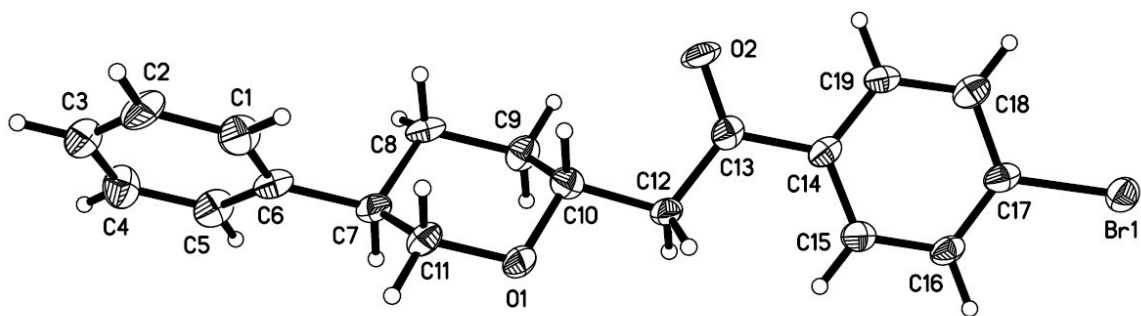

Figure 42 ORTEP diagram of *trans*-19 with 50% probability

**Table 5. Sample and crystal data for *trans*-19.**

|                               |                                                  |                |
|-------------------------------|--------------------------------------------------|----------------|
| <b>Chemical formula</b>       | C <sub>19</sub> H <sub>19</sub> BrO <sub>2</sub> |                |
| <b>Formula weight</b>         | 359.25 g/mol                                     |                |
| <b>Temperature</b>            | 100(2) K                                         |                |
| <b>Wavelength</b>             | 0.71073 Å                                        |                |
| <b>Crystal size</b>           | 0.040 x 0.220 x 0.240 mm                         |                |
| <b>Crystal habit</b>          | colorless plate                                  |                |
| <b>Crystal system</b>         | monoclinic                                       |                |
| <b>Space group</b>            | P 1 21 1                                         |                |
| <b>Unit cell dimensions</b>   | a = 9.6819(10) Å                                 | α = 90°        |
|                               | b = 9.8937(10) Å                                 | β = 97.704(3)° |
|                               | c = 25.250(3) Å                                  | γ = 90°        |
| <b>Volume</b>                 | 2396.9(4) Å <sup>3</sup>                         |                |
| <b>Z</b>                      | 6                                                |                |
| <b>Density (calculated)</b>   | 1.493 g/cm <sup>3</sup>                          |                |
| <b>Absorption coefficient</b> | 2.577 mm <sup>-1</sup>                           |                |
| <b>F(000)</b>                 | 1104                                             |                |

**Table 6. Data collection and structure refinement for *trans*-19.**

|                                            |                                                                                                                                                              |                           |
|--------------------------------------------|--------------------------------------------------------------------------------------------------------------------------------------------------------------|---------------------------|
| <b>Theta range for data collection</b>     | 2.37 to 27.14°                                                                                                                                               |                           |
| <b>Index ranges</b>                        | -12 ≤ h ≤ 12, -12 ≤ k ≤ 12, -32 ≤ l ≤ 31                                                                                                                     |                           |
| <b>Reflections collected</b>               | 32466                                                                                                                                                        |                           |
| <b>Independent reflections</b>             | 10573 [R(int) = 0.1292]                                                                                                                                      |                           |
| <b>Coverage of independent reflections</b> | 99.7%                                                                                                                                                        |                           |
| <b>Absorption correction</b>               | Multi-Scan                                                                                                                                                   |                           |
| <b>Max. and min. transmission</b>          | 0.9040 and 0.5770                                                                                                                                            |                           |
| <b>Structure solution technique</b>        | direct methods                                                                                                                                               |                           |
| <b>Structure solution program</b>          | XT, VERSION 2014/5                                                                                                                                           |                           |
| <b>Refinement method</b>                   | Full-matrix least-squares on F <sup>2</sup>                                                                                                                  |                           |
| <b>Refinement program</b>                  | SHELXL-2014/7 (Sheldrick, 2014)                                                                                                                              |                           |
| <b>Function minimized</b>                  | Σ w(F <sub>o</sub> <sup>2</sup> - F <sub>c</sub> <sup>2</sup> ) <sup>2</sup>                                                                                 |                           |
| <b>Data / restraints / parameters</b>      | 10573 / 1 / 595                                                                                                                                              |                           |
| <b>Goodness-of-fit on F<sup>2</sup></b>    | 1.021                                                                                                                                                        |                           |
| <b>Δ/σ<sub>max</sub></b>                   | 0.001                                                                                                                                                        |                           |
| <b>Final R indices</b>                     | 7111 data;<br>I > 2σ(I)                                                                                                                                      | R1 = 0.0635, wR2 = 0.1258 |
|                                            | all data                                                                                                                                                     | R1 = 0.1161, wR2 = 0.1496 |
| <b>Weighting scheme</b>                    | w = 1/[σ <sup>2</sup> (F <sub>o</sub> <sup>2</sup> ) + (0.0450P) <sup>2</sup> ]<br>where P = (F <sub>o</sub> <sup>2</sup> + 2F <sub>c</sub> <sup>2</sup> )/3 |                           |
| <b>Absolute structure parameter</b>        | 0.093(11)                                                                                                                                                    |                           |
| <b>Largest diff. peak and hole</b>         | 0.546 and -1.380 eÅ <sup>-3</sup>                                                                                                                            |                           |
| <b>R.M.S. deviation from mean</b>          | 0.116 eÅ <sup>-3</sup>                                                                                                                                       |                           |

**Table 7. Bond lengths (Å) for *trans*-19.**

|         |           |         |           |
|---------|-----------|---------|-----------|
| Br1-C17 | 1.898(10) | Br2-C36 | 1.903(9)  |
| Br3-C55 | 1.889(11) | C1-C6   | 1.381(15) |
| C1-C2   | 1.388(15) | C1-H1   | 0.95      |
| C2-C3   | 1.399(15) | C2-H2   | 0.95      |

|          |           |          |           |
|----------|-----------|----------|-----------|
| C3-C4    | 1.374(15) | C3-H3    | 0.95      |
| C4-C5    | 1.397(15) | C4-H4    | 0.95      |
| C5-C6    | 1.372(14) | C5-H5    | 0.95      |
| C6-C7    | 1.521(13) | C7-C11   | 1.513(13) |
| C7-C8    | 1.551(14) | C7-H7    | 1.0       |
| C8-C9    | 1.523(13) | C8-H8A   | 0.99      |
| C8-H8B   | 0.99      | C9-C10   | 1.506(13) |
| C9-H9A   | 0.99      | C9-H9B   | 0.99      |
| C10-O1   | 1.442(11) | C10-C12  | 1.534(12) |
| C10-H10  | 1.0       | C11-O1   | 1.434(10) |
| C11-H11A | 0.99      | C11-H11B | 0.99      |
| C12-C13  | 1.501(14) | C12-H12A | 0.99      |
| C12-H12B | 0.99      | C13-O2   | 1.223(11) |
| C13-C14  | 1.507(13) | C14-C15  | 1.374(13) |
| C14-C19  | 1.400(14) | C15-C16  | 1.390(14) |
| C15-H15  | 0.95      | C16-C17  | 1.382(14) |
| C16-H16  | 0.95      | C17-C18  | 1.383(14) |
| C18-C19  | 1.395(14) | C18-H18  | 0.95      |
| C19-H19  | 0.95      | C20-C21  | 1.390(15) |
| C20-C25  | 1.408(14) | C20-H20  | 0.95      |
| C21-C22  | 1.374(14) | C21-H21  | 0.95      |
| C22-C23  | 1.378(15) | C22-H22  | 0.95      |
| C23-C24  | 1.390(15) | C23-H23  | 0.95      |
| C24-C25  | 1.382(13) | C24-H24  | 0.95      |
| C25-C26  | 1.516(13) | C26-C30  | 1.515(13) |
| C26-C27  | 1.535(14) | C26-H26  | 1.0       |
| C27-C28  | 1.523(13) | C27-H27A | 0.99      |
| C27-H27B | 0.99      | C28-C29  | 1.508(13) |
| C28-H28A | 0.99      | C28-H28B | 0.99      |
| C29-O3   | 1.431(11) | C29-C31  | 1.515(12) |
| C29-H29  | 1.0       | C30-O3   | 1.430(10) |
| C30-H30A | 0.99      | C30-H30B | 0.99      |
| C31-C32  | 1.504(13) | C31-H31A | 0.99      |
| C31-H31B | 0.99      | C32-O4   | 1.218(11) |
| C32-C33  | 1.496(14) | C33-C38  | 1.392(13) |
| C33-C34  | 1.408(14) | C34-C35  | 1.369(14) |
| C34-H34  | 0.95      | C35-C36  | 1.379(13) |
| C35-H35  | 0.95      | C36-C37  | 1.400(13) |
| C37-C38  | 1.403(14) | C37-H37  | 0.95      |
| C38-H38  | 0.95      | C39-C40  | 1.406(15) |
| C39-C44  | 1.416(14) | C39-H39  | 0.95      |
| C40-C41  | 1.364(15) | C40-H40  | 0.95      |
| C41-C42  | 1.408(16) | C41-H41  | 0.95      |
| C42-C43  | 1.387(15) | C42-H42  | 0.95      |
| C43-C44  | 1.408(14) | C43-H43  | 0.95      |
| C44-C45  | 1.503(14) | C45-C49  | 1.509(12) |
| C45-C46  | 1.528(13) | C45-H45  | 1.0       |
| C46-C47  | 1.517(14) | C46-H46A | 0.99      |
| C46-H46B | 0.99      | C47-C48  | 1.522(13) |



|          |           |          |           |
|----------|-----------|----------|-----------|
| C47-H47A | 0.99      | C47-H47B | 0.99      |
| C48-O5   | 1.449(11) | C48-C50  | 1.497(14) |
| C48-H48  | 1.0       | C49-O5   | 1.435(11) |
| C49-H49A | 0.99      | C49-H49B | 0.99      |
| C50-C51  | 1.511(14) | C50-H50A | 0.99      |
| C50-H50B | 0.99      | C51-O6   | 1.234(11) |
| C51-C52  | 1.511(15) | C52-C57  | 1.380(14) |
| C52-C53  | 1.392(14) | C53-C54  | 1.385(14) |
| C53-H53  | 0.95      | C54-C55  | 1.380(15) |
| C54-H54  | 0.95      | C55-C56  | 1.385(15) |
| C56-C57  | 1.378(15) | C56-H56  | 0.95      |
| C57-H57  | 0.95      |          |           |

**Table 8. Bond angles (°) for *trans*-19.**

|              |           |               |           |
|--------------|-----------|---------------|-----------|
| C6-C1-C2     | 121.1(10) | C6-C1-H1      | 119.5     |
| C2-C1-H1     | 119.5     | C1-C2-C3      | 120.3(9)  |
| C1-C2-H2     | 119.9     | C3-C2-H2      | 119.9     |
| C4-C3-C2     | 118.6(10) | C4-C3-H3      | 120.7     |
| C2-C3-H3     | 120.7     | C3-C4-C5      | 120.3(10) |
| C3-C4-H4     | 119.9     | C5-C4-H4      | 119.9     |
| C6-C5-C4     | 121.6(10) | C6-C5-H5      | 119.2     |
| C4-C5-H5     | 119.2     | C5-C6-C1      | 118.2(10) |
| C5-C6-C7     | 120.0(9)  | C1-C6-C7      | 121.8(9)  |
| C11-C7-C6    | 114.6(8)  | C11-C7-C8     | 109.4(8)  |
| C6-C7-C8     | 111.0(8)  | C11-C7-H7     | 107.1     |
| C6-C7-H7     | 107.1     | C8-C7-H7      | 107.1     |
| C9-C8-C7     | 110.5(8)  | C9-C8-H8A     | 109.5     |
| C7-C8-H8A    | 109.5     | C9-C8-H8B     | 109.5     |
| C7-C8-H8B    | 109.5     | H8A-C8-H8B    | 108.1     |
| C10-C9-C8    | 110.6(8)  | C10-C9-H9A    | 109.5     |
| C8-C9-H9A    | 109.5     | C10-C9-H9B    | 109.5     |
| C8-C9-H9B    | 109.5     | H9A-C9-H9B    | 108.1     |
| O1-C10-C9    | 110.2(8)  | O1-C10-C12    | 106.3(7)  |
| C9-C10-C12   | 114.6(8)  | O1-C10-H10    | 108.5     |
| C9-C10-H10   | 108.5     | C12-C10-H10   | 108.5     |
| O1-C11-C7    | 112.1(8)  | O1-C11-H11A   | 109.2     |
| C7-C11-H11A  | 109.2     | O1-C11-H11B   | 109.2     |
| C7-C11-H11B  | 109.2     | H11A-C11-H11B | 107.9     |
| C13-C12-C10  | 112.7(8)  | C13-C12-H12A  | 109.0     |
| C10-C12-H12A | 109.0     | C13-C12-H12B  | 109.0     |
| C10-C12-H12B | 109.0     | H12A-C12-H12B | 107.8     |
| O2-C13-C12   | 121.3(9)  | O2-C13-C14    | 120.4(9)  |
| C12-C13-C14  | 118.2(8)  | C15-C14-C19   | 118.5(9)  |
| C15-C14-C13  | 123.3(9)  | C19-C14-C13   | 118.2(8)  |
| C14-C15-C16  | 121.5(9)  | C14-C15-H15   | 119.2     |
| C16-C15-H15  | 119.2     | C17-C16-C15   | 118.5(9)  |
| C17-C16-H16  | 120.7     | C15-C16-H16   | 120.7     |
| C16-C17-C18  | 122.2(10) | C16-C17-Br1   | 119.7(7)  |
| C18-C17-Br1  | 118.1(8)  | C17-C18-C19   | 117.7(10) |

|               |           |              |           |
|---------------|-----------|--------------|-----------|
| C17-C18-H18   | 121.1     | C19-C18-H18  | 121.1     |
| C18-C19-C14   | 121.4(9)  | C18-C19-H19  | 119.3     |
| C14-C19-H19   | 119.3     | C21-C20-C25  | 119.6(9)  |
| C21-C20-H20   | 120.2     | C25-C20-H20  | 120.2     |
| C22-C21-C20   | 121.9(10) | C22-C21-H21  | 119.0     |
| C20-C21-H21   | 119.0     | C21-C22-C23  | 118.1(10) |
| C21-C22-H22   | 121.0     | C23-C22-H22  | 121.0     |
| C22-C23-C24   | 121.5(10) | C22-C23-H23  | 119.2     |
| C24-C23-H23   | 119.2     | C25-C24-C23  | 120.5(10) |
| C25-C24-H24   | 119.7     | C23-C24-H24  | 119.7     |
| C24-C25-C20   | 118.4(9)  | C24-C25-C26  | 120.8(9)  |
| C20-C25-C26   | 120.9(9)  | C30-C26-C25  | 113.1(8)  |
| C30-C26-C27   | 109.9(8)  | C25-C26-C27  | 112.0(8)  |
| C30-C26-H26   | 107.2     | C25-C26-H26  | 107.2     |
| C27-C26-H26   | 107.2     | C28-C27-C26  | 109.3(8)  |
| C28-C27-H27A  | 109.8     | C26-C27-H27A | 109.8     |
| C28-C27-H27B  | 109.8     | C26-C27-H27B | 109.8     |
| H27A-C27-H27B | 108.3     | C29-C28-C27  | 111.6(8)  |
| C29-C28-H28A  | 109.3     | C27-C28-H28A | 109.3     |
| C29-C28-H28B  | 109.3     | C27-C28-H28B | 109.3     |
| H28A-C28-H28B | 108.0     | O3-C29-C28   | 109.5(8)  |
| O3-C29-C31    | 106.0(7)  | C28-C29-C31  | 114.6(8)  |
| O3-C29-H29    | 108.8     | C28-C29-H29  | 108.8     |
| C31-C29-H29   | 108.8     | O3-C30-C26   | 111.9(8)  |
| O3-C30-H30A   | 109.2     | C26-C30-H30A | 109.2     |
| O3-C30-H30B   | 109.2     | C26-C30-H30B | 109.2     |
| H30A-C30-H30B | 107.9     | C32-C31-C29  | 113.1(8)  |
| C32-C31-H31A  | 109.0     | C29-C31-H31A | 109.0     |
| C32-C31-H31B  | 109.0     | C29-C31-H31B | 109.0     |
| H31A-C31-H31B | 107.8     | O4-C32-C33   | 120.7(9)  |
| O4-C32-C31    | 120.8(9)  | C33-C32-C31  | 118.5(8)  |
| C38-C33-C34   | 119.1(9)  | C38-C33-C32  | 123.1(9)  |
| C34-C33-C32   | 117.8(9)  | C35-C34-C33  | 120.9(9)  |
| C35-C34-H34   | 119.5     | C33-C34-H34  | 119.5     |
| C34-C35-C36   | 119.4(10) | C34-C35-H35  | 120.3     |
| C36-C35-H35   | 120.3     | C35-C36-C37  | 121.9(9)  |
| C35-C36-Br2   | 119.1(8)  | C37-C36-Br2  | 118.9(7)  |
| C36-C37-C38   | 118.0(9)  | C36-C37-H37  | 121.0     |
| C38-C37-H37   | 121.0     | C33-C38-C37  | 120.5(10) |
| C33-C38-H38   | 119.7     | C37-C38-H38  | 119.7     |
| C40-C39-C44   | 119.7(10) | C40-C39-H39  | 120.2     |
| C44-C39-H39   | 120.2     | C41-C40-C39  | 122.4(10) |
| C41-C40-H40   | 118.8     | C39-C40-H40  | 118.8     |
| C40-C41-C42   | 118.4(11) | C40-C41-H41  | 120.8     |
| C42-C41-H41   | 120.8     | C43-C42-C41  | 120.7(10) |
| C43-C42-H42   | 119.7     | C41-C42-H42  | 119.7     |
| C42-C43-C44   | 121.4(10) | C42-C43-H43  | 119.3     |
| C44-C43-H43   | 119.3     | C43-C44-C39  | 117.5(10) |
| C43-C44-C45   | 120.9(9)  | C39-C44-C45  | 121.3(9)  |

|              |           |               |           |
|--------------|-----------|---------------|-----------|
| C44-C45-C49  | 109.7(8)  | C44-C45-C46   | 116.1(8)  |
| C49-C45-C46  | 107.8(8)  | C44-C45-H45   | 107.6     |
| C49-C45-H45  | 107.6     | C46-C45-H45   | 107.6     |
| C47-C46-C45  | 110.1(8)  | C47-C46-H46A  | 109.6     |
| C45-C46-H46A | 109.6     | C47-C46-H46B  | 109.6     |
| C45-C46-H46B | 109.6     | H46A-C46-H46B | 108.2     |
| C46-C47-C48  | 112.3(8)  | C46-C47-H47A  | 109.2     |
| C48-C47-H47A | 109.2     | C46-C47-H47B  | 109.2     |
| C48-C47-H47B | 109.2     | H47A-C47-H47B | 107.9     |
| O5-C48-C50   | 104.2(7)  | O5-C48-C47    | 110.0(7)  |
| C50-C48-C47  | 113.8(9)  | O5-C48-H48    | 109.5     |
| C50-C48-H48  | 109.5     | C47-C48-H48   | 109.5     |
| O5-C49-C45   | 113.4(8)  | O5-C49-H49A   | 108.9     |
| C45-C49-H49A | 108.9     | O5-C49-H49B   | 108.9     |
| C45-C49-H49B | 108.9     | H49A-C49-H49B | 107.7     |
| C48-C50-C51  | 115.5(8)  | C48-C50-H50A  | 108.4     |
| C51-C50-H50A | 108.4     | C48-C50-H50B  | 108.4     |
| C51-C50-H50B | 108.4     | H50A-C50-H50B | 107.5     |
| O6-C51-C50   | 121.4(10) | O6-C51-C52    | 119.3(9)  |
| C50-C51-C52  | 119.2(8)  | C57-C52-C53   | 119.5(10) |
| C57-C52-C51  | 120.3(10) | C53-C52-C51   | 120.2(9)  |
| C54-C53-C52  | 119.9(9)  | C54-C53-H53   | 120.0     |
| C52-C53-H53  | 120.0     | C55-C54-C53   | 119.6(10) |
| C55-C54-H54  | 120.2     | C53-C54-H54   | 120.2     |
| C54-C55-C56  | 120.8(11) | C54-C55-Br3   | 119.9(8)  |
| C56-C55-Br3  | 119.3(9)  | C57-C56-C55   | 119.1(10) |
| C57-C56-H56  | 120.4     | C55-C56-H56   | 120.4     |
| C56-C57-C52  | 120.9(10) | C56-C57-H57   | 119.5     |
| C52-C57-H57  | 119.5     | C11-O1-C10    | 111.2(7)  |
| C30-O3-C29   | 111.3(7)  | C49-O5-C48    | 113.0(7)  |

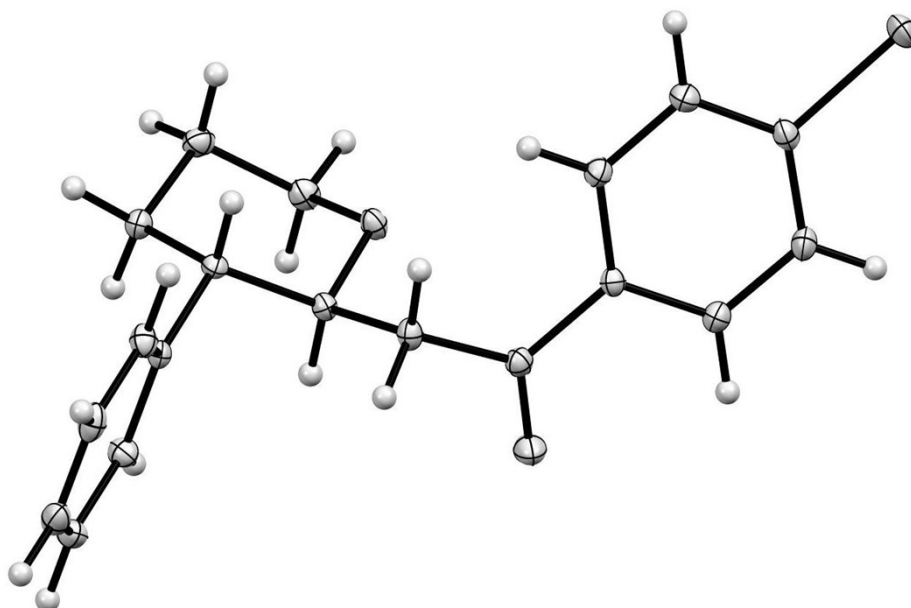

Figure 43 ORTEP diagram of *trans*-21 with 50% probability

Table 9. Sample and crystal data for *trans*-21.

|                        |                                                  |                  |
|------------------------|--------------------------------------------------|------------------|
| Chemical formula       | C <sub>19</sub> H <sub>19</sub> BrO <sub>2</sub> |                  |
| Formula weight         | 359.25 g/mol                                     |                  |
| Temperature            | 100(2) K                                         |                  |
| Wavelength             | 0.71073 Å                                        |                  |
| Crystal size           | 0.060 x 0.120 x 0.320 mm                         |                  |
| Crystal habit          | colorless needle                                 |                  |
| Crystal system         | monoclinic                                       |                  |
| Space group            | P 1 21/c 1                                       |                  |
| Unit cell dimensions   | a = 15.9582(5) Å                                 | α = 90°          |
|                        | b = 9.1314(3) Å                                  | β = 91.0981(11)° |
|                        | c = 10.7679(3) Å                                 | γ = 90°          |
| Volume                 | 1568.82(8) Å <sup>3</sup>                        |                  |
| Z                      | 4                                                |                  |
| Density (calculated)   | 1.521 g/cm <sup>3</sup>                          |                  |
| Absorption coefficient | 2.625 mm <sup>-1</sup>                           |                  |
| F(000)                 | 736                                              |                  |

Table 10. Data collection and structure refinement for *trans*-21.

|                                     |                                             |
|-------------------------------------|---------------------------------------------|
| Theta range for data collection     | 2.55 to 36.35°                              |
| Index ranges                        | -26 ≤ h ≤ 26, -15 ≤ k ≤ 15, -13 ≤ l ≤ 17    |
| Reflections collected               | 27317                                       |
| Independent reflections             | 7552 [R(int) = 0.0455]                      |
| Coverage of independent reflections | 99.0%                                       |
| Absorption correction               | Multi-Scan                                  |
| Max. and min. transmission          | 0.8580 and 0.4870                           |
| Structure solution technique        | direct methods                              |
| Structure solution program          | XS, VERSION 2013/1                          |
| Refinement method                   | Full-matrix least-squares on F <sup>2</sup> |

|                                          |                                                                                                                         |
|------------------------------------------|-------------------------------------------------------------------------------------------------------------------------|
| <b>Refinement program</b>                | SHELXL-2014/7 (Sheldrick, 2014)                                                                                         |
| <b>Function minimized</b>                | $\Sigma w(F_o^2 - F_c^2)^2$                                                                                             |
| <b>Data / restraints / parameters</b>    | 7552 / 0 / 199                                                                                                          |
| <b>Goodness-of-fit on F<sup>2</sup></b>  | 1.027                                                                                                                   |
| <b><math>\Delta/\sigma_{\max}</math></b> | 0.002                                                                                                                   |
| <b>Final R indices</b>                   | 5423 data; I>2 $\sigma$ (I) R1 = 0.0380, wR2 = 0.0760<br>all data R1 = 0.0677, wR2 = 0.0847                             |
| <b>Weighting scheme</b>                  | w=1/[ $\sigma^2(F_o^2)+(0.0316P)^2+0.5508P$ ]<br>where P=(F <sub>o</sub> <sup>2</sup> +2F <sub>c</sub> <sup>2</sup> )/3 |
| <b>Largest diff. peak and hole</b>       | 0.564 and -0.715 eÅ <sup>-3</sup>                                                                                       |
| <b>R.M.S. deviation from mean</b>        | 0.092 eÅ <sup>-3</sup>                                                                                                  |

**Table 11. Bond lengths (Å) for *trans*-21.**

|         |            |         |            |
|---------|------------|---------|------------|
| Br1-C11 | 1.8976(13) | C1-C7   | 1.5150(18) |
| C1-C2   | 1.5282(18) | C2-O1   | 1.4342(15) |
| C2-C3   | 1.5397(17) | C3-C14  | 1.5142(18) |
| C3-C4   | 1.5367(18) | C4-C5   | 1.5255(19) |
| C5-C6   | 1.517(2)   | C6-O1   | 1.4279(16) |
| C7-O2   | 1.2215(16) | C7-C8   | 1.4947(18) |
| C8-C13  | 1.3956(18) | C8-C9   | 1.3984(18) |
| C9-C10  | 1.3841(19) | C10-C11 | 1.3879(19) |
| C11-C12 | 1.3837(19) | C12-C13 | 1.3899(19) |
| C14-C19 | 1.3908(18) | C14-C15 | 1.4000(18) |
| C15-C16 | 1.3881(19) | C16-C17 | 1.396(2)   |
| C17-C18 | 1.384(2)   | C18-C19 | 1.396(2)   |

**Table 12. Bond angles (°) for *trans*-21.**

|             |            |             |            |
|-------------|------------|-------------|------------|
| C7-C1-C2    | 109.94(10) | O1-C2-C1    | 105.92(10) |
| O1-C2-C3    | 111.25(10) | C1-C2-C3    | 112.53(10) |
| C14-C3-C4   | 111.75(10) | C14-C3-C2   | 111.72(10) |
| C4-C3-C2    | 110.05(10) | C5-C4-C3    | 111.07(11) |
| C6-C5-C4    | 109.06(11) | O1-C6-C5    | 110.48(11) |
| O2-C7-C8    | 120.02(12) | O2-C7-C1    | 119.62(12) |
| C8-C7-C1    | 120.33(11) | C13-C8-C9   | 119.23(12) |
| C13-C8-C7   | 122.17(11) | C9-C8-C7    | 118.49(11) |
| C10-C9-C8   | 120.86(12) | C9-C10-C11  | 118.51(12) |
| C12-C11-C10 | 122.09(12) | C12-C11-Br1 | 118.63(10) |
| C10-C11-Br1 | 119.26(10) | C11-C12-C13 | 118.76(12) |
| C12-C13-C8  | 120.50(12) | C19-C14-C15 | 118.28(12) |
| C19-C14-C3  | 121.24(11) | C15-C14-C3  | 120.48(11) |
| C16-C15-C14 | 121.05(13) | C15-C16-C17 | 120.13(13) |
| C18-C17-C16 | 119.21(13) | C17-C18-C19 | 120.56(13) |
| C14-C19-C18 | 120.77(13) | C6-O1-C2    | 111.86(10) |
