# Supplementary material for: How an early or late transition state impacts the stereoselectivity of tetrahydropyran formation by intramolecular oxa-Michael addition
Source: Royal Society of Chemistry journal article supplement (doi:10.1039/c9ob00750d), 2019-01-01
Supplement: c9ob00750d4.pdf [file c9ob00750d4.pdf]

## How an Early or Late Transition State Impacts the Stereoselectivity of Tetrahydropyran Formation by Intramolecular oxa-Michael Addition

Dániel Csókás,<sup>a</sup> Annabel Ho Xuan Ying,<sup>a</sup>  
Raghunath O. Ramabhadran<sup>b\*</sup> and Roderick W. Bates<sup>a\*</sup>

a. Division of Chemistry and Biological Chemistry, School of Physical and Mathematical Sciences, Nanyang Technological University, 21 Nanyang Link, Singapore 637371

b. Indian Institute of Science Education and Research (IISER) Tirupati, Transit Campus - Sree Rama Engineering College, Mangalam P/O, Tirupati - 517507, Andhra Pradesh, India

### Supporting Information III: Details of computational studies Table of Contents

|                                                                                    |           |
|------------------------------------------------------------------------------------|-----------|
| <b>acid-catalysed oxa-Michael cyclisation (Figure 1)</b>                           | <b>2</b>  |
| <b>10b-protonated</b>                                                              | 2         |
| Transition state <b>1.1-trans</b>                                                  | 3         |
| Transition state <b>1.1-cis</b>                                                    | 4         |
| Enol <b>1.2-trans</b>                                                              | 5         |
| Enol <b>1.2-cis</b>                                                                | 6         |
| THP <b>1.3-trans</b>                                                               | 7         |
| THP <b>1.3-cis</b>                                                                 | 8         |
| <b>base-catalysed oxa-Michael cyclisation (<i>E</i>-alkene, Figures 2 &amp; 3)</b> | <b>9</b>  |
| <b>10a-alkoxide</b>                                                                | 9         |
| Transition state <b>2.1-cis</b>                                                    | 10        |
| Transition state <b>2.1-trans</b>                                                  | 11        |
| Transition state <b>2.2-cis</b>                                                    | 12        |
| Transition state <b>2.2-trans</b>                                                  | 13        |
| Transition state <b>3.1-cis</b>                                                    | 14        |
| Transition state <b>3.1-trans</b>                                                  | 15        |
| Transition state with chelation <b>3.2-cis</b>                                     | 16        |
| Transition state with chelation <b>3.2-trans</b>                                   | 17        |
| <b>base-catalysed oxa-Michael cyclisation (<i>Z</i>-alkene, Figure 5)</b>          | <b>18</b> |
| Transition state <b>5.1-cis</b>                                                    | 18        |
| Transition state <b>5.1-trans</b>                                                  | 19        |
| <b>Validation of the computational method</b>                                      | <b>20</b> |
| <b>Definition of pyramidalization of <math>\beta</math>-carbon</b>                 | <b>23</b> |

## acid-catalysed oxa-Michael cyclisation

### 10b-protonated

$E(\text{wb97xd}/6\text{-}311++\text{G}(3\text{df},3\text{pd})/\text{SMD}(\text{MeOH})) = -3460.534882$

Thermal correction to Enthalpy ( $\text{wb97xd}/6\text{-}311+\text{G}(\text{d},\text{p})/\text{SMD}(\text{MeOH})) = 0.370124$

1 1

|    |             |             |             |
|----|-------------|-------------|-------------|
| C  | -0.30963600 | -1.31419500 | -0.12995900 |
| C  | -0.58010000 | -0.57509200 | -1.43716100 |
| C  | -0.20124000 | -1.38314200 | -2.67835900 |
| C  | -0.81855100 | -0.53127900 | 1.07198800  |
| H  | -1.64489900 | -0.32887700 | -1.51127800 |
| H  | -0.79442700 | -2.29708200 | -0.15904900 |
| H  | 0.76522300  | -1.49295000 | -0.02245800 |
| H  | -1.89695800 | -0.33580600 | 0.98714600  |
| H  | -0.36791000 | 0.47181100  | 1.10607100  |
| H  | -0.80617100 | -2.29343500 | -2.70377000 |
| O  | -0.56232800 | -0.67349700 | -3.86614200 |
| C  | -0.60049500 | -1.13131400 | 2.40490300  |
| H  | -1.00118900 | -0.56961300 | 3.24516700  |
| C  | 0.04195500  | -2.29680400 | 2.64782900  |
| H  | 0.45572400  | -2.88836500 | 1.84309100  |
| C  | 0.21426300  | -2.78946300 | 3.97177300  |
| O  | -0.15831900 | -2.02512400 | 4.94548000  |
| H  | -0.02560200 | 0.37223000  | -1.44840600 |
| C  | 3.95721800  | -2.53860000 | -2.61965000 |
| C  | 2.96150200  | -3.49823700 | -2.47766500 |
| C  | 1.62111200  | -3.12215500 | -2.51254700 |
| C  | 1.26059100  | -1.78737500 | -2.68388100 |
| C  | 2.26745600  | -0.82973200 | -2.82199900 |
| C  | 3.60600300  | -1.20190900 | -2.79439200 |
| H  | 5.00225500  | -2.82867000 | -2.59668000 |
| H  | 3.22601400  | -4.54195400 | -2.34388700 |
| H  | 0.84598800  | -3.87518600 | -2.40406200 |
| H  | 2.00637400  | 0.21662800  | -2.95321700 |
| H  | 4.37806300  | -0.44795000 | -2.90687500 |
| H  | -0.19995500 | 0.21682900  | -3.82020800 |
| C  | 0.81018300  | -4.09208500 | 4.24016800  |
| C  | 1.49895900  | -4.32309100 | 5.43912600  |
| C  | 0.69603900  | -5.12212800 | 3.29742600  |
| C  | 2.06649900  | -5.55833900 | 5.69244400  |
| H  | 1.63628300  | -3.53072100 | 6.16745000  |
| C  | 1.24258300  | -6.36694200 | 3.55456600  |
| H  | 0.15130500  | -4.97121300 | 2.37392500  |
| C  | 1.92619500  | -6.57028500 | 4.74829700  |
| H  | 2.61415400  | -5.72260400 | 6.61162300  |
| H  | 1.13339700  | -7.16365700 | 2.82971400  |
| Br | 2.69149500  | -8.26873300 | 5.09732900  |
| H  | -0.11500200 | -2.44604400 | 5.81698900  |

### Transition state 1.1-trans

$E(\text{wb97xd/6-311++G(3df,3pd)/SMD(MeOH)}) = -3460.526603$

Thermal correction to Enthalpy (wb97xd/6-311+G(d,p)/SMD(MeOH)) = 0.369429

Imaginary frequency: 233.48i

1 1

|    |             |             |             |
|----|-------------|-------------|-------------|
| C  | 1.09330700  | -1.62008800 | -3.51345000 |
| C  | 2.19844300  | -0.77847200 | -4.06221800 |
| H  | 3.15777100  | -1.19719200 | -3.75086100 |
| H  | 2.13752000  | -0.88507800 | -5.15260200 |
| C  | 2.11381000  | 0.70152200  | -3.67598900 |
| H  | 1.16493300  | 1.13065300  | -4.01309300 |
| C  | 2.27965700  | 0.92964100  | -2.17357900 |
| H  | 2.18910300  | 1.99576500  | -1.94897300 |
| H  | 3.27839000  | 0.61249600  | -1.85290800 |
| C  | 1.24317500  | 0.19137100  | -1.33849700 |
| H  | 0.23476800  | 0.47104600  | -1.66192400 |
| O  | 1.42567900  | -1.22142300 | -1.62224200 |
| H  | 0.76503200  | -1.73445900 | -1.13805700 |
| H  | 2.90468300  | 1.23770100  | -4.20572800 |
| C  | 1.37388700  | 0.42984100  | 0.14474000  |
| C  | 0.37190600  | 1.11206500  | 0.83089700  |
| C  | 2.50222800  | -0.00933600 | 0.84038600  |
| C  | 0.49685400  | 1.36299600  | 2.19441000  |
| H  | -0.51049500 | 1.44950200  | 0.29558500  |
| C  | 2.62379100  | 0.23376800  | 2.20266400  |
| H  | 3.28536200  | -0.54673300 | 0.31543300  |
| C  | 1.62216400  | 0.92316500  | 2.88222200  |
| H  | -0.28833000 | 1.89669100  | 2.71900800  |
| H  | 3.50244100  | -0.11302900 | 2.73600200  |
| H  | 1.71934900  | 1.11400200  | 3.94562200  |
| H  | 1.33012200  | -2.66006800 | -3.31813700 |
| C  | -0.25700700 | -1.30128500 | -3.77019600 |
| H  | -0.50693300 | -0.36321300 | -4.24627200 |
| C  | -1.27720600 | -2.15387600 | -3.44290900 |
| O  | -0.99207800 | -3.30417600 | -2.85135600 |
| H  | -1.78576200 | -3.78349100 | -2.58142300 |
| C  | -2.69069900 | -1.84447600 | -3.73133200 |
| C  | -3.56674400 | -2.85952700 | -4.12542200 |
| C  | -3.16315600 | -0.53535000 | -3.61388800 |
| C  | -4.89490800 | -2.57402000 | -4.40368700 |
| H  | -3.21537100 | -3.87885500 | -4.24728000 |
| C  | -4.49196400 | -0.24182200 | -3.87972900 |
| H  | -2.50168900 | 0.25970100  | -3.29007500 |
| C  | -5.34404500 | -1.26608300 | -4.27373100 |
| H  | -5.56175800 | -3.36618000 | -4.72057000 |
| H  | -4.85201900 | 0.77399400  | -3.77351700 |
| Br | -7.16646500 | -0.86830400 | -4.64023000 |

### Transition state 1.1-cis

$E(\text{wb97xd/6-311++G(3df,3pd)/SMD(MeOH)}) = -3460.527746$

Thermal correction to Enthalpy (wb97xd/6-311+G(d,p)/SMD(MeOH)) = 0.369441

Imaginary frequency: 215.10i

1 1

|    |             |              |             |
|----|-------------|--------------|-------------|
| C  | 0.37561600  | -4.07536700  | -2.73617600 |
| O  | -0.83124800 | -3.65882300  | -2.38069100 |
| C  | 1.30955400  | -3.15840700  | -3.13874600 |
| C  | 1.03563700  | -1.77639900  | -3.16807200 |
| C  | 1.91600100  | -0.83935200  | -3.91451400 |
| H  | 2.96271000  | -1.12919600  | -3.78065600 |
| H  | 1.67331000  | -1.01667600  | -4.97137500 |
| H  | 2.28386200  | -3.51105400  | -3.45070400 |
| H  | 0.00083900  | -1.46667700  | -3.05010400 |
| C  | 1.69351200  | 0.63482500   | -3.58052300 |
| H  | 0.64508800  | 0.89463600   | -3.76624300 |
| C  | 2.06259800  | 0.99043800   | -2.14203800 |
| H  | 1.90588600  | 2.05902100   | -1.97212200 |
| H  | 3.12349200  | 0.78386700   | -1.96075500 |
| C  | 1.23292500  | 0.23566000   | -1.11537400 |
| H  | 0.16834200  | 0.42120100   | -1.28952700 |
| O  | 1.48209000  | -1.17755100  | -1.35376800 |
| H  | 0.91734300  | -1.70842700  | -0.77566000 |
| H  | -1.37237700 | -4.37212800  | -2.01974600 |
| H  | 2.29645500  | 1.23931000   | -4.26232500 |
| C  | 1.57998600  | 0.58232400   | 0.31082700  |
| C  | 0.66624100  | 1.27576600   | 1.10111700  |
| C  | 2.82372700  | 0.23905500   | 0.84458600  |
| C  | 0.99168200  | 1.63195900   | 2.40688100  |
| H  | -0.30447200 | 1.54055900   | 0.69303600  |
| C  | 3.14557100  | 0.58648700   | 2.15054400  |
| H  | 3.54011300  | -0.30500200  | 0.23761000  |
| C  | 2.23089700  | 1.28651700   | 2.93396500  |
| H  | 0.27367900  | 2.17410400   | 3.01285200  |
| H  | 4.11290100  | 0.31318900   | 2.55840300  |
| H  | 2.48436900  | 1.55906100   | 3.95284400  |
| C  | 0.65284700  | -5.52419500  | -2.70868300 |
| C  | 1.91183200  | -5.99242700  | -2.32595300 |
| C  | -0.33877900 | -6.43717200  | -3.07646400 |
| C  | 2.17864500  | -7.35286600  | -2.30589000 |
| H  | 2.68524000  | -5.29829800  | -2.01908300 |
| C  | -0.07763100 | -7.79921300  | -3.07187700 |
| H  | -1.31644000 | -6.09402600  | -3.39775700 |
| C  | 1.18028300  | -8.24214600  | -2.68377700 |
| H  | 3.15338200  | -7.70754600  | -1.99476600 |
| H  | -0.84835500 | -8.49774600  | -3.37305400 |
| Br | 1.54480500  | -10.10770600 | -2.66893400 |

## Enol 1.2-trans

$E(\text{wb97xd}/6\text{-}311\text{++G}(3\text{df},3\text{pd})/\text{SMD}(\text{MeOH})) = -3460.530372$

Thermal correction to Enthalpy ( $\text{wb97xd}/6\text{-}311\text{+G}(\text{d,p})/\text{SMD}(\text{MeOH})) = 0.371799$

1 1

|    |             |             |             |
|----|-------------|-------------|-------------|
| C  | 1.11829000  | -1.41462900 | -3.44258700 |
| C  | 2.14645500  | -0.55758100 | -4.15249400 |
| H  | 3.13804500  | -0.97894900 | -3.96553300 |
| H  | 1.94840500  | -0.64361300 | -5.22400300 |
| C  | 2.11159100  | 0.90376800  | -3.70497300 |
| H  | 1.16052700  | 1.36837300  | -3.98358100 |
| C  | 2.31837800  | 1.02047100  | -2.19550300 |
| H  | 2.21710800  | 2.05840000  | -1.86856700 |
| H  | 3.32322800  | 0.68418700  | -1.92177600 |
| C  | 1.29231100  | 0.21413700  | -1.42618100 |
| H  | 0.27729200  | 0.52580500  | -1.67955600 |
| O  | 1.42000000  | -1.19645600 | -1.92993800 |
| H  | 0.87111700  | -1.79696300 | -1.39712000 |
| H  | 2.89850300  | 1.45528200  | -4.22362900 |
| C  | 1.46775200  | 0.16817800  | 0.06277400  |
| C  | 0.42616300  | 0.59300000  | 0.88517200  |
| C  | 2.65835200  | -0.28515800 | 0.63460700  |
| C  | 0.57637500  | 0.58172800  | 2.26806400  |
| H  | -0.50252800 | 0.93775800  | 0.44172000  |
| C  | 2.80219200  | -0.30709800 | 2.01555200  |
| H  | 3.47070900  | -0.62616700 | 0.00145500  |
| C  | 1.76336000  | 0.13032500  | 2.83369700  |
| H  | -0.23608900 | 0.91983800  | 2.90173800  |
| H  | 3.72717400  | -0.66349800 | 2.45535500  |
| H  | 1.88016600  | 0.11655100  | 3.91195900  |
| H  | 1.35180600  | -2.47335900 | -3.52529500 |
| C  | -0.29861100 | -1.10739500 | -3.73145800 |
| H  | -0.55734700 | -0.11420100 | -4.08236800 |
| C  | -1.28580300 | -1.99418800 | -3.54258000 |
| O  | -2.56143300 | -1.61039900 | -3.77775400 |
| H  | -3.16474400 | -2.35518700 | -3.67877000 |
| C  | -1.09523800 | -3.38630200 | -3.05306600 |
| C  | -0.58309900 | -4.37158200 | -3.89473900 |
| C  | -1.43228900 | -3.70645600 | -1.73825300 |
| C  | -0.40153700 | -5.66802600 | -3.42967400 |
| H  | -0.32124300 | -4.12735300 | -4.91822100 |
| C  | -1.25255800 | -4.99824700 | -1.26122400 |
| H  | -1.82937100 | -2.94333100 | -1.07750700 |
| C  | -0.73700600 | -5.96447000 | -2.11532000 |
| H  | -0.00260800 | -6.42873200 | -4.08954400 |
| H  | -1.50889400 | -5.23824500 | -0.23668300 |
| Br | -0.48312200 | -7.73673500 | -1.46669400 |

## Enol 1.2-cis

$E(\text{wb97xd}/6\text{-}311\text{++G}(3\text{df},3\text{pd})/\text{SMD}(\text{MeOH})) = -3460.533869$

Thermal correction to Enthalpy ( $\text{wb97xd}/6\text{-}311\text{+G}(\text{d,p})/\text{SMD}(\text{MeOH})) = 0.371435$

1 1

|    |             |              |             |
|----|-------------|--------------|-------------|
| C  | 0.36569600  | -4.02441700  | -2.64280900 |
| O  | -0.91093500 | -3.62800800  | -2.43830000 |
| C  | 1.32093400  | -3.10852100  | -2.87629200 |
| C  | 1.06177800  | -1.65701700  | -2.87227600 |
| C  | 1.87458200  | -0.84824300  | -3.85553400 |
| H  | 2.93092300  | -1.11720100  | -3.75042200 |
| H  | 1.55429300  | -1.15759000  | -4.85413700 |
| H  | 2.32694200  | -3.44294800  | -3.09690500 |
| H  | 0.00019000  | -1.41234700  | -2.91892900 |
| C  | 1.67809300  | 0.65336800   | -3.66471100 |
| H  | 0.63469900  | 0.91653100   | -3.87066700 |
| C  | 2.04384300  | 1.07776000   | -2.24445600 |
| H  | 1.83716900  | 2.13974800   | -2.08901000 |
| H  | 3.11106100  | 0.91902400   | -2.06158900 |
| C  | 1.24010400  | 0.32024600   | -1.20799200 |
| H  | 0.16788500  | 0.46002500   | -1.36181300 |
| O  | 1.48953200  | -1.14116800  | -1.47716400 |
| H  | 1.07275200  | -1.68962700  | -0.79043300 |
| H  | -1.45699200 | -4.35355700  | -2.11666300 |
| H  | 2.29747400  | 1.19853400   | -4.38004100 |
| C  | 1.61233300  | 0.57741000   | 0.22222500  |
| C  | 0.64764700  | 1.05955100   | 1.10443400  |
| C  | 2.91429200  | 0.35556600   | 0.67605300  |
| C  | 0.98264100  | 1.33400100   | 2.42650000  |
| H  | -0.36625800 | 1.22504200   | 0.75436500  |
| C  | 3.24353500  | 0.61754900   | 1.99919600  |
| H  | 3.66856400  | -0.02829400  | -0.00280900 |
| C  | 2.27951400  | 1.11153900   | 2.87481500  |
| H  | 0.22863800  | 1.71598900   | 3.10585900  |
| H  | 4.25486200  | 0.43999200   | 2.34810200  |
| H  | 2.54059700  | 1.32048900   | 3.90661600  |
| C  | 0.63907400  | -5.48145600  | -2.63803100 |
| C  | 1.80379000  | -5.97927600  | -2.05166300 |
| C  | -0.26240900 | -6.37184000  | -3.22489400 |
| C  | 2.07162700  | -7.34102600  | -2.05491800 |
| H  | 2.50302700  | -5.30380700  | -1.57246900 |
| C  | -0.00465200 | -7.73585000  | -3.23680900 |
| H  | -1.16826900 | -6.00595500  | -3.69636800 |
| C  | 1.16253100  | -8.20599600  | -2.65006100 |
| H  | 2.97527600  | -7.71514000  | -1.58944400 |
| H  | -0.70752000 | -8.41486000  | -3.70363000 |
| Br | 1.52029200  | -10.07564000 | -2.65562000 |

### THP 1.3-trans

$E(\text{wb97xd}/6-311++\text{G}(3\text{df},3\text{pd})/\text{SMD}(\text{MeOH})) = -3460.546513$

Thermal correction to Enthalpy ( $\text{wb97xd}/6-311+\text{G}(\text{d},\text{p})/\text{SMD}(\text{MeOH})) = 0.372284$

1 1

|    |             |             |             |
|----|-------------|-------------|-------------|
| C  | -0.01322300 | 0.01073600  | 0.03752600  |
| C  | 0.91176600  | 0.93145200  | -0.75346600 |
| H  | 1.93861400  | 0.60545900  | -0.55759100 |
| H  | 0.72375800  | 0.79633700  | -1.82211900 |
| C  | 0.76207200  | 2.39488800  | -0.34025300 |
| H  | -0.20797500 | 2.78735000  | -0.66604300 |
| C  | 0.88016500  | 2.52215600  | 1.17731800  |
| H  | 0.69026400  | 3.54940300  | 1.50139700  |
| H  | 1.89145900  | 2.25141100  | 1.50250100  |
| C  | -0.12459200 | 1.59960000  | 1.86100900  |
| H  | -1.13649100 | 1.91611700  | 1.57967700  |
| O  | 0.07412600  | 0.23896300  | 1.43944500  |
| H  | 1.52862200  | 2.99719000  | -0.83433600 |
| C  | -0.02537300 | 1.61139700  | 3.36475300  |
| C  | -1.04137300 | 2.17790200  | 4.13104400  |
| C  | 1.09083900  | 1.07308900  | 4.00807100  |
| C  | -0.94475800 | 2.21406200  | 5.51971100  |
| H  | -1.91575400 | 2.59316600  | 3.63869100  |
| C  | 1.18546200  | 1.10093700  | 5.39406800  |
| H  | 1.88722800  | 0.62653300  | 3.42167000  |
| C  | 0.16808000  | 1.67367900  | 6.15394800  |
| H  | -1.74252400 | 2.65928400  | 6.10479900  |
| H  | 2.05560200  | 0.67646100  | 5.88373800  |
| H  | 0.24367400  | 1.69623200  | 7.23590300  |
| H  | 0.30891200  | -1.02419500 | -0.08725600 |
| C  | -1.48630100 | 0.10882100  | -0.44513400 |
| H  | -1.54792800 | -0.33746300 | -1.44021700 |
| C  | -2.36543600 | -0.61917400 | 0.49659700  |
| O  | -3.12935700 | 0.13861700  | 1.18544400  |
| H  | -3.72325700 | -0.32213600 | 1.80046400  |
| C  | -2.33059000 | -2.05117200 | 0.68864200  |
| C  | -1.80614600 | -2.87284700 | -0.32164200 |
| C  | -2.78726500 | -2.63198900 | 1.88493500  |
| C  | -1.76193600 | -4.24439800 | -0.15584400 |
| H  | -1.45521900 | -2.45259000 | -1.25526100 |
| C  | -2.72869100 | -3.99956900 | 2.06279100  |
| H  | -3.14948900 | -2.02827900 | 2.70992100  |
| C  | -2.22318900 | -4.79301900 | 1.03588700  |
| H  | -1.37078600 | -4.87113900 | -0.94708400 |
| H  | -3.06580300 | -4.43735300 | 2.99357000  |
| Br | -2.15412200 | -6.66886500 | 1.27450700  |
| H  | -1.82884000 | 1.14119300  | -0.50470400 |

### THP 1.3-cis

$E(\text{wb97xd}/6\text{-}311\text{++G}(3\text{df},3\text{pd})/\text{SMD}(\text{MeOH})) = -3460.546828$

Thermal correction to Enthalpy ( $\text{wb97xd}/6\text{-}311\text{+G}(\text{d,p})/\text{SMD}(\text{MeOH})) = 0.371155$

1 1

|    |             |             |             |
|----|-------------|-------------|-------------|
| C  | -0.43292100 | 0.02803100  | 0.05365100  |
| O  | -1.44562100 | 0.59309300  | 0.58336500  |
| C  | 0.52684000  | 0.94324600  | -0.61200500 |
| C  | 0.24460500  | 2.42725300  | -0.46334100 |
| C  | 1.14653000  | 3.25639000  | -1.36977200 |
| H  | 2.19052000  | 2.98154300  | -1.17687700 |
| H  | 0.92521900  | 3.01501000  | -2.41350400 |
| H  | 1.52999500  | 0.72285400  | -0.23106400 |
| H  | -0.80487700 | 2.63867400  | -0.71095900 |
| C  | 0.93552700  | 4.74449400  | -1.09821800 |
| H  | -0.07079800 | 5.03379800  | -1.42482900 |
| C  | 1.08772100  | 5.03781300  | 0.39292800  |
| H  | 0.83040300  | 6.07713500  | 0.61682200  |
| H  | 2.12649800  | 4.87823800  | 0.70557500  |
| C  | 0.18633900  | 4.11644800  | 1.21533800  |
| H  | -0.86257200 | 4.31939300  | 0.95584900  |
| O  | 0.46542000  | 2.74773300  | 0.90730100  |
| H  | -2.06477200 | -0.00262700 | 1.03482000  |
| H  | 1.64501800  | 5.34076400  | -1.67789300 |
| C  | 0.36980900  | 4.30765500  | 2.69933800  |
| C  | -0.55610700 | 5.05059400  | 3.42891800  |
| C  | 1.48841300  | 3.78787500  | 3.35307900  |
| C  | -0.36927800 | 5.27545600  | 4.78989800  |
| H  | -1.43094000 | 5.45592700  | 2.92907000  |
| C  | 1.67191300  | 4.00398700  | 4.71397000  |
| H  | 2.21779000  | 3.20960700  | 2.79566000  |
| C  | 0.74459200  | 4.75070300  | 5.43622300  |
| H  | -1.09829700 | 5.85582300  | 5.34555200  |
| H  | 2.54295400  | 3.59128600  | 5.21216000  |
| H  | 0.88989400  | 4.92076200  | 6.49772700  |
| C  | -0.25228800 | -1.40778000 | 0.07353600  |
| C  | 0.94723400  | -1.96190500 | -0.40280200 |
| C  | -1.26191100 | -2.26404000 | 0.54481800  |
| C  | 1.14179300  | -3.32983800 | -0.39487300 |
| H  | 1.74359900  | -1.33218000 | -0.77661400 |
| C  | -1.07695600 | -3.63181700 | 0.55143200  |
| H  | -2.21844600 | -1.89301400 | 0.89583300  |
| C  | 0.12727200  | -4.15166800 | 0.08419100  |
| H  | 2.07366100  | -3.74400800 | -0.75772700 |
| H  | -1.86464500 | -4.28028500 | 0.91273600  |
| Br | 0.38608300  | -6.02554200 | 0.09602900  |
| H  | 0.54004700  | 0.66341300  | -1.67242500 |



## base-catalysed oxa-Michael cyclisation (*E*-alkene)

### 10a-alkoxide

$E(\text{wb97xd}/6\text{-311}++\text{G}(3\text{df},3\text{pd})/\text{SMD}(\text{THF})) = -769.4970173$

Thermal correction to Enthalpy ( $\text{wb97xd}/6\text{-311}+\text{G}(\text{d},\text{p})/\text{SMD}(\text{THF})) = 0.290949$

-1 1

|   |             |             |             |
|---|-------------|-------------|-------------|
| C | -0.34026000 | -1.33221700 | 0.01756000  |
| C | -0.60492000 | -0.63980900 | -1.31800900 |
| C | -0.34877900 | -1.47428000 | -2.61176200 |
| C | -0.76951800 | -0.48524800 | 1.21052100  |
| H | -1.65681000 | -0.33133800 | -1.36825700 |
| H | -0.87476700 | -2.29079600 | 0.04278300  |
| H | 0.72535300  | -1.57019300 | 0.10902400  |
| H | -1.83773500 | -0.24056800 | 1.13343300  |
| H | -0.25879900 | 0.48726300  | 1.18238200  |
| H | -0.91159300 | -2.43443200 | -2.44211600 |
| O | -0.72782700 | -0.81674800 | -3.72233600 |
| C | -0.54099800 | -1.07177500 | 2.56490400  |
| H | -0.86149000 | -0.46388600 | 3.40958600  |
| C | 0.01202100  | -2.25670300 | 2.83100500  |
| H | 0.36016000  | -2.92282500 | 2.05000200  |
| C | 0.17784100  | -2.72003800 | 4.22145600  |
| O | -0.14953700 | -2.12021100 | 5.22146700  |
| O | 0.75498200  | -3.93056800 | 4.25609400  |
| C | 0.97179100  | -4.49585200 | 5.55117900  |
| H | 0.02464700  | -4.63271300 | 6.07672500  |
| H | 1.44452200  | -5.46067200 | 5.37588500  |
| H | 1.62949500  | -3.85911200 | 6.14606700  |
| H | -0.00322700 | 0.27706300  | -1.39021600 |
| C | 3.86350000  | -2.59563600 | -2.61812200 |
| C | 2.92090600  | -3.45325300 | -2.05966000 |
| C | 1.57164900  | -3.10408300 | -2.06126800 |
| C | 1.13377600  | -1.90131700 | -2.61804700 |
| C | 2.09053900  | -1.05824700 | -3.18644300 |
| C | 3.44006500  | -1.39368500 | -3.18348900 |
| H | 4.91522200  | -2.86367800 | -2.62170000 |
| H | 3.23571100  | -4.39789000 | -1.62609700 |
| H | 0.84209200  | -3.78243900 | -1.62492600 |
| H | 1.74366000  | -0.13951000 | -3.64877300 |
| H | 4.16687900  | -0.72114700 | -3.62986100 |

### Transition state 2.1-cis

$E(\text{wb97xd/6-311++G(3df,3pd)/SMD(THF)}) = -769.4903492$

Thermal correction to Enthalpy (wb97xd/6-311+G(d,p)/SMD(THF)) = 0,289828

Imaginary frequency: 63.64i

-1 1

|   |             |             |             |
|---|-------------|-------------|-------------|
| C | -3.60875300 | -0.43002800 | 0.21554200  |
| O | -3.54769100 | -0.64308400 | 1.41279400  |
| C | -2.83338800 | 0.52372200  | -0.55184800 |
| C | -1.82932300 | 1.23024600  | 0.01297300  |
| C | -1.14964100 | 2.37523200  | -0.67315700 |
| H | -0.99392500 | 2.12711900  | -1.72842000 |
| H | -1.86212700 | 3.21311300  | -0.65673500 |
| H | -3.04780000 | 0.59915200  | -1.61299300 |
| H | -1.67558100 | 1.13097600  | 1.08210600  |
| C | 0.15928700  | 2.85743600  | -0.04228900 |
| H | 0.00333000  | 2.99861900  | 1.03639800  |
| C | 1.36909200  | 1.95185400  | -0.25970300 |
| H | 1.52896500  | 1.80331300  | -1.33718700 |
| H | 2.26250400  | 2.45469500  | 0.13479100  |
| C | 1.19439000  | 0.55748600  | 0.39173700  |
| H | 1.13653800  | 0.76033800  | 1.49599800  |
| O | 0.10642100  | -0.08896200 | -0.07941400 |
| H | 0.38336700  | 3.85055000  | -0.44944900 |
| O | -4.48741900 | -1.10226200 | -0.57430100 |
| C | -5.31035600 | -2.06359600 | 0.07676300  |
| H | -5.93807200 | -1.59556100 | 0.83925300  |
| H | -5.93757400 | -2.49539700 | -0.70288100 |
| H | -4.70797500 | -2.84734900 | 0.54222700  |
| C | 2.50991700  | -0.21941000 | 0.21222300  |
| C | 3.67587200  | 0.13473400  | 0.89744500  |
| C | 2.56563200  | -1.29705200 | -0.66862700 |
| C | 4.86512400  | -0.55918200 | 0.70028600  |
| H | 3.64951700  | 0.96387500  | 1.60091100  |
| C | 3.75373800  | -1.99489500 | -0.87505800 |
| H | 1.64679200  | -1.57320900 | -1.17534000 |
| C | 4.90981800  | -1.62888600 | -0.19217500 |
| H | 5.75834800  | -0.27017300 | 1.24596300  |
| H | 3.77669300  | -2.83193900 | -1.56675900 |
| H | 5.83535600  | -2.17414800 | -0.34702400 |

### Transition state 2.1-trans

$E(\text{wb97xd/6-311++G(3df,3pd)/SMD(THF)}) = -769.4913589$

Thermal correction to Enthalpy (wb97xd/6-311+G(d,p)/SMD(THF)) = 0.290401

Imaginary frequency: 97.14i

-1 1

|   |             |             |             |
|---|-------------|-------------|-------------|
| C | 3.23329100  | -0.62314500 | 0.18457500  |
| O | 3.46518800  | -0.97367400 | 1.32610500  |
| C | 2.50313200  | 0.55590200  | -0.24882300 |
| C | 1.90183100  | 1.37572500  | 0.64038800  |
| C | 1.26768500  | 2.68787200  | 0.27256900  |
| H | 0.74178900  | 3.08060300  | 1.14484900  |
| H | 2.07965100  | 3.39251700  | 0.04126900  |
| H | 2.42385000  | 0.71160400  | -1.31875900 |
| H | 2.05011700  | 1.17640800  | 1.69394400  |
| C | 0.30447400  | 2.63940800  | -0.92015800 |
| H | 0.79888300  | 2.15530500  | -1.77104400 |
| C | -1.02330900 | 1.93459700  | -0.63614600 |
| H | -1.61208900 | 2.52913900  | 0.07620300  |
| H | -1.59695100 | 1.88453400  | -1.57127800 |
| C | -0.84722900 | 0.52577500  | -0.00405200 |
| H | -0.22408800 | -0.05293200 | -0.74113700 |
| O | -0.27596800 | 0.59126300  | 1.21411100  |
| H | 0.10097700  | 3.66899500  | -1.23762900 |
| C | -2.20791300 | -0.19106000 | -0.01670000 |
| C | -2.85278400 | -0.47822900 | 1.18404100  |
| C | -2.83479500 | -0.56824900 | -1.20847100 |
| C | -4.09301000 | -1.11352600 | 1.20050300  |
| H | -2.34343600 | -0.19606100 | 2.09953300  |
| C | -4.07139500 | -1.20441600 | -1.20117500 |
| H | -2.34148400 | -0.36821600 | -2.15688800 |
| C | -4.70940000 | -1.47851200 | 0.00777500  |
| H | -4.57839400 | -1.32874700 | 2.14800700  |
| H | -4.53818100 | -1.49266900 | -2.13831500 |
| H | -5.67336900 | -1.97710600 | 0.01722800  |
| O | 3.67831600  | -1.34146500 | -0.87799300 |
| C | 4.41373300  | -2.52266600 | -0.57666700 |
| H | 4.67914600  | -2.96119900 | -1.53826700 |
| H | 5.32062400  | -2.28988800 | -0.01324100 |
| H | 3.80752900  | -3.22798700 | -0.00347900 |

**enolate 2.2-cis**

$E(\text{wb97xd}/6\text{-}311\text{++G}(3\text{df},3\text{pd})/\text{SMD}(\text{THF})) = -769.5147312$

Thermal correction to Enthalpy ( $\text{wb97xd}/6\text{-}311\text{+G}(\text{d,p})/\text{SMD}(\text{THF})) = 0.292495$

-1 1

|   |             |             |             |
|---|-------------|-------------|-------------|
| C | -3.28795700 | -0.75326000 | -0.48161800 |
| O | -4.19404100 | -1.35148300 | -1.09620200 |
| C | -2.49535400 | 0.30195300  | -0.91391500 |
| C | -1.40991400 | 0.92213500  | -0.12709200 |
| C | -1.23962500 | 2.41872900  | -0.40409000 |
| H | -1.06945400 | 2.55440400  | -1.48010300 |
| H | -2.17490100 | 2.92994300  | -0.15658300 |
| H | -2.63390900 | 0.61947300  | -1.94434900 |
| H | -1.59865200 | 0.78060700  | 0.94707500  |
| C | -0.07896600 | 3.02253500  | 0.38645700  |
| H | -0.33025500 | 3.01480100  | 1.45533600  |
| C | 1.19721100  | 2.21431600  | 0.16943600  |
| H | 1.54538500  | 2.32425200  | -0.86502100 |
| H | 2.00005600  | 2.56235500  | 0.82748800  |
| C | 0.92390300  | 0.72634500  | 0.42423700  |
| H | 0.63804100  | 0.60965500  | 1.48479300  |
| O | -0.12416100 | 0.26262800  | -0.39225300 |
| H | 0.07905900  | 4.06909800  | 0.10592700  |
| O | -3.01541800 | -1.16099200 | 0.83430000  |
| C | -3.83419700 | -2.18653700 | 1.34640300  |
| H | -3.74900700 | -3.11168600 | 0.76675800  |
| H | -3.48681100 | -2.37131400 | 2.36603200  |
| H | -4.89062800 | -1.89782900 | 1.37552400  |
| C | 2.16048100  | -0.10769900 | 0.17660600  |
| C | 3.19939900  | -0.09893300 | 1.10952500  |
| C | 2.31170300  | -0.85507500 | -0.98964100 |
| C | 4.36809600  | -0.81556300 | 0.88031900  |
| H | 3.08893700  | 0.47202900  | 2.02729600  |
| C | 3.48088200  | -1.57519400 | -1.22052000 |
| H | 1.50116700  | -0.87540800 | -1.70814700 |
| C | 4.51397000  | -1.55630300 | -0.28973000 |
| H | 5.16415200  | -0.80032500 | 1.61764600  |
| H | 3.58248000  | -2.15544200 | -2.13194900 |
| H | 5.42373900  | -2.11913700 | -0.47009200 |

**enolate 2.2-trans** $E(\text{wb97xd}/6\text{-}311\text{++G}(3\text{df},3\text{pd})/\text{SMD}(\text{THF})) = -769.5137112$ 

Thermal correction to Enthalpy (wb97xd/6-311+G(d,p)/SMD(THF)) = 0.292761

-1 1

|   |             |             |             |
|---|-------------|-------------|-------------|
| C | 2.97781500  | -0.75259100 | 0.19503400  |
| O | 3.11565900  | -1.22409200 | 1.33939900  |
| C | 2.18650400  | 0.29994300  | -0.24453000 |
| C | 1.31210500  | 1.04843500  | 0.68928200  |
| C | 1.15792200  | 2.53992500  | 0.35860300  |
| H | 0.65837900  | 3.03801000  | 1.19920900  |
| H | 2.14751800  | 2.99263200  | 0.24760600  |
| H | 2.21322400  | 0.55465900  | -1.29837900 |
| H | 1.70023000  | 0.93599900  | 1.70401100  |
| C | 0.32037700  | 2.74907700  | -0.90429000 |
| H | 0.85729100  | 2.35737600  | -1.77615200 |
| C | -1.02295800 | 2.03170000  | -0.77046500 |
| H | -1.63515400 | 2.52268200  | -0.00298900 |
| H | -1.58243200 | 2.06699400  | -1.71103900 |
| C | -0.80699500 | 0.57109400  | -0.34673700 |
| H | -0.25919600 | 0.05601300  | -1.15193000 |
| O | -0.05411400 | 0.50752200  | 0.83744100  |
| H | 0.16201800  | 3.81724700  | -1.08584100 |
| C | -2.12341500 | -0.14393100 | -0.14576700 |
| C | -2.62064100 | -0.41609300 | 1.12718300  |
| C | -2.88455900 | -0.51464300 | -1.25667000 |
| C | -3.85473800 | -1.04152400 | 1.28664700  |
| H | -2.02608200 | -0.14363700 | 1.99075700  |
| C | -4.11723600 | -1.13720200 | -1.10042200 |
| H | -2.50223100 | -0.32015400 | -2.25483000 |
| C | -4.60872700 | -1.40244800 | 0.17537800  |
| H | -4.22564100 | -1.25061600 | 2.28496500  |
| H | -4.69239100 | -1.42269200 | -1.97522900 |
| H | -5.56853000 | -1.89253700 | 0.30035000  |
| O | 3.73017800  | -1.33107000 | -0.84662200 |
| C | 4.59160700  | -2.38142900 | -0.47418200 |
| H | 5.08146700  | -2.71347400 | -1.39302200 |
| H | 5.35663000  | -2.05667000 | 0.24004000  |
| H | 4.05003600  | -3.22510900 | -0.03293200 |

### Transition state 3.1-cis

$E(\text{wb97xd/6-311++G(3df,3pd)/SMD(THF)}) = -769.4899223$

Thermal correction to Enthalpy (wb97xd/6-311+G(d,p)/SMD(THF)) = 0.290169

Imaginary frequency: 56.65i

-1 1

|   |             |             |             |
|---|-------------|-------------|-------------|
| C | -3.64604000 | -0.61022500 | -0.41902800 |
| O | -4.41071900 | -1.24153800 | -1.13396000 |
| C | -2.84510200 | 0.51172400  | -0.85123600 |
| C | -1.91716000 | 1.13530600  | -0.08168500 |
| C | -1.27485300 | 2.42581900  | -0.49470600 |
| H | -1.04370300 | 2.38996900  | -1.56493200 |
| H | -2.03794500 | 3.20796900  | -0.37108700 |
| H | -2.97094100 | 0.78083500  | -1.89567100 |
| H | -1.85076300 | 0.86913600  | 0.96647600  |
| C | -0.03569600 | 2.84337200  | 0.30037500  |
| H | -0.26894200 | 2.79773800  | 1.37347100  |
| C | 1.22091500  | 2.02193600  | 0.02526000  |
| H | 1.46005200  | 2.06237200  | -1.04688300 |
| H | 2.06575700  | 2.47018300  | 0.56491100  |
| C | 1.04720600  | 0.53537900  | 0.41886100  |
| H | 0.90895600  | 0.54352800  | 1.53356800  |
| O | 0.00905400  | -0.04033300 | -0.23130600 |
| H | 0.17078000  | 3.89686600  | 0.07788300  |
| O | -3.50547100 | -0.91871700 | 0.89307800  |
| C | -4.24358200 | -2.04067000 | 1.35943900  |
| H | -3.96108400 | -2.95012400 | 0.82356800  |
| H | -3.99129000 | -2.14368000 | 2.41472200  |
| H | -5.31954500 | -1.88210200 | 1.25081200  |
| C | 2.38700600  | -0.18390200 | 0.19825400  |
| C | 3.50757500  | 0.08396400  | 0.99022900  |
| C | 2.51285000  | -1.11725200 | -0.82790300 |
| C | 4.72142700  | -0.55360500 | 0.75662700  |
| H | 3.42582500  | 0.79812200  | 1.80637300  |
| C | 3.72602600  | -1.75814200 | -1.07000800 |
| H | 1.62739100  | -1.32853400 | -1.41848200 |
| C | 4.83706000  | -1.47758800 | -0.28047800 |
| H | 5.57889200  | -0.33379400 | 1.38551900  |
| H | 3.80416900  | -2.48222600 | -1.87565300 |
| H | 5.78240900  | -1.97778600 | -0.46473100 |

### Transition state 3.1-trans

$E(\text{wb97xd/6-311++G(3df,3pd)/SMD(THF)}) = -769.490731$

Thermal correction to Enthalpy (wb97xd/6-311+G(d,p)/SMD(THF)) = 0.290558

Imaginary frequency: 78.11i

-1 1

|   |             |             |             |
|---|-------------|-------------|-------------|
| C | -3.21479500 | -0.62182500 | 0.60357800  |
| O | -3.62596100 | -1.11838700 | 1.64188500  |
| C | -2.46945600 | 0.61535000  | 0.51894200  |
| C | -1.94141200 | 1.12240600  | -0.62594700 |
| C | -1.34883900 | 2.50416300  | -0.70692800 |
| H | -0.91855600 | 2.64653400  | -1.70058000 |
| H | -2.17267400 | 3.22516700  | -0.60607500 |
| H | -2.30254000 | 1.09431000  | 1.47771500  |
| H | -2.18971500 | 0.64265600  | -1.56238900 |
| C | -0.28665000 | 2.81897600  | 0.35329300  |
| H | -0.69212400 | 2.61537600  | 1.35168100  |
| C | 1.02345500  | 2.05224400  | 0.17094900  |
| H | 1.53247500  | 2.40049600  | -0.73865500 |
| H | 1.68400400  | 2.27373000  | 1.01962200  |
| C | 0.80821200  | 0.52296400  | 0.01187800  |
| H | 0.29218500  | 0.19407000  | 0.95292600  |
| O | 0.08760800  | 0.23194700  | -1.09362700 |
| H | -0.08091500 | 3.89550700  | 0.32571900  |
| C | 2.17655600  | -0.16863300 | 0.05541500  |
| C | 2.70559200  | -0.74313800 | -1.09799700 |
| C | 2.93300200  | -0.22798600 | 1.22970600  |
| C | 3.95934400  | -1.35130200 | -1.08711100 |
| H | 2.09869900  | -0.70860300 | -1.99649500 |
| C | 4.18390500  | -0.83521800 | 1.24957500  |
| H | 2.53055700  | 0.20094900  | 2.14444700  |
| C | 4.70553100  | -1.39897600 | 0.08625800  |
| H | 4.35379900  | -1.79390300 | -1.99709200 |
| H | 4.75222200  | -0.87534600 | 2.17391600  |
| H | 5.68022100  | -1.87611300 | 0.09870300  |
| O | -3.45815800 | -1.20780700 | -0.59238500 |
| C | -4.17295400 | -2.43659600 | -0.56018800 |
| H | -4.26218500 | -2.75436200 | -1.59884700 |
| H | -3.63113900 | -3.19419700 | 0.01110400  |
| H | -5.16785700 | -2.30578500 | -0.12709100 |

### Chelated transition state 3.2-cis

$E(\text{wb97xd/6-311++G(3df,3pd)/SMD(THF)}) = -1369.394217$

Thermal correction to Enthalpy (wb97xd/6-311+G(d,p)/SMD(THF)) = 0,293018

Imaginary frequency: 107.89i

0 1

|   |             |             |             |
|---|-------------|-------------|-------------|
| C | -3.36204600 | -0.18113900 | -0.00779100 |
| O | -3.02540500 | -0.85613400 | 0.96845600  |
| C | -2.66611300 | 0.94821200  | -0.54918300 |
| C | -1.60646400 | 1.51596600  | 0.10211700  |
| C | -1.01327400 | 2.81422000  | -0.35845700 |
| H | -0.92117500 | 2.79633200  | -1.44949400 |
| H | -1.74927900 | 3.59509900  | -0.12306200 |
| H | -2.98251600 | 1.31413700  | -1.51975200 |
| H | -1.44075000 | 1.24579700  | 1.14073400  |
| C | 0.32095400  | 3.20417000  | 0.28041700  |
| H | 0.20737900  | 3.20385800  | 1.37301300  |
| C | 1.50094100  | 2.31297400  | -0.09925600 |
| H | 1.64994600  | 2.32937800  | -1.18690900 |
| H | 2.41444800  | 2.70588000  | 0.36334800  |
| C | 1.27049400  | 0.85316200  | 0.32724100  |
| H | 1.16483300  | 0.87895900  | 1.43931900  |
| O | 0.15224500  | 0.33084200  | -0.27505600 |
| H | 0.54503200  | 4.23794300  | -0.00372100 |
| O | -4.47887000 | -0.48836200 | -0.70081900 |
| C | -5.22311200 | -1.61783300 | -0.25048400 |
| H | -5.58810700 | -1.46798600 | 0.76780600  |
| H | -6.06527200 | -1.70736600 | -0.93536300 |
| H | -4.61956200 | -2.52793700 | -0.28621400 |
| C | 2.52316500  | 0.01746800  | 0.05906900  |
| C | 3.64534400  | 0.11208400  | 0.88623800  |
| C | 2.57063100  | -0.85563900 | -1.02646800 |
| C | 4.78681000  | -0.63972000 | 0.63185700  |
| H | 3.62164600  | 0.78125700  | 1.74264700  |
| C | 3.71238400  | -1.61060400 | -1.28711500 |
| H | 1.69578700  | -0.92781900 | -1.66435200 |
| C | 4.82459200  | -1.50620600 | -0.45867300 |
| H | 5.64762600  | -0.55505300 | 1.28747300  |
| H | 3.73301600  | -2.28205700 | -2.13988000 |
| H | 5.71361800  | -2.09521300 | -0.65795600 |
| K | -0.60584300 | -1.84633500 | 0.65423000  |



### Chelated transition state 3.2-trans

$E(\text{wb97xd/6-311++G(3df,3pd)/SMD(THF)}) = -1369.395348$

Thermal correction to Enthalpy (wb97xd/6-311+G(d,p)/SMD(THF)) = 0.293633

Imaginary frequency: 147.45i

0 1

|   |             |             |             |
|---|-------------|-------------|-------------|
| C | -2.98862400 | -0.32212700 | 0.33579600  |
| O | -2.94103500 | -1.17562600 | -0.55348400 |
| C | -2.35050500 | 0.96134900  | 0.32455700  |
| C | -1.69776200 | 1.40797200  | -0.79273900 |
| C | -1.12393400 | 2.79483200  | -0.89747800 |
| H | -0.63335100 | 2.90274300  | -1.86766700 |
| H | -1.96135800 | 3.50457800  | -0.87967600 |
| H | -2.34503600 | 1.52348900  | 1.25060900  |
| H | -1.90629200 | 0.90748100  | -1.73095900 |
| C | -0.13448600 | 3.16014700  | 0.21548900  |
| H | -0.61544900 | 3.03131400  | 1.19225800  |
| C | 1.16194800  | 2.35026100  | 0.17759900  |
| H | 1.73349000  | 2.60057800  | -0.72595100 |
| H | 1.78044100  | 2.62068100  | 1.04196000  |
| C | 0.90070200  | 0.82990300  | 0.15417500  |
| H | 0.30983500  | 0.60302500  | 1.07205600  |
| O | 0.21445500  | 0.46432900  | -0.97442700 |
| H | 0.10221300  | 4.22613300  | 0.13028200  |
| C | 2.21440700  | 0.06872400  | 0.31219600  |
| C | 2.85090700  | -0.48892600 | -0.79595600 |
| C | 2.81670200  | -0.07450700 | 1.56461800  |
| C | 4.05878700  | -1.16979600 | -0.66036800 |
| H | 2.38576800  | -0.37451600 | -1.76973700 |
| C | 4.02216100  | -0.75263900 | 1.70660000  |
| H | 2.33004000  | 0.34740200  | 2.44029900  |
| C | 4.64893800  | -1.30529000 | 0.59184500  |
| H | 4.54103300  | -1.59462800 | -1.53528100 |
| H | 4.47162900  | -0.85690100 | 2.68900500  |
| H | 5.58800300  | -1.83754500 | 0.70064600  |
| O | -3.67758800 | -0.55521500 | 1.47228200  |
| C | -4.31896700 | -1.82342600 | 1.58466900  |
| H | -4.79823000 | -1.82552800 | 2.56279800  |
| H | -5.07098200 | -1.95452100 | 0.80362300  |
| H | -3.59315800 | -2.63796900 | 1.52664100  |
| K | -0.58956000 | -1.80497500 | -1.53970800 |

## base-catalysed oxa-Michael cyclisation (Z-alkene)

### Transition state 5.1-cis

$E(\text{wb97xd/6-311++G(3df,3pd)/SMD(THF)}) = -769.488223$

Thermal correction to Enthalpy (wb97xd/6-311+G(d,p)/SMD(THF)) = 0.290369

Imaginary frequency: 76.15i

-1 1

|   |             |             |             |
|---|-------------|-------------|-------------|
| C | -2.68657200 | 0.09008900  | 1.04585900  |
| C | -1.64678400 | 0.94494200  | 0.83430300  |
| C | -1.44073700 | 1.80720400  | -0.37499100 |
| H | -1.54730000 | 1.20157700  | -1.27651900 |
| H | -2.26876000 | 2.52980100  | -0.40347300 |
| H | -1.08332500 | 1.23495700  | 1.71541400  |
| C | -0.11589500 | 2.57307400  | -0.39074000 |
| H | 0.00133400  | 3.11101500  | 0.56075800  |
| C | 1.12225300  | 1.71205500  | -0.63454100 |
| H | 1.04367700  | 1.22231200  | -1.61511900 |
| H | 2.00706700  | 2.36165700  | -0.66444900 |
| C | 1.28830100  | 0.60287300  | 0.43277200  |
| H | 1.41869500  | 1.15190100  | 1.40482000  |
| O | 0.22854200  | -0.24009300 | 0.45262400  |
| H | -0.17348600 | 3.34202600  | -1.17015700 |
| C | 2.63300700  | -0.10413800 | 0.20672600  |
| C | 3.85242300  | 0.55084100  | 0.40436300  |
| C | 2.65904700  | -1.43027500 | -0.21837700 |
| C | 5.06159600  | -0.09588100 | 0.17254100  |
| H | 3.85477000  | 1.58177200  | 0.75050300  |
| C | 3.86637500  | -2.08445100 | -0.45509100 |
| H | 1.70522600  | -1.93083300 | -0.34776900 |
| C | 5.07355600  | -1.42028500 | -0.26209300 |
| H | 5.99735600  | 0.43045500  | 0.33484200  |
| H | 3.86493400  | -3.11852100 | -0.78699100 |
| H | 6.01533200  | -1.92861100 | -0.44232100 |
| H | -2.78827600 | -0.38243700 | 2.01620400  |
| C | -3.62717500 | -0.33666800 | 0.03727000  |
| O | -3.71536700 | 0.02949000  | -1.12324100 |
| O | -4.49923000 | -1.25600400 | 0.54284200  |
| C | -5.48843000 | -1.74228700 | -0.35493100 |
| H | -5.03335900 | -2.24612800 | -1.21130400 |
| H | -6.08442300 | -2.45441000 | 0.21585200  |
| H | -6.12802300 | -0.93332200 | -0.71736600 |

### Transition state 5.1-trans

$E(\text{wb97xd/6-311++G(3df,3pd)/SMD(THF)}) = -769.486191$

Thermal correction to Enthalpy (wb97xd/6-311+G(d,p)/SMD(THF)) = 0.290789

Imaginary frequency: 94.97i

-1 1

|   |             |             |             |
|---|-------------|-------------|-------------|
| C | -2.37706100 | -1.81886900 | 0.95791500  |
| C | -0.84458200 | -1.93353200 | 1.14556800  |
| C | -0.75531600 | 0.95248600  | 0.81427700  |
| C | -2.25013100 | 0.76245900  | 0.76514700  |
| C | -2.76750300 | -0.56282400 | 0.18437900  |
| H | -0.41203400 | -1.89882300 | 0.11008700  |
| H | -2.41969600 | -0.65020400 | -0.84753700 |
| H | -2.82593400 | -1.81300700 | 1.96108100  |
| H | -2.67182300 | 1.57657600  | 0.16205700  |
| H | -2.63722300 | 0.87621100  | 1.78203600  |
| H | -3.86143500 | -0.49320200 | 0.13773000  |
| H | -2.77765000 | -2.69151700 | 0.42502800  |
| O | -0.37114500 | -0.93407200 | 1.92578300  |
| C | -0.50456800 | -3.33525200 | 1.66600500  |
| C | -0.03564600 | -3.50825300 | 2.96631600  |
| C | -0.66581800 | -4.47025600 | 0.86535800  |
| C | 0.25328800  | -4.77834900 | 3.46202900  |
| H | 0.10442500  | -2.61835500 | 3.57090000  |
| C | -0.37739400 | -5.74044300 | 1.35181500  |
| H | -1.01651300 | -4.35469600 | -0.15747200 |
| C | 0.08258600  | -5.90069700 | 2.65796600  |
| H | 0.61757400  | -4.89188900 | 4.47881300  |
| H | -0.50597500 | -6.60784400 | 0.71141700  |
| H | 0.31051800  | -6.89047700 | 3.04029300  |
| H | -0.36538400 | 1.27704600  | 1.76842200  |
| C | 0.09353000  | 1.08920300  | -0.24845800 |
| C | -0.23461100 | 0.96739200  | -1.64854400 |
| H | 1.13695900  | 1.30037800  | -0.04115300 |
| O | 0.89178600  | 1.05033200  | -2.41548200 |
| O | -1.33057900 | 0.85200800  | -2.17370200 |
| C | 0.69765100  | 0.99810200  | -3.82237600 |
| H | 0.07375700  | 1.82621000  | -4.16858100 |
| H | 1.69134400  | 1.07758500  | -4.26332400 |
| H | 0.23564400  | 0.05485200  | -4.12448500 |

## Validation of the computational method and the use of enthalpy in computed selectivities

Considering that both modes of activation result in kinetically-controlled cyclisation, transition states leading to the THP products were required in order to decipher the origin of stereoselection. We started the transition state location using  $\omega$ B97X-D density functional in conjunction with the 6-311+G(d,p) basis-set. After experimenting different approaches towards locating the transition states, the required transition states were obtained. It is important to point out that transition state could not be located in vacuum but with the use of solvation model. In addition, the obtained imaginary frequencies were rather low (freq(**2.1-trans**): 84.2i cm<sup>-1</sup>, freq(**2.1-cis** TS): 69.6i cm<sup>-1</sup>). This implies that the PES is rather flat around the transition states.<sup>1</sup> In addition to several factors, the flat curvature of the PES also results in severe uncertainty in the calculation of entropy. Moreover, we find that for the acid catalysed reactions, the computed selectivities using the Gibbs free energies are in qualitative agreement with those obtained experimentally. However, the computed selectivities for the base catalysed reactions using the Gibbs free energies results in selectivities opposite to that obtained experimentally. For these reasons, we use the enthalpy rather than Gibbs free energy to compute the selectivities. It should also be noted that we are comparing intramolecular cyclizations featuring very little structural differences. Therefore, the net effect of entropy is posited in all the cases to be very similar.

To validate the applied theoretical method, we tested various density functionals to examine the functional-dependence of the predicted selectivity (Table 1). In line with the experimental results, all the tested functionals favour TS **2.1-trans** when using the electronic energy ( $E_0'$ ), which was computed with the larger 6-311++G(3df,3pd) basis-set. This trend did not change when the electronic energies ( $E_0'$ ) were corrected with ZPEs adapted from  $\omega$ B97X-D/6-311+G(d,p) calculations. Besides, the Gibbs free energies and the enthalpies were calculated by using the electronic energies obtained with different functionals (and using 6-311++G(3df,3pd) basis-set) and the corresponding thermal corrections adapted from  $\omega$ B97X-D/6-311+G(d,p) calculations. With all the functionals, the trend in selectivity when using enthalpy of activation or energies of activation, remains qualitatively the same. But, the use of free-energies of activation results in qualitatively different selectivities. This once again confirms the perils of using free-energies with a large uncertainty involved in the computation of entropy.

In the case of the acid-catalysed cyclisation, the curvature of the potential energy surface at the TS is certainly more pronounced inasmuch as the imaginary frequencies noticeably increased (freq(**1.1-cis**): 215.1i cm<sup>-1</sup>, freq(**1.1-trans**): 233.5i cm<sup>-1</sup>). We performed the same density functional test as with the TSs of the base-catalysed reaction (Table 2). All the tested functionals favour the TS **1.1-cis**, which results in the experimentally observed major isomer, with respect to all energy and thermodynamic terms listed in Table 2.

Overall, the similar results (same trend in selectivity when using enthalpies or energies) obtained with different density functions in Table 1 convinced us that the level of theory we used in the main text is adequate.

---

<sup>1</sup> Jensen, F. *Introduction to Computational Chemistry*, John Wiley & sons, 2017.

**Table 1 Base-catalysed cyclisation: single point energies computed with 6-311++G(3df,3pd) basis-set using various functionals and the respective Gibbs free energies and enthalpies calculated by the corrections adapted from  $\omega$ B97X-D/6-311+G(d,p) calculations.**

| TS        | Eo'(THF) / Hartrees            | dEo' (kcal) | Eo'(THF)+ZPE / Hartrees                                      | d[Eo'+ZPE] (kcal) | G / Hartrees                                                   | dG (kcal) | H / Hartrees                                                   | dH (kcal) |
|-----------|--------------------------------|-------------|--------------------------------------------------------------|-------------------|----------------------------------------------------------------|-----------|----------------------------------------------------------------|-----------|
| 2.1-cis   | wB97XD/6-311++G(3df,3pd)       |             | Eo'(wB97XD/6-311++G(3df,3pd))+ZPE(wB97XD/6-311+G(d,p))       |                   | Eo'(wB97XD/6-311++G(3df,3pd))+Gcorr(wB97XD/6-311+G(d,p))       |           | Eo'(wB97XD/6-311++G(3df,3pd))+Hcorr(wB97XD/6-311+G(d,p))       |           |
| 2.1-cis   | -769.490349                    | 0.6         | -769.208783                                                  | 0.1               | -769.234656                                                    | -0.3      | -769.200521                                                    | 0.3       |
| 2.1-trans | -769.491359                    | 0.0         | -769.209014                                                  | 0.0               | -769.234208                                                    | 0.0       | -769.200958                                                    | 0.0       |
| 2.1-cis   | m062x/6-311++G(3df,3pd)        | 1.0         | Eo'(m062x/6-311++G(3df,3pd))+ZPE(wB97XD/6-311+G(d,p))        | 0.5               | Eo'(m062x/6-311++G(3df,3pd))+Gcorr(wB97XD/6-311+G(d,p))        | 0.1       | Eo'(m062x/6-311++G(3df,3pd))+Hcorr(wB97XD/6-311+G(d,p))        | 0.6       |
| 2.1-cis   | -769.419641                    | 1.0         | -769.138075                                                  | 0.5               | -769.163948                                                    | 0.1       | -769.129813                                                    | 0.6       |
| 2.1-trans | -769.421216                    | 0.0         | -769.138871                                                  | 0.0               | -769.164065                                                    | 0.0       | -769.130815                                                    | 0.0       |
| 2.1-cis   | m062x-D3/6-311++G(3df,3pd)     | 1.1         | Eo'(m062x-D3/6-311++G(3df,3pd))+ZPE(wB97XD/6-311+G(d,p))     | 0.6               | Eo'(m062x-D3/6-311++G(3df,3pd))+Gcorr(wB97XD/6-311+G(d,p))     | 0.1       | Eo'(m062x-D3/6-311++G(3df,3pd))+Hcorr(wB97XD/6-311+G(d,p))     | 0.7       |
| 2.1-cis   | -769.421336                    | 1.1         | -769.139770                                                  | 0.6               | -769.165643                                                    | 0.1       | -769.131508                                                    | 0.7       |
| 2.1-trans | -769.423020                    | 0.0         | -769.140675                                                  | 0.0               | -769.165869                                                    | 0.0       | -769.132619                                                    | 0.0       |
| 2.1-cis   | m06L/6-311++G(3df,3pd)         | 0.8         | Eo'(m06L/6-311++G(3df,3pd))+ZPE(wB97XD/6-311+G(d,p))         | 0.3               | Eo'(m06L/6-311++G(3df,3pd))+Gcorr(wB97XD/6-311+G(d,p))         | -0.1      | Eo'(m06L/6-311++G(3df,3pd))+Hcorr(wB97XD/6-311+G(d,p))         | 0.4       |
| 2.1-cis   | -769.638117                    | 0.8         | -769.356551                                                  | 0.3               | -769.382424                                                    | -0.1      | -769.348289                                                    | 0.4       |
| 2.1-trans | -769.639368                    | 0.0         | -769.357023                                                  | 0.0               | -769.382217                                                    | 0.0       | -769.348967                                                    | 0.0       |
| 2.1-cis   | m06L-D3/6-311++G(3df,3pd)      | 0.9         | Eo'(m06L-D3/6-311++G(3df,3pd))+ZPE(wB97XD/6-311+G(d,p))      | 0.4               | Eo'(m06L-D3/6-311++G(3df,3pd))+Gcorr(wB97XD/6-311+G(d,p))      | -0.1      | Eo'(m06L-D3/6-311++G(3df,3pd))+Hcorr(wB97XD/6-311+G(d,p))      | 0.5       |
| 2.1-cis   | -769.640045                    | 0.9         | -769.358479                                                  | 0.4               | -769.384352                                                    | -0.1      | -769.350217                                                    | 0.5       |
| 2.1-trans | -769.641420                    | 0.0         | -769.359075                                                  | 0.0               | -769.384269                                                    | 0.0       | -769.351019                                                    | 0.0       |
| 2.1-cis   | m052x/6-311++G(3df,3pd)        | 0.9         | Eo'(m052x/6-311++G(3df,3pd))+ZPE(wB97XD/6-311+G(d,p))        | 0.4               | Eo'(m052x/6-311++G(3df,3pd))+Gcorr(wB97XD/6-311+G(d,p))        | -0.1      | Eo'(m052x/6-311++G(3df,3pd))+Hcorr(wB97XD/6-311+G(d,p))        | 0.5       |
| 2.1-cis   | -769.659089                    | 0.9         | -769.377523                                                  | 0.4               | -769.403396                                                    | -0.1      | -769.369261                                                    | 0.5       |
| 2.1-trans | -769.660465                    | 0.0         | -769.378120                                                  | 0.0               | -769.403314                                                    | 0.0       | -769.370064                                                    | 0.0       |
| 2.1-cis   | m052x-D3/6-311++G(3df,3pd)     | 1.0         | Eo'(m052x-D3/6-311++G(3df,3pd))+ZPE(wB97XD/6-311+G(d,p))     | 0.5               | Eo'(m052x-D3/6-311++G(3df,3pd))+Gcorr(wB97XD/6-311+G(d,p))     | 0.1       | Eo'(m052x-D3/6-311++G(3df,3pd))+Hcorr(wB97XD/6-311+G(d,p))     | 0.6       |
| 2.1-cis   | -769.662536                    | 1.0         | -769.380970                                                  | 0.5               | -769.406843                                                    | 0.1       | -769.372708                                                    | 0.6       |
| 2.1-trans | -769.664130                    | 0.0         | -769.381785                                                  | 0.0               | -769.406979                                                    | 0.0       | -769.373729                                                    | 0.0       |
| 2.1-cis   | b3lyp-D3B/6-311++G(3df,3pd)    | 0.5         | Eo'(b3lyp-D3B/6-311++G(3df,3pd))+ZPE(wB97XD/6-311+G(d,p))    | 0.0               | Eo'(b3lyp-D3B/6-311++G(3df,3pd))+Gcorr(wB97XD/6-311+G(d,p))    | -0.4      | Eo'(b3lyp-D3B/6-311++G(3df,3pd))+Hcorr(wB97XD/6-311+G(d,p))    | 0.1       |
| 2.1-cis   | -769.818186                    | 0.5         | -769.536620                                                  | 0.0               | -769.562493                                                    | -0.4      | -769.528358                                                    | 0.1       |
| 2.1-trans | -769.818970                    | 0.0         | -769.536625                                                  | 0.0               | -769.561819                                                    | 0.0       | -769.528569                                                    | 0.0       |
| 2.1-cis   | b2lyp-D3/6-311++G(3df,3pd)     | -0.1        | Eo'(b2lyp-D3/6-311++G(3df,3pd))+ZPE(wB97XD/6-311+G(d,p))     | -0.6              | Eo'(b2lyp-D3/6-311++G(3df,3pd))+Gcorr(wB97XD/6-311+G(d,p))     | -1.0      | Eo'(b2lyp-D3/6-311++G(3df,3pd))+Hcorr(wB97XD/6-311+G(d,p))     | -0.4      |
| 2.1-cis   | -768.148492                    | -0.1        | -767.866926                                                  | -0.6              | -767.892799                                                    | -1.0      | -767.858664                                                    | -0.4      |
| 2.1-trans | -768.148365                    | 0.0         | -767.866020                                                  | 0.0               | -767.891214                                                    | 0.0       | -767.857964                                                    | 0.0       |
| 2.1-cis   | B97D/6-311++G(3df,3pd)         | 0.5         | Eo'(B97D/6-311++G(3df,3pd))+ZPE(wB97XD/6-311+G(d,p))         | 0.0               | Eo'(B97D/6-311++G(3df,3pd))+Gcorr(wB97XD/6-311+G(d,p))         | -0.4      | Eo'(B97D/6-311++G(3df,3pd))+Hcorr(wB97XD/6-311+G(d,p))         | 0.1       |
| 2.1-cis   | -769.266603                    | 0.5         | -768.985037                                                  | 0.0               | -769.010910                                                    | -0.4      | -768.976775                                                    | 0.1       |
| 2.1-trans | -769.267396                    | 0.0         | -768.985051                                                  | 0.0               | -769.010245                                                    | 0.0       | -768.976995                                                    | 0.0       |
| 2.1-cis   | B97D-D3/6-311++G(3df,3pd)      | 0.4         | Eo'(B97D-D3/6-311++G(3df,3pd))+ZPE(wB97XD/6-311+G(d,p))      | -0.1              | Eo'(B97D-D3/6-311++G(3df,3pd))+Gcorr(wB97XD/6-311+G(d,p))      | -0.5      | Eo'(B97D-D3/6-311++G(3df,3pd))+Hcorr(wB97XD/6-311+G(d,p))      | 0.0       |
| 2.1-cis   | -769.219695                    | 0.4         | -768.938129                                                  | -0.1              | -768.964002                                                    | -0.5      | -768.929867                                                    | 0.0       |
| 2.1-trans | -769.220312                    | 0.0         | -768.937967                                                  | 0.0               | -768.963161                                                    | 0.0       | -768.929911                                                    | 0.0       |
| 2.1-cis   | TPSSTPSS-D3B/6-311++G(3df,3pd) | 0.8         | Eo'(TPSSTPSS-D3B/6-311++G(3df,3pd))+ZPE(wB97XD/6-311+G(d,p)) | 0.3               | Eo'(TPSSTPSS-D3B/6-311++G(3df,3pd))+Gcorr(wB97XD/6-311+G(d,p)) | -0.1      | Eo'(TPSSTPSS-D3B/6-311++G(3df,3pd))+Hcorr(wB97XD/6-311+G(d,p)) | 0.4       |
| 2.1-cis   | -769.912385                    | 0.8         | -769.630819                                                  | 0.3               | -769.656692                                                    | -0.1      | -769.622557                                                    | 0.4       |
| 2.1-trans | -769.913671                    | 0.0         | -769.631326                                                  | 0.0               | -769.656520                                                    | 0.0       | -769.623270                                                    | 0.0       |
| 2.1-cis   | TPSSTPSS-D3/6-311++G(3df,3pd)  | 0.6         | Eo'(TPSSTPSS-D3/6-311++G(3df,3pd))+ZPE(wB97XD/6-311+G(d,p))  | 0.2               | Eo'(TPSSTPSS-D3/6-311++G(3df,3pd))+Gcorr(wB97XD/6-311+G(d,p))  | -0.3      | Eo'(TPSSTPSS-D3/6-311++G(3df,3pd))+Hcorr(wB97XD/6-311+G(d,p))  | 0.3       |
| 2.1-cis   | -769.891442                    | 0.6         | -769.609876                                                  | 0.2               | -769.635749                                                    | -0.3      | -769.601614                                                    | 0.3       |
| 2.1-trans | -769.892472                    | 0.0         | -769.610127                                                  | 0.0               | -769.635321                                                    | 0.0       | -769.602071                                                    | 0.0       |
| 2.1-cis   | PBE1PBE-D3B/6-311++G(3df,3pd)  | 0.6         | Eo'(PBE1PBE-D3B/6-311++G(3df,3pd))+ZPE(wB97XD/6-311+G(d,p))  | 0.1               | Eo'(PBE1PBE-D3B/6-311++G(3df,3pd))+Gcorr(wB97XD/6-311+G(d,p))  | -0.3      | Eo'(PBE1PBE-D3B/6-311++G(3df,3pd))+Hcorr(wB97XD/6-311+G(d,p))  | 0.2       |
| 2.1-cis   | -768.875746                    | 0.6         | -768.594180                                                  | 0.1               | -768.620053                                                    | -0.3      | -768.585918                                                    | 0.2       |
| 2.1-trans | -768.876660                    | 0.0         | -768.594315                                                  | 0.0               | -768.619509                                                    | 0.0       | -768.586259                                                    | 0.0       |
| 2.1-cis   | PBE1PBE-D3/6-311++G(3df,3pd)   | 0.5         | Eo'(PBE1PBE-D3/6-311++G(3df,3pd))+ZPE(wB97XD/6-311+G(d,p))   | 0.0               | Eo'(PBE1PBE-D3/6-311++G(3df,3pd))+Gcorr(wB97XD/6-311+G(d,p))   | -0.4      | Eo'(PBE1PBE-D3/6-311++G(3df,3pd))+Hcorr(wB97XD/6-311+G(d,p))   | 0.1       |
| 2.1-cis   | -768.862465                    | 0.5         | -768.580899                                                  | 0.0               | -768.606772                                                    | -0.4      | -768.572637                                                    | 0.1       |
| 2.1-trans | -768.863242                    | 0.0         | -768.580897                                                  | 0.0               | -768.606091                                                    | 0.0       | -768.572841                                                    | 0.0       |

ZPE(2.1-cis)= 0.281488; ZPE(2.1-trans)= 0.282284  
 Gcorr(2.1-cis)= 0.255693; Gcorr(2.1-trans)= 0.257151  
 Hcorr(2.1-cis)= 0.289828; Hcorr(2.1-trans)= 0.290401

**Table 2 Acid-catalysed cyclisation: single point energies computed with 6-311++G(3df,3pd) basis-set using various functionals and the respective Gibbs free energies and enthalpies calculated by the corrections adapted from  $\omega$ B97X-D/6-311+G(d,p) calculations.**

| TS        | Eo'(MeOH) / Hartrees            | dEo' (kcal) | Eo'(THF)+ZPE / Hartrees                                       | d[Eo'+ZPE] (kcal) | G / Hartrees                                                    | dG (kcal) | H / Hartrees                                                    | dH (kcal) |
|-----------|---------------------------------|-------------|---------------------------------------------------------------|-------------------|-----------------------------------------------------------------|-----------|-----------------------------------------------------------------|-----------|
|           | wB97XD/6-311++G(3df,3pd)        |             | Eo'(wB97XD/6-311++G(3df,3pd))+ZPE(wB97XD/6-311+G(d,p))        |                   | Eo'(wB97XD/6-311++G(3df,3pd))+Gcorr(wB97XD/6-311+G(d,p))        |           | Eo'(wB97XD/6-311++G(3df,3pd))+Hcorr(wB97XD/6-311+G(d,p))        |           |
| 1.1-cis   | -3460.527746                    | -0.7        | -3460.178588                                                  | -0.7              | -3460.129480                                                    | -0.4      | -3460.158305                                                    | -0.7      |
| 1.1-trans | -3460.526603                    | 0.0         | -3460.177524                                                  | 0.0               | -3460.228866                                                    | 0.0       | -3460.157174                                                    | 0.0       |
|           | m062x/6-311++G(3df,3pd)         |             | Eo'(m062x/6-311++G(3df,3pd))+ZPE(wB97XD/6-311+G(d,p))         |                   | Eo'(m062x/6-311++G(3df,3pd))+Gcorr(wB97XD/6-311+G(d,p))         |           | Eo'(m062x/6-311++G(3df,3pd))+Hcorr(wB97XD/6-311+G(d,p))         |           |
| 1.1-cis   | -3460.440766                    | -0.8        | -3460.091608                                                  | -0.7              | -3460.142500                                                    | -0.4      | -3460.071325                                                    | -0.7      |
| 1.1-trans | -3460.439562                    | 0.0         | -3460.090483                                                  | 0.0               | -3460.141825                                                    | 0.0       | -3460.070133                                                    | 0.0       |
|           | m062x-D3/6-311++G(3df,3pd)      |             | Eo'(m062x-D3/6-311++G(3df,3pd))+ZPE(wB97XD/6-311+G(d,p))      |                   | Eo'(m062x-D3/6-311++G(3df,3pd))+Gcorr(wB97XD/6-311+G(d,p))      |           | Eo'(m062x-D3/6-311++G(3df,3pd))+Hcorr(wB97XD/6-311+G(d,p))      |           |
| 1.1-cis   | -3460.443338                    | -0.6        | -3460.094180                                                  | -0.6              | -3460.145072                                                    | -0.3      | -3460.073897                                                    | -0.6      |
| 1.1-trans | -3460.442379                    | 0.0         | -3460.093300                                                  | 0.0               | -3460.144642                                                    | 0.0       | -3460.072950                                                    | 0.0       |
|           | m06L/6-311++G(3df,3pd)          |             | Eo'(m06L/6-311++G(3df,3pd))+ZPE(wB97XD/6-311+G(d,p))          |                   | Eo'(m06L/6-311++G(3df,3pd))+Gcorr(wB97XD/6-311+G(d,p))          |           | Eo'(m06L/6-311++G(3df,3pd))+Hcorr(wB97XD/6-311+G(d,p))          |           |
| 1.1-cis   | -3460.538354                    | -0.7        | -3460.189196                                                  | -0.7              | -3460.240088                                                    | -0.4      | -3460.168913                                                    | -0.7      |
| 1.1-trans | -3460.537184                    | 0.0         | -3460.188105                                                  | 0.0               | -3460.239447                                                    | 0.0       | -3460.167755                                                    | 0.0       |
|           | m06L-D3/6-311++G(3df,3pd)       |             | Eo'(m06L-D3/6-311++G(3df,3pd))+ZPE(wB97XD/6-311+G(d,p))       |                   | Eo'(m06L-D3/6-311++G(3df,3pd))+Gcorr(wB97XD/6-311+G(d,p))       |           | Eo'(m06L-D3/6-311++G(3df,3pd))+Hcorr(wB97XD/6-311+G(d,p))       |           |
| 1.1-cis   | -3460.541269                    | -0.6        | -3460.192111                                                  | -0.5              | -3460.243003                                                    | -0.2      | -3460.171828                                                    | -0.6      |
| 1.1-trans | -3460.540374                    | 0.0         | -3460.191295                                                  | 0.0               | -3460.242637                                                    | 0.0       | -3460.170945                                                    | 0.0       |
|           | m052x/6-311++G(3df,3pd)         |             | Eo'(m052x/6-311++G(3df,3pd))+ZPE(wB97XD/6-311+G(d,p))         |                   | Eo'(m052x/6-311++G(3df,3pd))+Gcorr(wB97XD/6-311+G(d,p))         |           | Eo'(m052x/6-311++G(3df,3pd))+Hcorr(wB97XD/6-311+G(d,p))         |           |
| 1.1-cis   | -3460.637512                    | -0.8        | -3460.288354                                                  | -0.7              | -3460.339246                                                    | -0.5      | -3460.268071                                                    | -0.8      |
| 1.1-trans | -3460.636247                    | 0.0         | -3460.287168                                                  | 0.0               | -3460.338510                                                    | 0.0       | -3460.266818                                                    | 0.0       |
|           | m052x-D3/6-311++G(3df,3pd)      |             | Eo'(m052x-D3/6-311++G(3df,3pd))+ZPE(wB97XD/6-311+G(d,p))      |                   | Eo'(m052x-D3/6-311++G(3df,3pd))+Gcorr(wB97XD/6-311+G(d,p))      |           | Eo'(m052x-D3/6-311++G(3df,3pd))+Hcorr(wB97XD/6-311+G(d,p))      |           |
| 1.1-cis   | -3460.642658                    | -0.5        | -3460.293500                                                  | -0.5              | -3460.344392                                                    | -0.2      | -3460.273217                                                    | -0.5      |
| 1.1-trans | -3460.641839                    | 0.0         | -3460.292760                                                  | 0.0               | -3460.344102                                                    | 0.0       | -3460.272410                                                    | 0.0       |
|           | b3lyp-D3BJ/6-311++G(3df,3pd)    |             | Eo'(b3lyp-D3BJ/6-311++G(3df,3pd))+ZPE(wB97XD/6-311+G(d,p))    |                   | Eo'(b3lyp-D3BJ/6-311++G(3df,3pd))+Gcorr(wB97XD/6-311+G(d,p))    |           | Eo'(b3lyp-D3BJ/6-311++G(3df,3pd))+Hcorr(wB97XD/6-311+G(d,p))    |           |
| 1.1-cis   | -3460.892853                    | -0.7        | -3460.543695                                                  | -0.7              | -3460.594587                                                    | -0.4      | -3460.523412                                                    | -0.7      |
| 1.1-trans | -3460.891676                    | 0.0         | -3460.542597                                                  | 0.0               | -3460.593939                                                    | 0.0       | -3460.522247                                                    | 0.0       |
|           | B97D/6-311++G(3df,3pd)          |             | Eo'(B97D/6-311++G(3df,3pd))+ZPE(wB97XD/6-311+G(d,p))          |                   | Eo'(B97D/6-311++G(3df,3pd))+Gcorr(wB97XD/6-311+G(d,p))          |           | Eo'(B97D/6-311++G(3df,3pd))+Hcorr(wB97XD/6-311+G(d,p))          |           |
| 1.1-cis   | -3461.533861                    | -0.5        | -3461.184703                                                  | -0.5              | -3461.235595                                                    | -0.2      | -3461.164420                                                    | -0.5      |
| 1.1-trans | -3461.533007                    | 0.0         | -3461.183928                                                  | 0.0               | -3461.235270                                                    | 0.0       | -3461.163578                                                    | 0.0       |
|           | B97D-D3/6-311++G(3df,3pd)       |             | Eo'(B97D-D3/6-311++G(3df,3pd))+ZPE(wB97XD/6-311+G(d,p))       |                   | Eo'(B97D-D3/6-311++G(3df,3pd))+Gcorr(wB97XD/6-311+G(d,p))       |           | Eo'(B97D-D3/6-311++G(3df,3pd))+Hcorr(wB97XD/6-311+G(d,p))       |           |
| 1.1-cis   | -3461.463946                    | -0.8        | -3461.114788                                                  | -0.7              | -3461.165680                                                    | -0.4      | -3461.094505                                                    | -0.8      |
| 1.1-trans | -3461.462720                    | 0.0         | -3461.113641                                                  | 0.0               | -3461.164983                                                    | 0.0       | -3461.093291                                                    | 0.0       |
|           | TPSSTPSS-D3BJ/6-311++G(3df,3pd) |             | Eo'(TPSSTPSS-D3BJ/6-311++G(3df,3pd))+ZPE(wB97XD/6-311+G(d,p)) |                   | Eo'(TPSSTPSS-D3BJ/6-311++G(3df,3pd))+Gcorr(wB97XD/6-311+G(d,p)) |           | Eo'(TPSSTPSS-D3BJ/6-311++G(3df,3pd))+Hcorr(wB97XD/6-311+G(d,p)) |           |
| 1.1-cis   | -3460.887087                    | -0.5        | -3460.537929                                                  | -0.4              | -3460.588821                                                    | -0.1      | -3460.517646                                                    | -0.5      |
| 1.1-trans | -3460.886334                    | 0.0         | -3460.537255                                                  | 0.0               | -3460.588597                                                    | 0.0       | -3460.516905                                                    | 0.0       |
|           | TPSSTPSS-D3/6-311++G(3df,3pd)   |             | Eo'(TPSSTPSS-D3/6-311++G(3df,3pd))+ZPE(wB97XD/6-311+G(d,p))   |                   | Eo'(TPSSTPSS-D3/6-311++G(3df,3pd))+Gcorr(wB97XD/6-311+G(d,p))   |           | Eo'(TPSSTPSS-D3/6-311++G(3df,3pd))+Hcorr(wB97XD/6-311+G(d,p))   |           |
| 1.1-cis   | -3460.854911                    | -0.6        | -3460.505753                                                  | -0.6              | -3460.556645                                                    | -0.3      | -3460.485470                                                    | -0.6      |
| 1.1-trans | -3460.853952                    | 0.0         | -3460.504873                                                  | 0.0               | -3460.556215                                                    | 0.0       | -3460.484523                                                    | 0.0       |
|           | PBE1PBE-D3BJ/6-311++G(3df,3pd)  |             | Eo'(PBE1PBE-D3BJ/6-311++G(3df,3pd))+ZPE(wB97XD/6-311+G(d,p))  |                   | Eo'(PBE1PBE-D3BJ/6-311++G(3df,3pd))+Gcorr(wB97XD/6-311+G(d,p))  |           | Eo'(PBE1PBE-D3BJ/6-311++G(3df,3pd))+Hcorr(wB97XD/6-311+G(d,p))  |           |
| 1.1-cis   | -3459.467653                    | -0.8        | -3459.118495                                                  | -0.7              | -3459.169387                                                    | -0.4      | -3459.098212                                                    | -0.8      |
| 1.1-trans | -3459.466429                    | 0.0         | -3459.117350                                                  | 0.0               | -3459.168692                                                    | 0.0       | -3459.097000                                                    | 0.0       |
|           | PBE1PBE-D3/6-311++G(3df,3pd)    |             | Eo'(PBE1PBE-D3/6-311++G(3df,3pd))+ZPE(wB97XD/6-311+G(d,p))    |                   | Eo'(PBE1PBE-D3/6-311++G(3df,3pd))+Gcorr(wB97XD/6-311+G(d,p))    |           | Eo'(PBE1PBE-D3/6-311++G(3df,3pd))+Hcorr(wB97XD/6-311+G(d,p))    |           |
| 1.1-cis   | -3459.446895                    | -0.8        | -3459.097737                                                  | -0.8              | -3459.148629                                                    | -0.5      | -3459.077454                                                    | -0.8      |
| 1.1-trans | -3459.445555                    | 0.0         | -3459.096476                                                  | 0.0               | -3459.147818                                                    | 0.0       | -3459.076126                                                    | 0.0       |

ZPE(1.1-cis)= 0.349158; ZPE(1.1-trans)= 0.349079  
 Gcorr(1.1-cis)= 0.298266; Gcorr(1.1-trans)= 0.297737  
 Hcorr(1.1-cis)= 0.369441; Hcorr(1.1-trans)= 0.369429

### Definition of pyramidalization of $\beta$ -carbon

In addition to the bond-forming distance, we quantified the earliness-lateness of the TSs by the degree of pyramidalization of  $\beta$ -carbon in the Michael-acceptor fragment. The pyramidalization was measured by using the dihedral angle of 1( $\gamma$ -C)-2( $\alpha$ -C)-3(H)-4( $\beta$ -C). This angle describes how much the  $\beta$ -carbon comes out of the plane determined by 1( $\gamma$ -C), 2( $\alpha$ -C) and 3(H) atoms. The value of this angle adequately indicates whether  $\beta$ -carbon is reactant-like or closer to the state of the product. For graphical definition of pyramidalization of  $\beta$ -carbon see below (Figure 1).

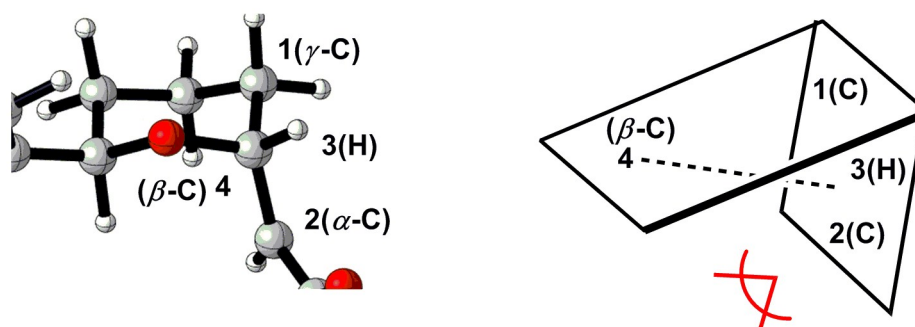

**Figure 1** Measurement of pyramidalization angle: dihedral angle of 1( $\gamma$ -C)-2( $\alpha$ -C)-3(H)-4( $\beta$ -C)

**Table 3** Pyramidalization angles.

| <i>Entity</i>            | <i>Angle (°)</i> |
|--------------------------|------------------|
| <b>10a-alkoxide</b>      | 0.0              |
| TS <b>2.1-trans</b>      | 7.3              |
| TS <b>2.1-cis</b>        | 9.2              |
| enolate <b>2.2-trans</b> | 34.5             |
| enolate <b>2.2-cis</b>   | 35.7             |
| <b>10b-protonated</b>    | 0.1              |
| TS <b>1.1-trans</b>      | 16.1             |
| TS <b>1.1-cis</b>        | 16.4             |
| Enol <b>1.2-trans</b>    | 29.8             |
| Enol <b>1.2-cis</b>      | 30.0             |
